# Supplementary material for: A new reference genome for Sorghum bicolor reveals high levels of sequence similarity between sweet and grain genotypes: implications for the genetics of sugar metabolism
Source: PubMed Central journal article supplement (PMC6537160; doi:10.1186/s12864-019-5734-x), 2019-05-27

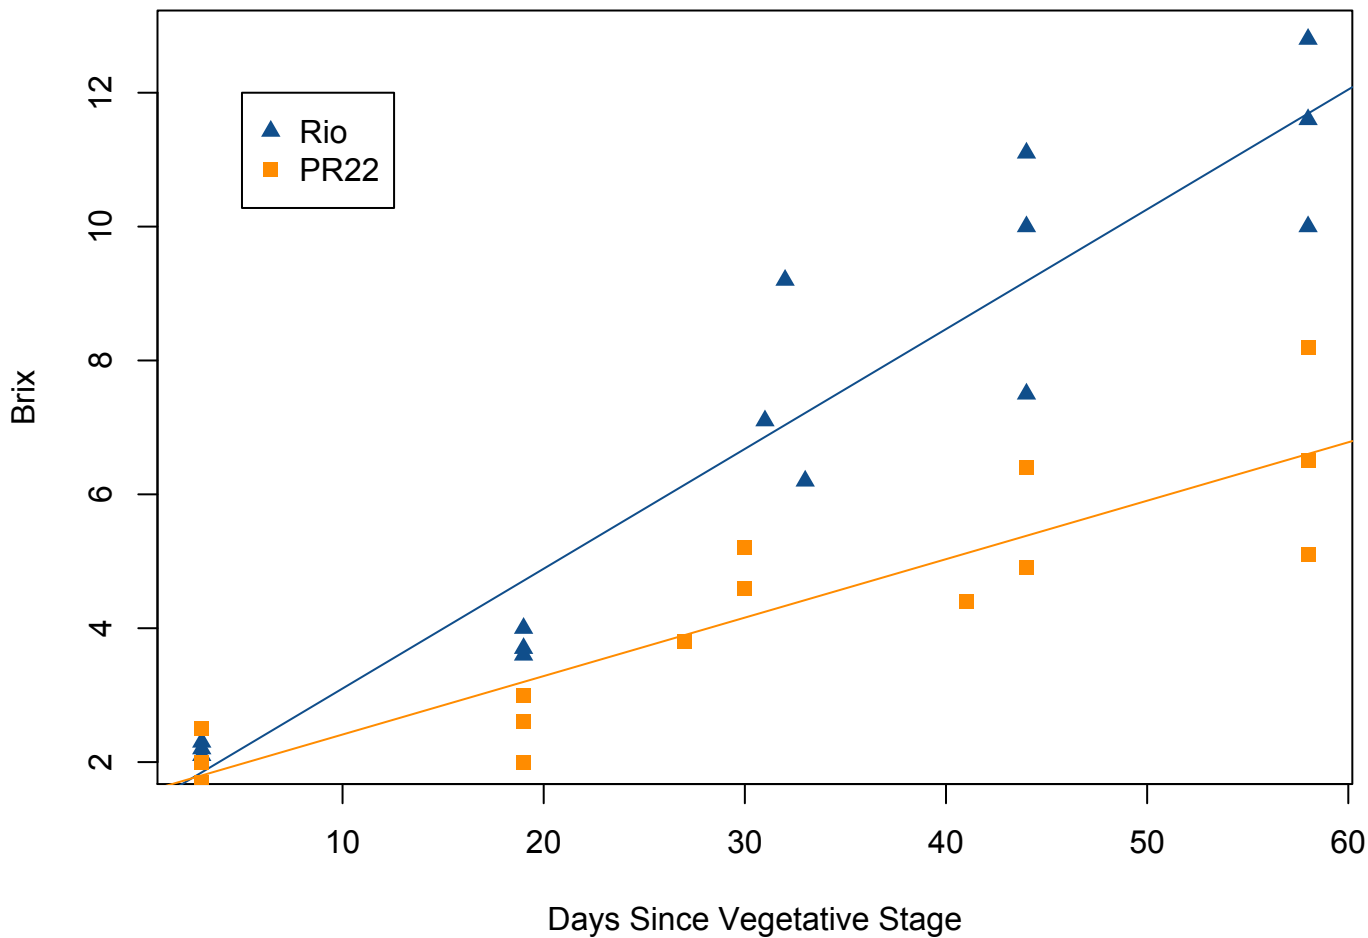

Supplement: 12864_2019_5734_MOESM2_ESM.pdf [file 12864_2019_5734_MOESM2_ESM.pdf]
