# Supplementary material for: A new reference genome for Sorghum bicolor reveals high levels of sequence similarity between sweet and grain genotypes: implications for the genetics of sugar metabolism
Source: BMC Genomics. 2019 May 27;20:420. doi: 10.1186/s12864-019-5734-x (PMC6537160; doi:10.1186/s12864-019-5734-x)
Supplement: Supplementary file 3 — Table S1. Known sucrose-related genes in sorghum and their associated gene IDs. (XLSX 10 kb) [file 12864_2019_5734_MOESM3_ESM.xlsx]

## Sheet: Sheet1
Name	Old BTx623 ID	New BTx623 ID	Rio ID	Alt. Name
SUT1	Sb01g045720	Sobic.001G488700	SoRiov21006927m
SUT2	Sb04g038030	Sobic.004G353600	SoRiov21029254m
SUT3	Sb01g022430	Sobic.001G254000	SoRiov21003498m
SUT4	Sb08g023310	Sobic.008G193300	NA
SUT5	Sb04g023860	Sobic.004G190500	SoRiov21027011m
SUT6	Sb07g028120	Sobic.007G214500	SoRiov21040047m
SWEET1-1	Sb01g035490	Sobic.001G373600	SoRiov21005319m	SbSWEET12_III
SWEET1-2	Sb01g035840	Sobic.001G377600	SoRiov21005370m	SbSWEET16
SWEET2-1	Sb02g029430	Sobic.002G259300	SoRiov21015596m
SWEET3-1	Sb03g001520	Sobic.003G015200	SoRiov21018132m	SbSWEET3B
SWEET3-2	Sb03g003470	Sobic.003G038700	SoRiov21018456m
SWEET3-3	Sb03g003480	Sobic.003G038800	NA
SWEET3-4	Sb03g012930	Sobic.003G149000	SoRiov21019975m
SWEET3-5	Sb03g024250	Sobic.003G182800	SoRiov21020587m	SbSWEET2A
SWEET3-6	Sb03g027260	Sobic.003G213000	SoRiov21021036m	SbSWEET6
SWEET3-7	Sb03g032190	Sobic.003G269300	SoRiov21021821m	SbSWEET2B
SWEET3-8	Sb03g041740	Sobic.003G377700	SoRiov21023309m	SbSWEET1A
SWEET4-1	Sb04g012910	Sobic.004G133500	SoRiov21026143m	SbSWEET4A
SWEET4-2	Sb04g012920	Sobic.004G133600	SoRiov21026145m	SbSWEET4B
SWEET4-3	Sb04g015420	Sobic.004G136600	SoRiov21026216m	SbSWEET4C
SWEET4-4	Sb04g021000	Sobic.004G157100	SoRiov21026549m	SbSWEET15
SWEET5-1	Sb05g018110	Sobic.005G123500	SoRiov21031290m
SWEET7-1	Sb07g026040	Sobic.007G191200	SoRiov21039727m	SbSWEET11A_III
SWEET8-1	Sb08g013620	Sobic.008G094000	SoRiov21041734m	SbSWEET13A
SWEET8-2	Sb08g013840	Sobic.008G094300	NA	SbSWEET13B
SWEET8-3	Sb08g014040	Sobic.008G094400	SoRiov21041737m	SbSWEET13C
SWEET9-1	Sb09g006950	Sobic.009G080900	SoRiov21044345m	SbSWEET3A
SWEET9-2	Sb09g020860	Sobic.009G143500	SoRiov21045303m
SWEET9-3	Sb09g030270	Sobic.009G252000	SoRiov21046772m
SbTST1	Sb01G030430	Sobic.001G312900	SoRiov21004491m
SbTST2	Sb04G008150	Sobic.004G099300	SoRiov21025633m
SbTST3	Sb10g031000	Sobic.010G276100	SoRiov21008119m
INV1	Sb01g008910	Sobic.001G099700	SoRiov21001334m
INV2	Sb03g047060	Sobic.003G440900	SoRiov21024139m
INV3	Sb04g000620	Sobic.004G004800	SoRiov21024273m
INV4	Sb06g031930	Sobic.006G255600	SoRiov21036517m
SPS1	Sb03g043900	Sobic.003G403300	SoRiov21023651m
SPS2	Sb04g005720	Sobic.004G068400	SoRiov21025178m
SPS3	Sb05g007310	Sobic.005G089600	SoRiov21030573m
SPS4	Sb09g028570	Sobic.009G233200	SoRiov21046511m
SPS5	Sb10g025240	Sobic.010G205100	SoRiov21010753m
SUS1	Sb01g035890	Sobic.001G378300	SoRiov21005378m
SUS2	Sb04g038410	Sobic.004G357600	SoRiov21029310m
SUS3	Sb10g031040	Sobic.010G276700	SoRiov21003995m
SbSUSy1	Sb01g033060	Sobic.001G344500	SoRiov21004917m
