# Supplementary material for: A new reference genome for Sorghum bicolor reveals high levels of sequence similarity between sweet and grain genotypes: implications for the genetics of sugar metabolism
Source: BMC Genomics. 2019 May 27;20:420. doi: 10.1186/s12864-019-5734-x (PMC6537160; doi:10.1186/s12864-019-5734-x)
Supplement: Supplementary file 4 — Table S2. Samples collected for RNA sequencing. (XLSX 10 kb) [file 12864_2019_5734_MOESM4_ESM.xlsx]

## Sheet: Sheet1
Sample #	Genotype	Tissue	Replicate	Time Point
1	Rio	Meristem	1	Veg
2	Rio	Meristem	2	Veg
3	Rio	Meristem	3	Veg
4	Rio	Meristem	1	RepInit
5	Rio	Meristem	2	RepInit
6	Rio	Meristem	3	RepInit
7	Rio	Meristem	1	FlagLeaf
8	Rio	Meristem	2	FlagLeaf
9	Rio	Meristem	3	FlagLeaf
10	Rio	Floral	1	Anthesis
11	Rio	Floral	2	Anthesis
12	Rio	Floral	3	Anthesis
13	Rio	Seed	1	SoftDough
14	Rio	Seed	2	SoftDough
15	Rio	Seed	3	SoftDough
16	Rio	Internode	1	Veg
17	Rio	Internode	2	Veg
18	Rio	Internode	3	Veg
19	Rio	Internode	1	RepInit
20	Rio	Internode	2	RepInit
21	Rio	Internode	3	RepInit
22	Rio	Internode	1	FlagLeaf
23	Rio	Internode	2	FlagLeaf
24	Rio	Internode	3	FlagLeaf
25	Rio	Internode	1	Anthesis
26	Rio	Internode	2	Anthesis
27	Rio	Internode	3	Anthesis
28	Rio	Internode	1	SoftDough
29	Rio	Internode	2	SoftDough
30	Rio	Internode	3	SoftDough
31	Rio	Leaf	1	Veg
32	Rio	Leaf	2	Veg
33	Rio	Leaf	3	Veg
34	Rio	Leaf	1	RepInit
35	Rio	Leaf	2	RepInit
36	Rio	Leaf	3	RepInit
37	Rio	Leaf	1	FlagLeaf
38	Rio	Leaf	2	FlagLeaf
39	Rio	Leaf	3	FlagLeaf
40	Rio	Leaf	1	Anthesis
41	Rio	Leaf	2	Anthesis
42	Rio	Leaf	3	Anthesis
43	Rio	Leaf	1	SoftDough
44	Rio	Leaf	2	SoftDough
45	Rio	Leaf	3	SoftDough
46	PR22	Meristem	1	Veg
47	PR22	Meristem	2	Veg
48	PR22	Meristem	3	Veg
49	PR22	Meristem	1	RepInit
50	PR22	Meristem	2	RepInit
51	PR22	Meristem	3	RepInit
52	PR22	Meristem	1	FlagLeaf
53	PR22	Meristem	2	FlagLeaf
54	PR22	Meristem	3	FlagLeaf
55	PR22	Floral	1	Anthesis
56	PR22	Floral	2	Anthesis
57	PR22	Floral	3	Anthesis
58	PR22	Seed	1	SoftDough
59	PR22	Seed	2	SoftDough
60	PR22	Seed	3	SoftDough
61	PR22	Internode	1	Veg
62	PR22	Internode	2	Veg
63	PR22	Internode	3	Veg
64	PR22	Internode	1	RepInit
65	PR22	Internode	2	RepInit
66	PR22	Internode	3	RepInit
67	PR22	Internode	1	FlagLeaf
68	PR22	Internode	2	FlagLeaf
69	PR22	Internode	3	FlagLeaf
70	PR22	Internode	1	Anthesis
71	PR22	Internode	2	Anthesis
72	PR22	Internode	3	Anthesis
73	PR22	Internode	1	SoftDough
74	PR22	Internode	2	SoftDough
75	PR22	Internode	3	SoftDough
76	PR22	Leaf	1	Veg
77	PR22	Leaf	2	Veg
78	PR22	Leaf	3	Veg
79	PR22	Leaf	1	RepInit
80	PR22	Leaf	2	RepInit
81	PR22	Leaf	3	RepInit
82	PR22	Leaf	1	FlagLeaf
83	PR22	Leaf	2	FlagLeaf
84	PR22	Leaf	3	FlagLeaf
85	PR22	Leaf	1	Anthesis
86	PR22	Leaf	2	Anthesis
87	PR22	Leaf	3	Anthesis
88	PR22	Leaf	1	SoftDough
89	PR22	Leaf	2	SoftDough
90	PR22	Leaf	3	SoftDough
