# Supplementary material for: A new reference genome for Sorghum bicolor reveals high levels of sequence similarity between sweet and grain genotypes: implications for the genetics of sugar metabolism
Source: BMC Genomics. 2019 May 27;20:420. doi: 10.1186/s12864-019-5734-x (PMC6537160; doi:10.1186/s12864-019-5734-x)
Supplement: Supplementary file 5 — Table S3. SRA accession numbers and sample information. (XLSX 10 kb) [file 12864_2019_5734_MOESM5_ESM.xlsx]

## Sheet: Sheet1
Sequencing Project Name	Sample ID	Sample Name	Library Name	NCBI SRA Accession ID
Sorghum bicolor BTx3197 Standard Draft	111488	BTX3197_gDNA	AYUNP	SRP089290
Sorghum bicolor BTx3197XRio Standard Draft	111490	PR22_RIL_gDNA	AYUNS	SRP089289
Sorghum bicolor BTx3197XRio Transcriptome	130322	PR22-V-M2	BOUPS	SRP123936
Sorghum bicolor BTx3197XRio Transcriptome	130324	PR22-V-M3	BOUPT	SRP123969
Sorghum bicolor BTx3197XRio Transcriptome	130326	PR22-V-L1	BOUPU	SRP123940
Sorghum bicolor BTx3197XRio Transcriptome	130328	PR22-V-L2	BOUPW	SRP123935
Sorghum bicolor BTx3197XRio Transcriptome	130330	PR22-V-L3	BOUPX	SRP123939
Sorghum bicolor BTx3197XRio Transcriptome	130332	PR22-V-I1	BOUPY	SRP123932
Sorghum bicolor BTx3197XRio Transcriptome	130336	PR22-V-I3	BOUPZ	SRP123931
Sorghum bicolor BTx3197XRio Transcriptome	130338	PR22-RI-M1	BOUST	SRP123927
Sorghum bicolor BTx3197XRio Transcriptome	130340	PR22-RI-M2	BOUSU	SRP123949
Sorghum bicolor BTx3197XRio Transcriptome	130342	PR22-RI-M3	BOUSW	SRP123930
Sorghum bicolor BTx3197XRio Transcriptome	130344	PR22-RI-L1	BOUSX	SRP123962
Sorghum bicolor BTx3197XRio Transcriptome	130346	PR22-RI-L2	BOUSY	SRP123928
Sorghum bicolor BTx3197XRio Transcriptome	130348	PR22-RI-L3	BOUSZ	SRP123925
Sorghum bicolor BTx3197XRio Transcriptome	130350	PR22-RI-I1	BOUTA	SRP123947
Sorghum bicolor BTx3197XRio Transcriptome	130352	PR22-RI-I2	BOUTB	SRP123942
Sorghum bicolor BTx3197XRio Transcriptome	130354	PR22-RI-I3	BOUTC	SRP123924
Sorghum bicolor BTx3197XRio Transcriptome	130356	PR22-FL-M1	BOUTX	SRP123926
Sorghum bicolor BTx3197XRio Transcriptome	130358	PR22-FL-M2	BOUTY	SRP123967
Sorghum bicolor BTx3197XRio Transcriptome	130360	PR22-FL-M3	BOUTZ	SRP123957
Sorghum bicolor BTx3197XRio Transcriptome	130362	PR22-FL-L1	BOUUA	SRP123941
Sorghum bicolor BTx3197XRio Transcriptome	130364	PR22-FL-L2	BOUUB	SRP123929
Sorghum bicolor BTx3197XRio Transcriptome	130368	PR22-FL-I1	BOUUG	SRP123952
Sorghum bicolor BTx3197XRio Transcriptome	130370	PR22-FL-I2	BOUUH	SRP123959
Sorghum bicolor BTx3197XRio Transcriptome	130372	PR22-FL-I3	BOUUN	SRP123950
Sorghum bicolor BTx3197XRio Transcriptome	130374	PR22-ANT-F1	BOUWA	SRP123970
Sorghum bicolor BTx3197XRio Transcriptome	130376	PR22-ANT-F2	BOUWB	SRP123954
Sorghum bicolor BTx3197XRio Transcriptome	130378	PR22-ANT-F3	BOUWC	SRP123971
Sorghum bicolor BTx3197XRio Transcriptome	130380	PR22-ANT-L1	BOUWG	SRP123964
Sorghum bicolor BTx3197XRio Transcriptome	130382	PR22-ANT-L2	BOUWH	SRP123946
Sorghum bicolor BTx3197XRio Transcriptome	130384	PR22-ANT-L3	BOUWN	SRP123948
Sorghum bicolor BTx3197XRio Transcriptome	130386	PR22-ANT-I1	BOUWO	SRP123951
Sorghum bicolor BTx3197XRio Transcriptome	130388	PR22-ANT-I2	BOUWP	SRP123973
Sorghum bicolor BTx3197XRio Transcriptome	130390	PR22-ANT-I3	BOUWS	SRP123937
Sorghum bicolor BTx3197XRio Transcriptome	130320	PR22-V-M1	BOUXG	SRP123961
Sorghum bicolor BTx3197XRio Transcriptome	130334	PR22-V-I2	BOUXH	SRP123960
Sorghum bicolor BTx3197XRio Transcriptome	130392	PR22-SD-S1	BPAAS	SRP123958
Sorghum bicolor BTx3197XRio Transcriptome	130396	PR22-SD-S3	BPAAX	SRP123955
Sorghum bicolor BTx3197XRio Transcriptome	130398	PR22-SD-L1	BPAAZ	SRP123966
Sorghum bicolor BTx3197XRio Transcriptome	130400	PR22-SD-L2	BPABB	SRP123972
Sorghum bicolor BTx3197XRio Transcriptome	130404	PR22-SD-I1	BPABN	SRP123933
Sorghum bicolor BTx3197XRio Transcriptome	130406	PR22-SD-I2	BPABP	SRP123938
Sorghum bicolor BTx3197XRio Transcriptome	130408	PR22-SD-I3	BPABT	SRP123934
Sorghum bicolor BTx3197XRio Transcriptome	130410	PR22-BL-S1	BPABW	SRP123956
Sorghum bicolor BTx3197XRio Transcriptome	130412	PR22-BL-S2	BPABY	SRP123953
Sorghum bicolor BTx3197XRio Transcriptome	130414	PR22-BL-S3	BPACA	SRP123944
Sorghum bicolor BTx3197XRio Transcriptome	130416	PR22-BL-L1	BPACC	SRP123943
Sorghum bicolor BTx3197XRio Transcriptome	130418	PR22-BL-L2	BPACH	SRP123945
Sorghum bicolor BTx3197XRio Transcriptome	130422	PR22-BL-I1	BPACS	SRP123965
Sorghum bicolor BTx3197XRio Transcriptome	130424	PR22-BL-I2	BPACU	SRP123963
Sorghum bicolor BTx3197XRio Transcriptome	130426	PR22-BL-I3	BPACX	SRP123968
