# Supplementary material for: A new reference genome for Sorghum bicolor reveals high levels of sequence similarity between sweet and grain genotypes: implications for the genetics of sugar metabolism
Source: BMC Genomics. 2019 May 27;20:420. doi: 10.1186/s12864-019-5734-x (PMC6537160; doi:10.1186/s12864-019-5734-x)
Supplement: Supplementary file 6 — Table S4. Gene IDs and descriptions for the top 50 DEGs with moderate to high impact mutations in each tissue. Only genes with the alternate allele in the RIL are considered. Genes correspond to those shown in Fig. 5. (XLSX 14 kb) [file 12864_2019_5734_MOESM6_ESM.xlsx]

## Sheet: Sheet1
GeneID	ArabidopsisName	Description	Tissue
Sobic.009G250800		Pectin lyase-like superfamily protein	Int
Sobic.009G242200	MPK9	MAP kinase 9	Int
Sobic.004G036200	NAMT1	S-adenosyl-L-methionine-dependent methyltransferases superfamily protein	Int
Sobic.002G075800	AtSIP2,SIP2	seed imbibition 2	Int
Sobic.006G249400	ATGSL1,GLN2,GS2	glutamine synthetase 2	Int
Sobic.004G148600		ankyrin repeat family protein	Int
Sobic.009G003300			Int
Sobic.006G232800			Int
Sobic.009G072200		myb-like transcription factor family protein	Int
Sobic.001G525900	BEL1	POX (plant homeobox) family protein	Int
Sobic.002G104400		NB-ARC domain-containing disease resistance protein	Int
Sobic.005G082100	PME61	pectin methylesterase 61	Int
Sobic.009G235700		Major facilitator superfamily protein	Int
Sobic.006G142500	ALE2	Protein kinase superfamily protein	Int
Sobic.005G062700	ATCNFU2,NFU2	NIFU-like protein 2	Int
Sobic.007G211200		Leucine-rich repeat protein kinase family protein	Int
Sobic.006G271300		Calcium-dependent lipid-binding (CaLB domain) family protein	Int
Sobic.008G059900	EMB3003	2-oxoacid dehydrogenases acyltransferase family protein	Int
Sobic.003G084200			Int
Sobic.001G264201			Int
Sobic.004G296300	CAT9	cationic amino acid transporter 9	Int
Sobic.001G481400	HRE1	Integrase-type DNA-binding superfamily protein	Int
Sobic.002G067000		P-loop containing nucleoside triphosphate hydrolases superfamily protein	Int
Sobic.004G128600	ATPCAP1,PCAP1	plasma-membrane associated cation-binding protein 1	Int
Sobic.004G299300		Protein kinase superfamily protein	Int
Sobic.006G176600	ATBCAT-5	branched-chain amino acid aminotransferase 5 / branched-chain amino acid transaminase 5 (BCAT5)	Int
Sobic.001G013400			Int
Sobic.006G177000	CYP86A4	cytochrome P450, family 86, subfamily A, polypeptide 4	Int
Sobic.005G064600	anac032,NAC032	NAC domain containing protein 32	Int
Sobic.003G109832	CYP72A15	cytochrome P450, family 72, subfamily A, polypeptide 15	Int
Sobic.006G123000		Transducin/WD40 repeat-like superfamily protein	Int
Sobic.006G076000			Int
Sobic.006G238500		Coatomer epsilon subunit	Int
Sobic.002G204400		P-loop containing nucleoside triphosphate hydrolases superfamily protein	Int
Sobic.004G347500		P-loop containing nucleoside triphosphate hydrolases superfamily protein	Int
Sobic.002G079300		O-methyltransferase family protein	Int
Sobic.002G124900	ATPQ	ATP synthase D chain, mitochondrial	Int
Sobic.003G061300		Thiamine pyrophosphate dependent pyruvate decarboxylase family protein	Int
Sobic.005G182200	RPM1,RPS3	NB-ARC domain-containing disease resistance protein	Int
Sobic.003G393100	ATCAP-E1,ATSMC4,SMC2,TTN3	structural maintenance of chromosomes 2	Int
Sobic.002G203000	CIPK5,SnRK3.24	CBL-interacting protein kinase 5	Int
Sobic.002G326800	CRK20	cysteine-rich RLK (RECEPTOR-like protein kinase) 20	Int
Sobic.004G351100	ATSPPL2,SPPL2	SIGNAL PEPTIDE PEPTIDASE-LIKE 2	Int
Sobic.002G302000	XTH32	xyloglucan endotransglucosylase/hydrolase 32	Int
Sobic.002G327500	CRK10,RLK4	cysteine-rich RLK (RECEPTOR-like protein kinase) 10	Int
Sobic.003G397300			Int,Mer
Sobic.008G062200		Thiamin diphosphate-binding fold (THDP-binding) superfamily protein	Int
Sobic.003G139900	SPL12	squamosa promoter-binding protein-like 12	Int
Sobic.002G259900			Int
Sobic.005G169400	HEL,PR-4,PR4	pathogenesis-related 4	Lf
Sobic.002G204300	ENP,MAB4,NPY1	Phototropic-responsive NPH3 family protein	Lf
Sobic.005G169200	HEL,PR-4,PR4	pathogenesis-related 4	Lf
Sobic.001G004800		Domain of unknown function (DUF303)	Lf
Sobic.002G329100	CRK10,RLK4	cysteine-rich RLK (RECEPTOR-like protein kinase) 10	Lf
Sobic.006G259600	ATMTK,MTK	S-methyl-5-thioribose kinase	Lf
Sobic.005G033100	ATLACS7,LACS7	long-chain acyl-CoA synthetase 7	Lf
Sobic.001G036300		peptidase M1 family protein	Lf
Sobic.005G084300			Lf
Sobic.003G178700	CER60,KCS5	3-ketoacyl-CoA synthase 5	Lf
Sobic.004G143900		Aldolase-type TIM barrel family protein	Lf
Sobic.006G190200			Lf
Sobic.002G320600	CN,SPR2,TOR1	ARM repeat superfamily protein	Lf
Sobic.006G050500		Phosphoenolpyruvate carboxylase family protein	Lf
Sobic.007G194400	ATEXO70F1,EXO70F1	exocyst subunit exo70 family protein F1	Lf
Sobic.001G534532		Protein kinase superfamily protein	Lf
Sobic.009G073100	ATZIP4,ZIP4	zinc transporter 4 precursor	Lf
Sobic.004G109100		RING/U-box superfamily protein	Lf
Sobic.001G008800			Lf
Sobic.009G072100		Zinc finger C-x8-C-x5-C-x3-H type family protein	Lf
Sobic.004G167300		F-box family protein	Lf
Sobic.005G052000		Protein kinase superfamily protein	Lf
Sobic.003G195600		basic helix-loop-helix (bHLH) DNA-binding family protein	Lf
Sobic.009G009800		Serine protease inhibitor, potato inhibitor I-type family protein	Lf
Sobic.006G121200	ATNRT3.1,NRT3.1,WR3	nitrate transmembrane transporters	Lf
Sobic.003G079700		Protein kinase superfamily protein	Lf
Sobic.003G413201		Leucine-rich repeat receptor-like protein kinase family protein	Lf
Sobic.004G323800		Peptide chain release factor 2	Lf
Sobic.002G220300	HAT14	homeobox from Arabidopsis thaliana	Lf
Sobic.002G317800		BNR/Asp-box repeat family protein	Lf
Sobic.009G159900	BLH9,BLR,HB-6,LSN,PNY,RPL,VAN	POX (plant homeobox) family protein	Lf
Sobic.002G201600		S-adenosyl-L-methionine-dependent methyltransferases superfamily protein	Lf
Sobic.009G022700			Lf,Mer
Sobic.006G266200	PYRD	pyrimidine d	Lf
Sobic.009G074300	CYP90D1	cytochrome P450, family 90, subfamily D, polypeptide 1	Lf
Sobic.001G030600		UDP-Glycosyltransferase superfamily protein	Lf
Sobic.006G164300	ATYSL3,YSL3	YELLOW STRIPE like 3	Lf
Sobic.009G057700	ATZIP6,ZIP6	ZIP metal ion transporter family	Lf
Sobic.002G227300			Lf
Sobic.002G327201		Receptor-like protein kinase-related family protein	Lf
Sobic.006G177800		Prolyl oligopeptidase family protein	Lf
Sobic.008G052900		CBS / octicosapeptide/Phox/Bemp1 (PB1) domains-containing protein	Lf
Sobic.003G031100		basic helix-loop-helix (bHLH) DNA-binding family protein	Lf
Sobic.003G229700	ATGPAT1,GPAT1	glycerol-3-phosphate acyltransferase 1	Lf
Sobic.003G213000	AtVEX1	Nodulin MtN3 family protein	Lf
Sobic.004G037200	CAS1	cycloartenol synthase 1	Lf
Sobic.003G124200		Phenazine biosynthesis PhzC/PhzF protein	Lf
Sobic.003G104350		NmrA-like negative transcriptional regulator family protein	Lf
Sobic.009G045000		tetratricopeptide repeat (TPR)-containing protein	Lf
Sobic.009G258100		ERD (early-responsive to dehydration stress) family protein	Lf
Sobic.005G094001		LRR and NB-ARC domains-containing disease resistance protein	Mer
Sobic.002G128101		protein kinase family protein	Mer
Sobic.003G437400		Peroxidase superfamily protein	Mer
Sobic.002G409900	ATOBGC,CPSAR1,EMB269	GTP1/OBG family protein	Mer
Sobic.005G093800	RPM1,RPS3	NB-ARC domain-containing disease resistance protein	Mer
Sobic.003G064200		Homeodomain-like superfamily protein	Mer
Sobic.003G021900	CYP710A1	cytochrome P450, family 710, subfamily A, polypeptide 1	Mer
Sobic.005G137400			Mer
Sobic.003G203500	ALDH1A,ALDH2C4,REF1	aldehyde dehydrogenase 2C4	Mer
Sobic.007G194800	MPL1	Myzus persicae-induced lipase 1	Mer
Sobic.006G098200			Mer
Sobic.002G329500	AT-BETA-AMY,ATBETA-AMY,BAM5,BMY1,RAM1	beta-amylase 5	Mer
Sobic.003G040600		DNAse I-like superfamily protein	Mer
Sobic.004G310100	ATFLS1,FLS,FLS1	flavonol synthase 1	Mer
Sobic.003G445900		Leucine-rich repeat protein kinase family protein	Mer
Sobic.001G028100	emb1138	DEAD box RNA helicase (RH3)	Mer
Sobic.005G183900	ABCG40,ATABCG40,ATPDR12,PDR12	pleiotropic drug resistance 12	Mer
Sobic.005G057700		Leucine-rich repeat protein kinase family protein	Mer
Sobic.001G012400	AtUGT85A3,UGT85A3	UDP-glucosyl transferase 85A3	Mer
Sobic.001G012000	CYP71B34	cytochrome P450, family 71, subfamily B, polypeptide 34	Mer
Sobic.001G518700	LCR69,PDF2.2	low-molecular-weight cysteine-rich 69	Mer
Sobic.004G087500	ATNTT1,NTT1	nucleotide transporter 1	Mer
Sobic.008G065932			Mer
Sobic.001G100600			Mer
Sobic.001G172200			Mer
Sobic.001G012300	CYP79B2	cytochrome P450, family 79, subfamily B, polypeptide 2	Mer
Sobic.004G024400	PEP	RNA-binding KH domain-containing protein	Mer
Sobic.003G424400		ARM repeat superfamily protein	Mer
Sobic.005G033801		UDP-Glycosyltransferase superfamily protein	Mer
Sobic.006G128200	AGC2,AGC2-1,AtOXI1,OXI1	AGC (cAMP-dependent, cGMP-dependent and protein kinase C) kinase family protein	Mer
Sobic.005G103200			Mer
Sobic.005G038500		Pentatricopeptide repeat (PPR) superfamily protein	Mer
Sobic.004G159100	GUT1	Exostosin family protein	Mer
Sobic.004G297600	PLA-I{beta]2	alpha/beta-Hydrolases superfamily protein	Mer
Sobic.002G397600		Protein phosphatase 2C family protein	Mer
Sobic.009G016600	ATMYB48,ATMYB48-1,ATMYB48-2,ATMYB48-3,MYB48	myb domain protein 48	Mer
Sobic.002G407300		NAD(P)-binding Rossmann-fold superfamily protein	Mer
Sobic.005G087400	ARAF,ARAF1,ASD1,ATASD1	alpha-L-arabinofuranosidase 1	Mer
Sobic.005G165500		Subtilase family protein	Mer
Sobic.004G112100		Rhomboid-related intramembrane serine protease family protein	Mer
Sobic.003G400200		Protein of unknown function (DUF506)	Mer
Sobic.002G407500		NAD(P)-binding Rossmann-fold superfamily protein	Mer
Sobic.001G538100		Transducin/WD40 repeat-like superfamily protein	Mer
Sobic.002G220600	ATKT1,ATKT1P,ATKUP1,KT1,KUP1	potassium transporter 1	Mer
Sobic.005G036000		Pollen Ole e 1 allergen and extensin family protein	Mer
Sobic.001G511000	ATPTR3,PTR3	peptide transporter 3	Mer
Sobic.003G109900		rRNA processing protein-related	Mer
Sobic.009G009000	ATTPS21,TPS21	terpene synthase 21	Mer
