# Supplementary material for: A new reference genome for Sorghum bicolor reveals high levels of sequence similarity between sweet and grain genotypes: implications for the genetics of sugar metabolism
Source: BMC Genomics. 2019 May 27;20:420. doi: 10.1186/s12864-019-5734-x (PMC6537160; doi:10.1186/s12864-019-5734-x)
Supplement: Supplementary file 7 — Table S5. Predicted SNP effects for the top 50 Internode DEGs. Genes correspond to those shown in Fig. 5. Columns 4–31 are taken directly from the output of the program snpEff. Details can be found in the snpEff reference manual. Column 32 (GT.pvalue) is the significance of the Genotype x Time interaction term in the differential expression analysis. Columns 33–37 are the Fold Changes at each developmental stage, calculated as Rio/PR22 (Sweet/Non-Sweet). (XLSX 19 kb) [file 12864_2019_5734_MOESM7_ESM.xlsx]

## Sheet: Internode_DEGs_Ballele_snpEff
Supplemental Table 5: Predicted SNP effects for the top 50 Internode DEGs. Genes correspond to those shown in Figure 5.
Columns 4-31 are taken directly from the output of the program snpEff. Details can be found in the snpEff reference manual.
Column 32 (GT.pvalue) is the significance of the Genotype x Time interaction term in the differential expression analysis.
Columns 33-37 are the Fold Changes at each developmental stage, calculated as Rio/PR22 (Sweet/Non-Sweet)
BTxID	RioID	GeneName	variants_impact_HIGH	variants_impact_LOW	variants_impact_MODERATE	variants_impact_MODIFIER	variants_effect_3_prime_UTR_variant	variants_effect_5_prime_UTR_premature_start_codon_gain_variant	variants_effect_5_prime_UTR_truncation	variants_effect_5_prime_UTR_variant	variants_effect_conservative_inframe_deletion	variants_effect_conservative_inframe_insertion	variants_effect_disruptive_inframe_deletion	variants_effect_disruptive_inframe_insertion	variants_effect_downstream_gene_variant	variants_effect_exon_loss_variant	variants_effect_frameshift_variant	variants_effect_initiator_codon_variant	variants_effect_intron_variant	variants_effect_missense_variant	variants_effect_non_coding_transcript_variant	variants_effect_splice_acceptor_variant	variants_effect_splice_donor_variant	variants_effect_splice_region_variant	variants_effect_start_lost	variants_effect_stop_gained	variants_effect_stop_lost	variants_effect_stop_retained_variant	variants_effect_synonymous_variant	variants_effect_upstream_gene_variant	GT.pvalue	VegFC	RepIntFC	FlagLFC	AnthFC	SoftDFC
Sobic.009G250800.1	SoRiov21046753m.g	Sobic.009G250800	0	3	2	40	3	0	0	0	0	0	0	0	17	0	0	0	1	2	0	0	0	0	0	0	0	0	3	19	3.65051e-14	2.94118	10.3571	0.044733	3.22727	7.16667
Sobic.009G242200.1	SoRiov21046640m.g	Sobic.009G242200	0	0	1	21	0	0	0	0	1	0	0	0	5	0	0	0	2	0	0	0	0	0	0	0	0	0	0	14	6.9392e-12	0.623853	8	0.0118203	2.19231	1.50847
Sobic.004G036200.1	SoRiov21024739m.g	Sobic.004G036200	2	0	1	107	3	0	0	0	0	0	0	0	44	0	2	0	15	1	0	0	0	1	0	0	0	0	0	45	7.34156e-12	0.00226799	0.0160252	Inf	0.000346786	11.0093
Sobic.002G075800.1	SoRiov21012893m.g	Sobic.002G075800	4	6	5	234	18	2	0	12	2	0	1	0	152	0	4	0	7	2	0	0	0	0	0	0	0	0	4	45	9.91151e-12	0.177562	0.427236	22.6431	2.15767	7.69575
Sobic.006G249400.1	SoRiov21036433m.g	Sobic.006G249400	0	5	3	171	11	0	0	5	0	1	0	0	86	0	0	0	57	2	0	0	0	3	0	0	0	0	2	15	1.11676e-11	0.734035	1.09072	0.164444	1.24764	4.8587
Sobic.004G148600.1	SoRiov21026423m.g	Sobic.004G148600	0	0	1	73	0	0	0	0	0	0	0	0	18	0	0	0	33	1	0	0	0	0	0	0	0	0	0	22	7.05668e-11	0	0.80427	3.66885	1.33533	2.39029
Sobic.009G003300.1	SoRiov21043233m.g	Sobic.009G003300	0	1	4	59	4	0	0	1	0	0	0	0	25	0	0	0	1	4	0	0	0	1	0	0	0	0	1	28	1.68627e-10	5.8017	1.33463	2.9121	0.774697	5.04617
Sobic.006G232800.1	SoRiov21036198m.g	Sobic.006G232800	0	0	2	39	0	0	0	1	0	0	0	0	20	0	0	0	2	2	0	0	0	1	0	0	0	0	0	16	5.21532e-10	0.967012	1.43491	0.281966	1.6581	1.5309
Sobic.009G072200.1	SoRiov21044224m.g	Sobic.009G072200	0	0	2	166	0	0	0	0	0	1	0	0	141	0	0	0	0	1	0	0	0	1	0	0	0	0	0	25	1.06258e-09	0.297203	0.502183	74.4444	0.171654	1.57516
Sobic.001G525900.3	SoRiov21007439m.g	Sobic.001G525900	0	2	4	44	0	0	0	0	0	2	0	0	16	0	0	0	12	2	0	0	0	1	0	0	0	0	1	17	1.53054e-09	0.936126	1.13386	19.3636	1.11111	5.88795
Sobic.002G104400.1	SoRiov21013305m.g	Sobic.002G104400	4	3	20	161	3	0	0	0	0	1	2	1	51	0	4	0	68	16	0	0	0	0	0	0	0	0	3	39	1.70521e-09	0.758065	0.0376307	0.150571	0.100971	0.509716
Sobic.005G082100.1	SoRiov21030448m.g	Sobic.005G082100	0	5	3	74	3	0	0	2	0	0	0	0	18	0	0	0	5	3	0	0	0	0	0	0	0	0	5	46	1.70521e-09	6.7	Inf	0.190476	Inf	0
Sobic.009G235700.1	SoRiov21046548m.g	Sobic.009G235700	0	11	5	262	2	0	0	1	0	0	0	0	171	0	0	0	73	5	0	0	0	4	0	0	0	0	8	18	2.36756e-09	0.896359	2.66507	0.154115	2.92453	0.883495
Sobic.006G142500.2	SoRiov21034965m.g	Sobic.006G142500	0	0	2	19	0	0	0	0	0	0	0	0	5	0	0	0	0	2	0	0	0	0	0	0	0	0	0	14	1.47025e-08	0.446602	10.6207	0.0738916	5.85455	1.25
Sobic.005G062700.1	SoRiov21030193m.g	Sobic.005G062700	0	0	3	163	1	0	0	0	0	1	0	0	27	0	0	0	1	2	0	0	0	0	0	0	0	0	0	134	1.60903e-08	1.40097	0.78635	2.39908	0.784889	1.38396
Sobic.007G211200.1	SoRiov21040001m.g	Sobic.007G211200	0	7	3	49	0	0	0	3	0	0	0	0	29	0	0	0	0	3	0	0	0	0	0	0	0	0	7	17	1.88752e-08	0.806452	2.75	0	Inf	0.666667
Sobic.006G271300.1	SoRiov21036738m.g	Sobic.006G271300	0	1	1	70	3	0	0	0	0	0	0	0	16	0	0	0	2	1	0	0	0	0	0	0	0	0	1	49	2.43754e-08	0.584946	1.68794	0.234817	1.93832	3.20089
Sobic.008G059900.2	SoRiov21041047m.g	Sobic.008G059900	0	7	1	148	8	0	0	0	0	1	0	0	34	0	0	0	58	0	0	0	0	0	0	0	0	0	7	48	2.70177e-08	1.71761	4.01619	0.176578	2.16011	1.46862
Sobic.003G084200.1	SoRiov21019055m.g	Sobic.003G084200	0	21	36	355	3	0	0	30	1	1	1	0	83	0	0	0	82	33	0	0	0	0	0	0	0	0	21	157	4.11976e-08	1.72727	3.67273	0.166324	3.30769	0.736655
Sobic.001G264201.1	SoRiov21024314m.g	Sobic.001G264201	1	0	1	95	0	0	0	0	0	0	0	0	53	0	1	0	17	1	0	0	0	0	0	0	0	0	0	25	5.61928e-08	0.632411	0.908451	2.94333	0.551686	2.46401
Sobic.004G296300.1	SoRiov21028457m.g	Sobic.004G296300	0	1	1	44	2	0	0	0	0	0	0	0	21	0	0	0	2	1	0	0	0	0	0	0	0	0	1	19	5.61928e-08	2.75	Inf	0.117647	7.36364	5
Sobic.001G481400.2	SoRiov21006824m.g	Sobic.001G481400	0	5	6	52	4	0	0	1	0	2	0	1	10	0	0	0	1	3	0	0	0	1	0	0	0	0	4	37	7.19036e-08	1.23132	0.477411	92	1.11628	5.18421
Sobic.002G067000.1	SoRiov21012766m.g	Sobic.002G067000	0	1	2	67	0	1	0	4	1	1	0	0	46	0	0	0	0	0	0	0	0	0	0	0	0	0	0	17	7.60075e-08	0.285714	0.324324	257	0.0383764	0.430955
Sobic.004G128600.1	SoRiov21026029m.g	Sobic.004G128600	0	0	1	51	1	0	0	0	0	0	0	0	15	0	0	0	0	1	0	0	0	1	0	0	0	0	0	35	8.42501e-08	1.21031	12.8048	0.0244023	3.32353	3.375
Sobic.004G299300.1	SoRiov21028498m.g	Sobic.004G299300	0	2	1	164	6	0	0	7	0	0	0	0	46	0	0	0	11	1	0	0	0	0	0	0	0	0	2	94	8.95793e-08	0.868545	1.36131	7.87	0.668471	1.09199
Sobic.006G176600.1	SoRiov21035423m.g	Sobic.006G176600	2	3	9	138	0	2	0	19	0	1	1	0	67	0	2	0	4	7	0	0	0	0	0	0	0	0	1	48	1.14885e-07	0.589489	1.01236	1.84886	0.84739	1.22328
Sobic.001G013400.1	SoRiov21000173m.g	Sobic.001G013400	0	0	2	70	1	0	0	0	0	0	0	0	12	0	0	0	2	2	0	0	0	0	0	0	0	0	0	55	1.38089e-07	1.39474	10.5385	0.00557491	4.83333	0.666667
Sobic.001G264201.1	SoRiov21045554m.g	Sobic.001G264201	1	0	1	95	0	0	0	0	0	0	0	0	53	0	1	0	17	1	0	0	0	0	0	0	0	0	0	25	1.39602e-07	0.662028	0.851816	4.25407	0.612557	2.12958
Sobic.006G177000.1	SoRiov21035427m.g	Sobic.006G177000	0	1	2	39	0	1	0	1	0	0	0	0	28	0	0	0	0	2	0	0	0	0	0	0	0	0	0	10	2.50962e-07	2.98697	Inf	0.0705882	Inf	1
Sobic.005G064600.2	SoRiov21030221m.g	Sobic.005G064600	0	1	1	64	0	0	0	0	0	0	0	0	7	0	0	0	13	1	0	0	0	0	0	0	0	0	1	44	2.82204e-07	1	1.24457	29.7727	0.602404	1.32936
Sobic.003G109832.1	SoRiov21019418m.g	Sobic.003G109832	3	18	3	346	0	0	0	0	2	1	0	0	43	0	3	0	71	0	0	0	0	2	1	0	0	0	16	234	3.42237e-07	0.560976	0.764706	10.6364	0.902857	6.14706
Sobic.006G123000.1	SoRiov21034673m.g	Sobic.006G123000	2	2	2	129	13	0	0	1	0	1	0	0	69	0	2	0	0	1	0	0	0	0	0	0	0	0	2	46	4.07475e-07	0.748428	0.915663	4.95312	1.19624	3.53279
Sobic.006G076000.1	SoRiov21034031m.g	Sobic.006G076000	0	0	1	0	0	0	0	0	0	0	0	1	0	0	0	0	0	0	0	0	0	0	0	0	0	0	0	0	4.41337e-07	0.538462	11.4688	0.00257359	38.75	0.727273
Sobic.006G238500.1	SoRiov21036280m.g	Sobic.006G238500	0	8	1	76	1	7	0	58	0	0	0	0	4	0	0	0	1	1	0	0	0	1	0	0	0	0	1	12	5.25197e-07	0.893617	Inf	0.772727	Inf	Inf
Sobic.002G204400.1	SoRiov21014860m.g	Sobic.002G204400	0	2	3	194	1	0	0	0	0	0	0	0	135	0	0	0	17	3	0	0	0	2	0	0	0	0	1	42	5.59567e-07	0.23913	11.8	0.0390879	8.84615	0.809524
Sobic.004G347500.2	SoRiov21029156m.g	Sobic.004G347500	0	1	4	49	1	0	0	0	1	0	0	0	13	0	0	0	5	3	0	0	0	0	0	0	0	0	1	30	6.12486e-07	0.911765	10.3168	0.0594609	2.55	1.2127
Sobic.002G079300.1	SoRiov21012949m.g	Sobic.002G079300	0	6	1	217	26	0	0	0	0	0	0	0	87	0	0	0	16	1	0	0	0	1	0	0	0	0	5	88	6.47594e-07	Inf	NA	Inf	2	Inf
Sobic.002G124900.1	SoRiov21013597m.g	Sobic.002G124900	0	4	1	56	1	0	0	1	0	0	0	0	13	0	0	0	31	1	0	0	0	1	0	0	0	0	3	11	6.55107e-07	1.42494	1.99722	0.340899	1.84485	2.02689
Sobic.003G061300.1	SoRiov21018756m.g	Sobic.003G061300	0	2	2	39	2	0	0	3	0	0	0	0	16	0	0	0	14	2	0	0	0	0	0	0	0	0	2	4	7.43917e-07	0.943678	0.481752	14.7345	0.284463	1.02564
Sobic.005G182200.2	SoRiov21032128m.g	Sobic.005G182200	1	0	0	49	0	0	0	0	0	0	0	0	34	0	1	0	0	0	0	0	0	0	0	0	0	0	0	15	8.49484e-07	0.795238	1.1374	1.75	1.06731	17.4667
Sobic.003G393100.1	SoRiov21023522m.g	Sobic.003G393100	0	2	2	38	1	0	0	1	0	0	0	0	19	0	0	0	11	2	0	0	0	0	0	0	0	0	2	6	9.35167e-07	1.07143	1.54545	0.0518767	4.84733	4.09783
Sobic.002G203000.1	SoRiov21014841m.g	Sobic.002G203000	0	3	1	175	2	0	0	0	1	0	0	0	14	0	0	0	0	0	0	0	0	0	0	0	0	0	3	159	9.65301e-07	0.5	1.05839	13.6136	2.82243	1.58311
Sobic.002G326800.1	SoRiov21016496m.g	Sobic.002G326800	0	1	2	173	6	0	0	0	0	0	0	0	42	0	0	0	9	2	0	0	0	0	0	0	0	0	1	116	1.08033e-06	0.878788	1.43333	65	0.671233	0.592
Sobic.004G351100.1	SoRiov21029223m.g	Sobic.004G351100	0	6	1	130	13	0	0	3	0	0	0	0	43	0	0	0	56	1	0	0	0	1	0	0	0	0	5	16	1.14766e-06	0.584527	0.978947	1.44705	0.999337	1.45066
Sobic.002G302000.1	SoRiov21016178m.g	Sobic.002G302000	0	1	1	50	12	0	0	1	0	0	0	0	25	0	0	0	3	1	0	0	0	1	0	0	0	0	0	10	1.24025e-06	0.872699	11.6269	0.0828793	9.53571	1.68182
Sobic.002G327500.1	SoRiov21016505m.g	Sobic.002G327500	2	15	26	311	7	1	0	17	0	2	0	0	28	0	2	0	47	24	0	0	0	0	0	0	0	0	14	212	1.24025e-06	0.0351124	0.218072	0.439024	0.530021	3.08759
Sobic.003G397300.1	SoRiov21023574m.g	Sobic.003G397300	0	3	3	179	2	0	0	0	0	1	0	0	159	0	0	0	0	2	0	0	0	0	0	0	0	0	3	18	1.26994e-06	0.572557	0.368249	4.89205	0.046875	0.183333
Sobic.008G062200.1	SoRiov21041080m.g	Sobic.008G062200	0	2	2	39	0	0	0	2	0	0	0	1	12	0	0	0	9	1	0	0	0	0	0	0	0	0	2	16	1.29317e-06	0.927171	0.25	7.16579	0.585972	1.23069
Sobic.003G139900.2	SoRiov21019846m.g	Sobic.003G139900	0	1	1	52	0	0	0	0	0	0	0	0	10	0	0	0	0	1	0	0	0	0	0	0	0	0	1	42	1.53482e-06	0.845352	0.726888	1.56385	0.637858	1.22832
Sobic.002G259900.1	SoRiov21015603m.g	Sobic.002G259900	0	3	3	33	0	1	0	1	0	0	0	0	9	0	0	0	3	3	0	0	0	0	0	0	0	0	2	20	1.58835e-06	0.854545	5.14679	0.143264	2.70833	1.4507
