# Supplementary material for: A new reference genome for Sorghum bicolor reveals high levels of sequence similarity between sweet and grain genotypes: implications for the genetics of sugar metabolism
Source: BMC Genomics. 2019 May 27;20:420. doi: 10.1186/s12864-019-5734-x (PMC6537160; doi:10.1186/s12864-019-5734-x)
Supplement: Supplementary file 8 — Table S6. Predicted SNP effects for the top 50 Leaf DEGs. Genes correspond to those shown in Fig. 5. Details about columns are the same as described for Additional file 7: Table S5. (XLSX 19 kb) [file 12864_2019_5734_MOESM8_ESM.xlsx]

## Sheet: Leaf_DEGs_Ballele_snpEff
Supplemental Table 6: Predicted SNP effects for the top 50 Leaf DEGs. Genes correspond to those shown in Figure 5.
Columns 4-31 are taken directly from the output of the program snpEff. Details can be found in the snpEff reference manual.
Column 32 (GT.pvalue) is the significance of the Genotype x Time interaction term in the differential expression analysis.
Columns 33-37 are the Fold Changes at each developmental stage, calculated as Rio/PR22 (Sweet/Non-Sweet)
BTxID	RioID	GeneName	variants_impact_HIGH	variants_impact_LOW	variants_impact_MODERATE	variants_impact_MODIFIER	variants_effect_3_prime_UTR_variant	variants_effect_5_prime_UTR_premature_start_codon_gain_variant	variants_effect_5_prime_UTR_truncation	variants_effect_5_prime_UTR_variant	variants_effect_conservative_inframe_deletion	variants_effect_conservative_inframe_insertion	variants_effect_disruptive_inframe_deletion	variants_effect_disruptive_inframe_insertion	variants_effect_downstream_gene_variant	variants_effect_exon_loss_variant	variants_effect_frameshift_variant	variants_effect_initiator_codon_variant	variants_effect_intron_variant	variants_effect_missense_variant	variants_effect_non_coding_transcript_variant	variants_effect_splice_acceptor_variant	variants_effect_splice_donor_variant	variants_effect_splice_region_variant	variants_effect_start_lost	variants_effect_stop_gained	variants_effect_stop_lost	variants_effect_stop_retained_variant	variants_effect_synonymous_variant	variants_effect_upstream_gene_variant	GT.pvalue	VegFC	RepIntFC	FlagLFC	AnthFC	SoftDFC
Sobic.005G169400.1	SoRiov21031948m.g	Sobic.005G169400	0	2	3	126	4	0	0	1	0	0	0	1	84	0	0	0	1	2	0	0	0	0	0	0	0	0	2	36	1.10998e-13	0.0665671	0.524444	0.00258437	292	0.581771
Sobic.002G204300.1	SoRiov21014859m.g	Sobic.002G204300	0	1	1	116	0	0	0	6	0	0	0	0	49	0	0	0	22	1	0	0	0	0	0	0	0	0	1	39	7.74696e-12	1.44795	1.86667	1.54412	0.0551034	1.47723
Sobic.005G169200.1	SoRiov21031945m.g	Sobic.005G169200	0	0	1	71	2	0	0	1	0	0	0	0	27	0	0	0	15	1	1	0	0	0	0	0	0	0	0	25	1.35204e-11	0.258907	1.70806	0.00218866	61.7222	0.881639
Sobic.001G004800.1	SoRiov21000060m.g	Sobic.001G004800	0	0	5	41	0	0	0	1	1	1	0	0	13	0	0	0	0	3	0	0	0	0	0	0	0	0	0	27	3.38323e-11	Inf	0	0.333333	0	0.0526316
Sobic.002G329100.1	SoRiov21016537m.g	Sobic.002G329100	0	6	11	117	1	0	0	0	0	1	0	0	96	0	0	0	10	10	0	0	0	0	0	0	0	0	6	10	1.6873e-10	0.301221	0.914407	0.113253	4.90395	2.79497
Sobic.006G259600.1	SoRiov21036579m.g	Sobic.006G259600	0	5	3	110	0	1	0	6	0	0	0	0	12	0	0	0	44	3	0	0	0	1	0	0	0	0	3	49	2.50162e-10	0.633663	0.569211	0.367008	4.61538	0.662837
Sobic.005G033100.1	SoRiov21029777m.g	Sobic.005G033100	0	6	5	291	3	0	0	1	1	0	0	0	187	0	0	0	80	4	0	0	0	2	0	0	0	0	5	21	3.37364e-10	3.27778	1.70929	2.96429	0.036089	0.849389
Sobic.001G036300.1	SoRiov21000493m.g	Sobic.001G036300	0	6	1	128	4	2	0	16	0	0	0	0	29	0	0	0	32	1	0	0	0	0	0	0	0	0	4	47	4.39329e-10	0.498311	0.583498	0.525178	4.97822	0.658972
Sobic.005G084300.1	SoRiov21030500m.g	Sobic.005G084300	0	5	4	225	52	4	0	27	0	0	0	0	96	0	0	0	16	4	0	0	0	0	0	0	0	0	1	34	4.39329e-10	0.131469	1.12996	0.0329887	49.56	0.917453
Sobic.003G178700.1	SoRiov21020539m.g	Sobic.003G178700	0	1	2	62	4	0	0	2	0	0	0	0	19	0	0	0	0	2	0	0	0	0	0	0	0	0	1	37	2.61994e-09	0.58441	0.901173	0.588933	23.3265	3.08308
Sobic.004G143900.1	SoRiov21026347m.g	Sobic.004G143900	0	0	1	39	6	0	0	0	0	0	0	0	1	0	0	0	7	1	0	0	0	0	0	0	0	0	0	25	3.59603e-09	1.01403	1.0504	2.29489	0.165921	0.550306
Sobic.006G190200.1	SoRiov21035603m.g	Sobic.006G190200	1	1	1	52	1	1	0	5	0	0	0	0	19	0	1	0	3	1	0	0	0	0	0	0	0	0	0	24	3.59603e-09	0.993464	0.790036	1.57194	0.313936	0.676101
Sobic.002G320600.1	SoRiov21016419m.g	Sobic.002G320600	0	3	1	82	0	0	0	0	0	0	0	0	43	0	0	0	7	1	0	0	0	0	0	0	0	0	3	32	3.6606e-09	1.44444	1.23098	0.854115	0.164809	1.37193
Sobic.006G050500.2	SoRiov21033661m.g	Sobic.006G050500	0	0	1	6	6	0	0	0	0	0	0	0	0	0	0	0	0	1	0	0	0	0	0	0	0	0	0	0	2.01597e-08	0.468115	0.821534	0.229467	2.61748	0.805082
Sobic.007G194400.1	SoRiov21039769m.g	Sobic.007G194400	0	2	3	148	1	0	0	0	0	0	0	0	20	0	0	0	0	3	0	0	0	0	0	0	0	0	2	127	8.15964e-08	0.215983	0.34594	0.321168	29.7778	0.799876
Sobic.001G534532.1	SoRiov21007571m.g	Sobic.001G534532	2	0	3	28	5	0	0	1	0	0	0	2	3	0	2	0	0	1	0	0	0	0	0	0	0	0	0	19	8.67462e-08	32.5758	62.5	3.07874	0.00385852	Inf
Sobic.009G073100.1	SoRiov21044234m.g	Sobic.009G073100	0	0	1	2	0	0	0	0	0	0	0	0	1	0	0	0	0	1	0	0	0	0	0	0	0	0	0	1	1.02093e-07	0.404231	0.491082	0.25553	4.33814	0.437402
Sobic.004G109100.3	SoRiov21025763m.g	Sobic.004G109100	1	2	4	52	0	0	0	0	1	1	0	0	14	0	0	0	2	2	0	1	0	1	0	0	0	0	1	38	1.7974e-07	0.227723	1.20161	0.227811	38.7143	1.17553
Sobic.001G008800.1	SoRiov21000108m.g	Sobic.001G008800	1	0	0	33	0	0	0	0	0	0	0	0	19	0	1	0	0	0	0	0	0	0	0	0	0	0	0	14	1.80275e-07	0.46328	0.586549	0.469585	3.48901	0.554598
Sobic.009G072100.1	SoRiov21044218m.g	Sobic.009G072100	0	2	3	54	21	0	0	0	1	1	0	0	16	0	0	0	6	1	0	0	0	1	0	0	0	0	1	11	1.89625e-07	0.337423	0.765924	18.6468	0.401038	0.77762
Sobic.004G167300.1	SoRiov21026699m.g	Sobic.004G167300	0	3	2	100	7	0	0	1	0	0	0	0	3	0	0	0	0	2	0	0	0	0	0	0	0	0	3	89	2.56914e-07	0.343373	0.77044	0.0528355	70.5455	1.1965
Sobic.005G052000.1	SoRiov21030053m.g	Sobic.005G052000	4	2	6	114	1	0	0	0	0	1	0	0	16	0	4	0	1	5	0	0	0	0	0	0	0	0	2	96	3.67115e-07	0.246729	0.479404	0.117952	13.4043	0.803672
Sobic.003G195600.1	SoRiov21020787m.g	Sobic.003G195600	2	1	4	95	1	0	0	8	0	0	0	0	19	0	2	0	33	4	0	0	0	0	0	0	0	0	1	34	4.70377e-07	0.111332	0.196671	0	11.9714	0.584848
Sobic.009G009800.1	SoRiov21043315m.g	Sobic.009G009800	0	1	1	95	0	0	0	0	0	0	0	0	86	0	0	0	0	1	0	0	0	0	0	0	0	0	1	9	5.31215e-07	8.83333	2.30743	54.5	0.00112296	2.9375
Sobic.006G121200.2	SoRiov21034651m.g	Sobic.006G121200	0	1	2	224	29	0	0	0	0	0	0	0	126	0	0	0	61	2	0	0	0	0	0	0	0	0	1	8	7.76934e-07	0.211111	0.893939	0.100885	13.1224	1.89217
Sobic.003G079700.1	SoRiov21018995m.g	Sobic.003G079700	0	1	6	37	0	0	0	0	0	0	0	0	6	0	0	0	2	6	0	0	0	0	0	0	0	0	1	29	1.29927e-06	0	4.25926	0.0656716	Inf	0.887097
Sobic.003G413201.1	SoRiov21023793m.g	Sobic.003G413201	0	1	2	42	0	0	0	0	0	0	0	0	29	0	0	0	1	2	0	0	0	0	0	0	0	0	1	12	1.29927e-06	0.106918	0.327189	0.145585	49	0.701389
Sobic.004G323800.1	SoRiov21028835m.g	Sobic.004G323800	0	0	1	40	2	0	0	0	0	0	0	0	12	0	0	0	1	1	0	0	0	0	0	0	0	0	0	25	1.29927e-06	0.43659	0.54	0.287202	10.6783	0.461126
Sobic.002G220300.1	SoRiov21015065m.g	Sobic.002G220300	0	2	5	113	10	0	0	0	1	0	0	0	60	0	0	0	4	4	0	0	0	0	0	0	0	0	2	39	1.87047e-06	0.592664	0.261834	0.140177	5.43644	0.887868
Sobic.002G317800.1	SoRiov21016386m.g	Sobic.002G317800	2	6	7	65	3	0	0	2	0	0	1	0	35	0	2	0	12	6	0	0	0	4	0	0	0	0	3	16	2.00286e-06	0.288917	0.517426	0.146928	5.89942	0.934978
Sobic.009G159900.1	SoRiov21045531m.g	Sobic.009G159900	0	6	4	128	3	0	0	2	0	0	0	0	67	0	0	0	52	4	0	0	0	1	0	0	0	0	5	5	2.06413e-06	0.623762	1.38669	0.90085	0.196152	0.937184
Sobic.002G201600.1	SoRiov21014819m.g	Sobic.002G201600	0	11	3	240	11	0	0	1	0	0	0	0	113	0	0	0	6	3	1	0	0	1	0	0	0	0	10	108	2.14067e-06	1.21218	3.14876	1.94574	0.202122	0.3939
Sobic.009G022700.1	SoRiov21043493m.g	Sobic.009G022700	0	1	1	63	1	1	0	1	0	1	0	0	31	0	0	0	17	0	0	0	0	0	0	0	0	0	0	13	2.30453e-06	0.309342	0.536424	0.0983146	16.84	1.17948
Sobic.006G266200.3	SoRiov21036673m.g	Sobic.006G266200	0	0	1	30	0	0	0	2	0	0	0	0	18	0	0	0	3	1	0	0	0	0	0	0	0	0	0	7	2.3701e-06	0.635099	0.743961	0.320809	2.86901	0.561726
Sobic.009G074300.1	SoRiov21044250m.g	Sobic.009G074300	0	0	1	70	1	0	0	0	0	0	0	0	27	0	0	0	6	1	0	0	0	0	0	0	0	0	0	36	3.73648e-06	0.580198	1.32799	2.53681	0.146335	0.592229
Sobic.001G030600.1	SoRiov21000415m.g	Sobic.001G030600	0	1	1	20	1	0	0	0	0	0	0	0	3	0	0	0	0	1	0	0	0	0	0	0	0	0	1	16	4.21207e-06	0	0.0522876	0	213.667	0.551515
Sobic.006G164300.1	SoRiov21035264m.g	Sobic.006G164300	0	7	1	154	1	2	0	8	0	0	0	0	47	0	0	0	13	1	0	0	0	2	0	0	0	0	3	87	5.19361e-06	0.395121	1.19113	0.421486	4.31827	0.438765
Sobic.009G057700.1	SoRiov21044021m.g	Sobic.009G057700	0	5	2	146	1	0	0	0	0	0	0	0	50	0	0	0	66	2	0	0	0	1	0	0	0	0	4	30	5.62647e-06	0.345561	0.753469	0.360704	4.25506	0.631362
Sobic.002G227300.1	SoRiov21015163m.g	Sobic.002G227300	0	0	1	70	4	0	0	1	0	1	0	0	16	0	0	0	0	0	0	0	0	0	0	0	0	0	0	49	5.67869e-06	0.96888	2.25	1.36207	0.115021	1.69106
Sobic.002G327201.1	SoRiov21016500m.g	Sobic.002G327201	0	1	1	165	0	0	0	0	0	0	0	0	131	0	0	0	2	1	0	0	0	0	0	0	0	0	1	32	5.67869e-06	0.973684	1.74007	0.0235988	330	0.977273
Sobic.006G177800.1	SoRiov21035437m.g	Sobic.006G177800	0	6	1	111	4	0	0	2	0	0	0	0	20	0	0	0	56	1	0	0	0	3	0	0	0	0	3	32	6.70539e-06	0.0151015	0.16927	0.00332705	21.0512	0.209606
Sobic.008G052900.1	SoRiov21040952m.g	Sobic.008G052900	0	0	1	166	1	0	0	0	0	0	0	0	46	0	0	0	61	1	0	0	0	0	0	0	0	0	0	58	6.79911e-06	0.929766	1.00747	0.852756	0.38546	0.597067
Sobic.003G031100.1	SoRiov21018349m.g	Sobic.003G031100	1	1	8	129	35	0	0	1	3	1	0	0	49	0	0	0	34	5	0	0	0	1	0	0	1	0	1	10	6.85721e-06	0	0.531034	0	Inf	0.969843
Sobic.003G229700.1	SoRiov21021267m.g	Sobic.003G229700	0	0	3	103	0	0	0	1	0	0	0	0	3	0	0	0	28	3	0	0	0	0	0	0	0	0	0	71	6.85721e-06	2.46703	4.04028	1.37838	0.0877684	19.8293
Sobic.003G213000.1	SoRiov21021036m.g	Sobic.003G213000	0	1	1	27	0	1	0	1	0	0	0	0	10	0	0	0	3	1	0	0	0	0	0	0	0	0	0	13	7.05026e-06	0.672131	1.12794	2.65297	0.0925081	1.228
Sobic.004G037200.1	SoRiov21024753m.g	Sobic.004G037200	0	1	2	57	1	1	0	3	0	0	0	0	10	0	0	0	3	2	0	0	0	0	0	0	0	0	0	40	7.1672e-06	2.27137	2.25753	1.23057	0.218941	0.952928
Sobic.003G124200.1	SoRiov21019605m.g	Sobic.003G124200	0	0	1	76	2	0	0	1	0	0	0	0	52	0	0	0	2	1	0	0	0	0	0	0	0	0	0	19	8.12063e-06	0.25829	0.836364	0.355738	4.85246	0.407821
Sobic.003G104350.1	SoRiov21019348m.g	Sobic.003G104350	1	1	3	79	0	0	0	0	0	0	0	0	69	0	1	0	1	3	0	0	0	0	0	0	0	0	1	9	9.3016e-06	29.5	5	2.33333	0.104294	0.795455
Sobic.009G045000.1	SoRiov21043845m.g	Sobic.009G045000	0	0	1	76	1	0	0	0	0	0	0	0	16	0	0	0	12	1	0	0	0	0	0	0	0	0	0	47	9.68719e-06	0.553425	0.590304	0.52591	2.48473	0.654878
Sobic.009G258100.1	SoRiov21046874m.g	Sobic.009G258100	0	0	1	61	0	0	0	3	0	0	0	0	13	0	0	0	5	1	0	0	0	0	0	0	0	0	0	40	1.11182e-05	1.10355	0.867383	2.91909	0.124098	0.645046
