# Supplementary material for: A new reference genome for Sorghum bicolor reveals high levels of sequence similarity between sweet and grain genotypes: implications for the genetics of sugar metabolism
Source: BMC Genomics. 2019 May 27;20:420. doi: 10.1186/s12864-019-5734-x (PMC6537160; doi:10.1186/s12864-019-5734-x)
Supplement: Supplementary file 9 — Table S7. Predicted SNP effects for the top 50 Meristem DEGs. Genes correspond to those shown in Fig. 5. Details about columns are the same as described for Additional file 7: Table S5. (XLSX 19 kb) [file 12864_2019_5734_MOESM9_ESM.xlsx]

## Sheet: Meristem_DEGs_Ballele_snpEff
Supplemental Table 7: Predicted SNP effects for the top 50 Meristem DEGs. Genes correspond to those shown in Figure 5.
Columns 4-31 are taken directly from the output of the program snpEff. Details can be found in the snpEff reference manual.
Column 32 (GT.pvalue) is the significance of the Genotype x Time interaction term in the differential expression analysis.
Columns 33-37 are the Fold Changes at each developmental stage, calculated as Rio/PR22 (Sweet/Non-Sweet)
BTxID	RioID	GeneName	variants_impact_HIGH	variants_impact_LOW	variants_impact_MODERATE	variants_impact_MODIFIER	variants_effect_3_prime_UTR_variant	variants_effect_5_prime_UTR_premature_start_codon_gain_variant	variants_effect_5_prime_UTR_truncation	variants_effect_5_prime_UTR_variant	variants_effect_conservative_inframe_deletion	variants_effect_conservative_inframe_insertion	variants_effect_disruptive_inframe_deletion	variants_effect_disruptive_inframe_insertion	variants_effect_downstream_gene_variant	variants_effect_exon_loss_variant	variants_effect_frameshift_variant	variants_effect_initiator_codon_variant	variants_effect_intron_variant	variants_effect_missense_variant	variants_effect_non_coding_transcript_variant	variants_effect_splice_acceptor_variant	variants_effect_splice_donor_variant	variants_effect_splice_region_variant	variants_effect_start_lost	variants_effect_stop_gained	variants_effect_stop_lost	variants_effect_stop_retained_variant	variants_effect_synonymous_variant	variants_effect_upstream_gene_variant	GT.pvalue	VegFC	RepIntFC	FlagLFC	AnthFC	SoftDFC
Sobic.005G094001.2	SoRiov21030640m.g	Sobic.005G094001	0	2	1	20	1	1	0	1	0	0	0	0	5	0	0	0	3	1	0	0	0	1	0	0	0	0	0	11	3.24884e-21	0.842926	0.390977	1.40407	4.09446	7.00829
Sobic.002G128101.1	SoRiov21013642m.g	Sobic.002G128101	0	0	1	131	8	0	0	5	0	0	0	0	20	0	0	0	2	1	0	0	0	0	0	0	0	0	0	96	1.46943e-15	0	0	0	1.87129	0.0718563
Sobic.003G437400.1	SoRiov21024098m.g	Sobic.003G437400	0	3	2	97	1	0	0	0	0	1	1	0	16	0	0	0	1	0	0	0	0	0	0	0	0	0	3	79	6.75218e-15	Inf	0	Inf	1.42105	4.12984
Sobic.002G409900.1	SoRiov21017603m.g	Sobic.002G409900	0	16	17	212	23	0	0	0	0	1	0	1	40	0	0	0	18	15	0	0	0	2	0	0	0	0	14	133	5.83794e-12	0.928161	1.13684	1.75397	2.52152	5.84483
Sobic.005G093800.1	SoRiov21030639m.g	Sobic.005G093800	0	0	2	23	0	0	0	0	0	0	0	1	5	0	0	0	0	1	0	0	0	0	0	0	0	0	0	18	1.52694e-10	3.76923	7.47368	1.8913	0.0633374	0.116667
Sobic.003G064200.2	SoRiov21018794m.g	Sobic.003G064200	1	9	11	157	3	0	0	1	1	0	2	2	21	0	1	0	12	6	0	0	0	2	0	0	0	0	7	122	1.28439e-09	NA	0.752741	0	3.01519	2.58974
Sobic.003G021900.1	SoRiov21004050m.g	Sobic.003G021900	0	2	2	294	0	0	0	0	0	0	0	0	99	0	0	0	0	2	0	0	0	0	0	0	0	0	2	195	7.34756e-09	4.12081	0.249351	1.21267	3.9322	8.08911
Sobic.005G137400.1	SoRiov21031508m.g	Sobic.005G137400	0	3	2	78	6	0	0	0	0	0	0	0	11	0	0	0	16	2	0	0	0	0	0	0	0	0	3	45	7.34756e-09	Inf	Inf	Inf	0.586957	0.870588
Sobic.003G203500.1	SoRiov21020913m.g	Sobic.003G203500	0	6	2	98	0	0	0	16	0	0	0	0	16	0	0	0	68	2	0	0	0	2	0	0	0	0	4	0	5.54389e-08	1.1623	1.42006	0.57649	2.43557	7.98278
Sobic.007G194800.2	SoRiov21039774m.g	Sobic.007G194800	0	5	2	201	1	0	0	23	0	0	1	0	32	0	0	0	37	1	0	0	0	3	0	0	0	0	2	111	1.5863e-06	36	1.33898	2.11594	1.05806	2.27936
Sobic.006G098200.1	SoRiov21034320m.g	Sobic.006G098200	0	0	1	77	4	0	0	1	0	0	0	0	23	0	0	0	5	1	0	0	0	0	0	0	0	0	0	44	7.4388e-06	3.26724	0.452632	2.26794	1.01178	0.980745
Sobic.002G329500.1	SoRiov21016546m.g	Sobic.002G329500	0	8	4	277	12	0	0	0	0	0	0	0	152	0	0	0	15	4	0	0	0	1	0	0	0	0	7	99	1.1959e-05	0.65505	0.485586	1.3293	3.27438	6.74369
Sobic.003G040600.1	SoRiov21018481m.g	Sobic.003G040600	0	0	1	278	0	0	0	10	0	0	0	0	231	0	0	0	20	1	0	0	0	0	0	0	0	0	0	17	1.41311e-05	5.5	0.181818	0.222222	0.615385	3.37805
Sobic.004G310100.1	SoRiov21028651m.g	Sobic.004G310100	0	6	1	37	13	0	0	0	0	0	0	0	12	0	0	0	0	1	0	0	0	0	0	0	0	0	6	12	2.24546e-05	8	0.940695	0.357143	4.66667	1.51471
Sobic.003G445900.1	SoRiov21024206m.g	Sobic.003G445900	0	1	1	61	1	0	0	7	0	1	0	0	14	0	0	0	11	0	0	0	0	0	0	0	0	0	1	28	3.06624e-05	4.62332	1.61029	2.89796	1.1125	1.62083
Sobic.001G028100.1	SoRiov21000380m.g	Sobic.001G028100	0	1	1	47	0	0	0	0	0	0	0	0	37	0	0	0	4	1	0	0	0	0	0	0	0	0	1	6	3.18263e-05	0.942384	0.605061	1.43904	0.822889	1.78502
Sobic.005G183900.1	SoRiov21032155m.g	Sobic.005G183900	0	17	11	127	3	0	0	0	0	0	0	0	36	0	0	0	18	11	0	0	0	4	0	0	0	0	13	73	3.65841e-05	Inf	1.83333	Inf	Inf	139
Sobic.005G057700.1	SoRiov21030112m.g	Sobic.005G057700	0	1	3	80	0	0	0	2	0	0	0	0	10	0	0	0	42	3	0	0	0	1	0	0	0	0	0	27	4.51233e-05	55.875	Inf	124	2.62081	3.94231
Sobic.001G012400.1	SoRiov21000158m.g	Sobic.001G012400	0	3	4	37	0	0	0	0	0	0	0	0	26	0	0	0	0	4	0	0	0	0	0	0	0	0	3	11	4.82636e-05	2.129	1.34468	0.762674	2.94529	6.98063
Sobic.001G012000.1	SoRiov21000151m.g	Sobic.001G012000	0	0	5	87	2	0	0	2	0	1	0	0	50	0	0	0	0	4	0	0	0	0	0	0	0	0	0	33	5.2641e-05	15	5	0	0.778027	6.6
Sobic.001G518700.1	SoRiov21007342m.g	Sobic.001G518700	0	1	2	35	0	1	0	6	0	0	0	0	18	0	0	0	0	2	0	0	0	0	0	0	0	0	0	11	5.2641e-05	3.5942	0.423077	2.55053	28	0.938128
Sobic.004G087500.1	SoRiov21025448m.g	Sobic.004G087500	0	1	2	76	0	0	0	0	1	0	0	0	62	0	0	0	1	1	0	0	0	0	0	0	0	0	1	13	5.2641e-05	1.04245	0.700033	1.39546	0.86864	0.749184
Sobic.008G065932.1	SoRiov21041140m.g	Sobic.008G065932	0	2	1	90	7	0	0	1	0	0	0	0	5	0	0	0	32	1	0	0	0	1	0	0	0	0	1	45	5.2641e-05	0.235598	0.289037	0.27446	0.624837	1.1223
Sobic.001G100600.1	SoRiov21001343m.g	Sobic.001G100600	0	1	1	128	3	1	0	9	0	0	0	0	108	0	0	0	0	1	0	0	0	0	0	0	0	0	0	8	0.000147475	0.625	0.0623501	0.116883	0.88	2.32494
Sobic.001G172200.1	SoRiov21032152m.g	Sobic.001G172200	0	3	1	96	3	0	0	0	0	0	0	0	23	0	0	0	3	1	0	0	0	2	0	0	0	0	1	68	0.000158557	0	0	0	0.0458716	0
Sobic.001G012300.1	SoRiov21000157m.g	Sobic.001G012300	0	3	1	150	5	0	0	2	0	0	0	0	8	0	0	0	0	1	0	0	0	0	0	0	0	0	3	135	0.000178515	1.46719	1.73929	4.54218	5.34545	1.15656
Sobic.004G024400.1	SoRiov21024575m.g	Sobic.004G024400	0	1	3	130	0	0	0	1	0	1	0	0	59	0	0	0	13	2	0	0	0	0	0	0	0	0	1	57	0.000202023	0.112621	0.54	0.390426	0.85017	1.53043
Sobic.003G424400.1	SoRiov21023932m.g	Sobic.003G424400	1	10	14	95	1	0	0	0	0	1	0	1	4	0	1	0	25	12	0	0	0	0	0	0	0	0	10	65	0.00024165	1.66474	0.962264	2.87248	1.49429	8.62725
Sobic.005G033801.1	SoRiov21029785m.g	Sobic.005G033801	0	3	1	145	0	0	0	0	0	0	0	0	122	0	0	0	0	1	0	0	0	0	0	0	0	0	3	23	0.000266346	Inf	0.734317	0.165049	1.63636	0.4
Sobic.006G128200.1	SoRiov21034753m.g	Sobic.006G128200	0	4	4	241	21	0	0	3	0	2	0	0	194	0	0	0	0	2	0	0	0	0	0	0	0	0	4	23	0.000287086	4.29167	2.34091	1.56098	5.57426	8.42286
Sobic.005G103200.2	SoRiov21030780m.g	Sobic.005G103200	1	1	0	82	2	0	0	0	0	0	0	0	48	0	1	0	6	0	0	0	0	0	0	0	0	0	1	26	0.000302569	Inf	0.708333	Inf	Inf	1.05143
Sobic.005G038500.1	SoRiov21029860m.g	Sobic.005G038500	0	7	5	107	1	1	0	10	0	0	0	0	7	0	0	0	0	5	0	0	0	0	0	0	0	0	6	89	0.000336815	1.3553	2.42652	1.87783	1.07692	0.701333
Sobic.004G159100.1	SoRiov21026582m.g	Sobic.004G159100	0	1	2	80	0	0	0	8	0	0	0	0	27	0	0	0	3	2	0	0	0	1	0	0	0	0	1	42	0.000340134	20.5	2.28	2.20395	0.801653	2.11888
Sobic.004G297600.1	SoRiov21028473m.g	Sobic.004G297600	0	2	2	51	5	0	0	2	0	0	0	1	0	0	0	0	0	1	0	0	0	0	0	0	0	0	2	44	0.000359633	3.09901	0.663957	0.339157	1.19811	5.72464
Sobic.002G397600.1	SoRiov21017448m.g	Sobic.002G397600	0	0	1	41	0	0	0	0	0	0	0	0	5	0	0	0	2	1	0	0	0	0	0	0	0	0	0	34	0.000364256	0.978355	0.603093	0.191411	0.538018	1.18837
Sobic.009G016600.1	SoRiov21043411m.g	Sobic.009G016600	0	6	9	74	31	0	0	4	2	0	1	3	22	0	0	0	6	3	0	0	0	1	0	0	0	0	5	12	0.000368117	3.43641	0.310345	2	2.30662	2.85223
Sobic.002G407300.3	SoRiov21017567m.g	Sobic.002G407300	0	0	1	274	0	0	0	15	0	0	0	0	91	0	0	0	2	1	0	0	0	0	0	0	0	0	0	166	0.000371237	0	3	0.242424	1.03704	3.22857
Sobic.003G397300.1	SoRiov21023574m.g	Sobic.003G397300	0	3	3	179	2	0	0	0	0	1	0	0	159	0	0	0	0	2	0	0	0	0	0	0	0	0	3	18	0.000378192	12.3085	0.941176	0	1.66667	0.92
Sobic.009G022700.1	SoRiov21043493m.g	Sobic.009G022700	0	1	1	63	1	1	0	1	0	1	0	0	31	0	0	0	17	0	0	0	0	0	0	0	0	0	0	13	0.000419039	1.49612	2.13636	0	0	1.68797
Sobic.005G087400.4	SoRiov21030545m.g	Sobic.005G087400	0	10	8	254	2	0	0	0	0	0	0	0	130	0	0	0	94	8	0	0	0	3	0	0	0	0	8	30	0.000420813	2.96525	0.37037	1.31269	1.33951	1.23944
Sobic.005G165500.1	SoRiov21031888m.g	Sobic.005G165500	0	19	11	66	0	0	0	1	1	0	0	0	5	0	0	0	38	10	0	0	0	1	0	0	0	0	18	23	0.000420813	3.50825	0.246324	0.504283	1.85647	7
Sobic.004G112100.1	SoRiov21025796m.g	Sobic.004G112100	0	4	1	37	1	1	0	5	0	0	0	0	12	0	0	0	19	1	0	0	0	2	0	0	0	0	1	2	0.000573196	0.768879	0.310502	0.342733	0.258333	0.707602
Sobic.003G400200.1	SoRiov21023612m.g	Sobic.003G400200	0	5	4	273	4	0	0	1	0	0	0	0	188	0	0	0	0	4	0	0	0	0	0	0	0	0	5	80	0.000611149	0.64	0.635452	1.66176	2.47486	9.5
Sobic.002G407500.1	SoRiov21017571m.g	Sobic.002G407500	0	0	1	96	4	0	0	0	0	0	0	0	91	0	0	0	0	1	0	0	0	0	0	0	0	0	0	1	0.000727359	10.5	1.88	0.271186	1.8375	Inf
Sobic.001G538100.1	SoRiov21007619m.g	Sobic.001G538100	0	14	19	200	11	0	0	6	1	0	0	0	32	0	0	0	17	18	0	0	0	0	0	0	0	0	14	134	0.000743109	2.67368	1.05074	4.24405	1.48023	3.0429
Sobic.002G220600.1	SoRiov21015069m.g	Sobic.002G220600	1	0	5	241	3	0	0	0	0	0	0	1	184	0	1	0	22	4	0	0	0	0	0	0	0	0	0	32	0.000800158	1.48485	0.169492	0.646996	0.311487	0.609562
Sobic.005G036000.1	SoRiov21029818m.g	Sobic.005G036000	0	2	2	262	8	0	0	1	1	0	0	0	105	0	0	0	0	1	0	0	0	0	0	0	0	0	2	148	0.000867363	0.407407	0.0596154	0.843373	0.173554	1.68235
Sobic.001G511000.2	SoRiov21007246m.g	Sobic.001G511000	0	3	1	226	0	0	0	1	0	1	0	0	22	0	0	0	140	0	0	0	0	2	0	0	0	0	1	65	0.000900751	1.76879	3.07955	1.46181	0.345073	4.24153
Sobic.003G109900.2	SoRiov21019419m.g	Sobic.003G109900	0	2	3	322	8	0	0	13	0	0	0	0	255	0	0	0	11	3	0	0	0	1	0	0	0	0	1	36	0.000913717	1.52632	1.25729	1.12737	0.37967	1.04468
Sobic.009G009000.1	SoRiov21043305m.g	Sobic.009G009000	0	1	2	31	0	0	0	0	0	1	0	0	11	0	0	0	12	1	0	0	0	0	0	0	0	0	1	8	0.000942094	0.852941	0.00323102	0.0412371	0	0
