# Supplementary material for: A new reference genome for Sorghum bicolor reveals high levels of sequence similarity between sweet and grain genotypes: implications for the genetics of sugar metabolism
Source: BMC Genomics. 2019 May 27;20:420. doi: 10.1186/s12864-019-5734-x (PMC6537160; doi:10.1186/s12864-019-5734-x)
Supplement: Supplementary file 10 — Table S8. Predicted conserved domain mutations in protein sequences from the most differentially expressed genes. Genes are restricted to those with the alternate allele in the RIL. Only the top 50 DEGs in each tissue were considered. Only genes with at least one AA mutation in a conserved region are shown. Protein sequences from BTx and Rio were aligned with MUSCLE, using the msa R package from Bioconductor. CDD regions were predicted using the BTx sequences in NCBI’s batch web CD-Search tool (https://www.ncbi.nlm.nih.gov/Structure/bwrpsb/bwrpsb.cgi). Positions refer to the residue position within BTx. (XLSX 60 kb) [file 12864_2019_5734_MOESM10_ESM.xlsx]

## Sheet: SuppTable8_AAmutations_topDEGs
GeneID	Position	BTx	Rio	CDD	Features
Sobic.009G250800.1	55	G	V	Pgu1,Glyco_hydro_28 superfamily,PLN02188,PL-6 superfamily	NA
Sobic.009G250800.1	424	P	S	PLN02188,PL-6 superfamily	NA
Sobic.004G036200.1	5	F	-	PLN02668	NA
Sobic.004G036200.1	6	H	-	PLN02668	NA
Sobic.004G036200.1	7	M	-	PLN02668	NA
Sobic.004G036200.1	8	T	-	PLN02668	NA
Sobic.004G036200.1	9	E	-	PLN02668	NA
Sobic.004G036200.1	10	G	-	PLN02668	NA
Sobic.004G036200.1	11	E	-	PLN02668	NA
Sobic.004G036200.1	12	G	-	PLN02668	NA
Sobic.004G036200.1	13	E	-	PLN02668	NA
Sobic.004G036200.1	14	W	-	PLN02668	NA
Sobic.004G036200.1	15	S	-	PLN02668	NA
Sobic.004G036200.1	16	Y	-	PLN02668	NA
Sobic.004G036200.1	17	S	-	PLN02668	NA
Sobic.004G036200.1	18	K	-	PLN02668	NA
Sobic.004G036200.1	19	N	-	PLN02668	NA
Sobic.004G036200.1	20	S	-	PLN02668	NA
Sobic.004G036200.1	21	R	-	PLN02668	NA
Sobic.004G036200.1	22	R	-	PLN02668	NA
Sobic.004G036200.1	23	Q	-	PLN02668	NA
Sobic.004G036200.1	24	E	-	PLN02668	NA
Sobic.004G036200.1	25	I	-	PLN02668	NA
Sobic.004G036200.1	26	F	-	PLN02668	NA
Sobic.004G036200.1	27	F	-	PLN02668	NA
Sobic.004G036200.1	28	L	-	PLN02668	NA
Sobic.004G036200.1	29	E	-	PLN02668	NA
Sobic.004G036200.1	30	T	-	PLN02668	NA
Sobic.004G036200.1	31	R	-	PLN02668	NA
Sobic.004G036200.1	32	P	-	PLN02668	NA
Sobic.004G036200.1	33	M	-	PLN02668	NA
Sobic.004G036200.1	34	I	-	PLN02668	NA
Sobic.004G036200.1	35	E	-	PLN02668	NA
Sobic.004G036200.1	36	N	-	PLN02668	NA
Sobic.004G036200.1	37	A	-	Methyltransf_7,Methyltransf_7 superfamily,PLN02668	NA
Sobic.004G036200.1	38	I	-	Methyltransf_7,Methyltransf_7 superfamily,PLN02668	NA
Sobic.004G036200.1	39	K	-	Methyltransf_7,Methyltransf_7 superfamily,PLN02668	NA
Sobic.004G036200.1	40	E	-	Methyltransf_7,Methyltransf_7 superfamily,PLN02668	NA
Sobic.004G036200.1	41	V	-	Methyltransf_7,Methyltransf_7 superfamily,PLN02668	NA
Sobic.004G036200.1	42	Y	-	Methyltransf_7,Methyltransf_7 superfamily,PLN02668	NA
Sobic.004G036200.1	43	T	-	Methyltransf_7,Methyltransf_7 superfamily,PLN02668	NA
Sobic.004G036200.1	44	T	-	Methyltransf_7,Methyltransf_7 superfamily,PLN02668	NA
Sobic.004G036200.1	45	L	-	Methyltransf_7,Methyltransf_7 superfamily,PLN02668	NA
Sobic.004G036200.1	46	L	-	Methyltransf_7,Methyltransf_7 superfamily,PLN02668	NA
Sobic.004G036200.1	47	P	-	Methyltransf_7,Methyltransf_7 superfamily,PLN02668	NA
Sobic.004G036200.1	48	K	-	Methyltransf_7,Methyltransf_7 superfamily,PLN02668	NA
Sobic.004G036200.1	49	T	-	Methyltransf_7,Methyltransf_7 superfamily,PLN02668	NA
Sobic.004G036200.1	50	M	-	Methyltransf_7,Methyltransf_7 superfamily,PLN02668	NA
Sobic.004G036200.1	51	I	-	Methyltransf_7,Methyltransf_7 superfamily,PLN02668	NA
Sobic.004G036200.1	52	I	-	Methyltransf_7,Methyltransf_7 superfamily,PLN02668	NA
Sobic.004G036200.1	53	A	-	Methyltransf_7,Methyltransf_7 superfamily,PLN02668	NA
Sobic.004G036200.1	54	D	-	Methyltransf_7,Methyltransf_7 superfamily,PLN02668	NA
Sobic.004G036200.1	55	L	-	Methyltransf_7,Methyltransf_7 superfamily,PLN02668	NA
Sobic.004G036200.1	56	G	-	Methyltransf_7,Methyltransf_7 superfamily,PLN02668	NA
Sobic.004G036200.1	57	C	-	Methyltransf_7,Methyltransf_7 superfamily,PLN02668	NA
Sobic.004G036200.1	58	S	-	Methyltransf_7,Methyltransf_7 superfamily,PLN02668	NA
Sobic.004G036200.1	59	S	-	Methyltransf_7,Methyltransf_7 superfamily,PLN02668	NA
Sobic.004G036200.1	60	G	-	Methyltransf_7,Methyltransf_7 superfamily,PLN02668	NA
Sobic.004G036200.1	61	P	-	Methyltransf_7,Methyltransf_7 superfamily,PLN02668	NA
Sobic.004G036200.1	62	N	-	Methyltransf_7,Methyltransf_7 superfamily,PLN02668	NA
Sobic.004G036200.1	63	T	-	Methyltransf_7,Methyltransf_7 superfamily,PLN02668	NA
Sobic.004G036200.1	64	M	-	Methyltransf_7,Methyltransf_7 superfamily,PLN02668	NA
Sobic.004G036200.1	65	L	-	Methyltransf_7,Methyltransf_7 superfamily,PLN02668	NA
Sobic.004G036200.1	66	F	-	Methyltransf_7,Methyltransf_7 superfamily,PLN02668	NA
Sobic.004G036200.1	67	I	-	Methyltransf_7,Methyltransf_7 superfamily,PLN02668	NA
Sobic.004G036200.1	68	S	-	Methyltransf_7,Methyltransf_7 superfamily,PLN02668	NA
Sobic.004G036200.1	69	S	-	Methyltransf_7,Methyltransf_7 superfamily,PLN02668	NA
Sobic.004G036200.1	70	V	-	Methyltransf_7,Methyltransf_7 superfamily,PLN02668	NA
Sobic.004G036200.1	71	I	-	Methyltransf_7,Methyltransf_7 superfamily,PLN02668	NA
Sobic.004G036200.1	72	N	-	Methyltransf_7,Methyltransf_7 superfamily,PLN02668	NA
Sobic.004G036200.1	73	I	-	Methyltransf_7,Methyltransf_7 superfamily,PLN02668	NA
Sobic.004G036200.1	74	I	-	Methyltransf_7,Methyltransf_7 superfamily,PLN02668	NA
Sobic.004G036200.1	75	V	-	Methyltransf_7,Methyltransf_7 superfamily,PLN02668	NA
Sobic.004G036200.1	76	E	-	Methyltransf_7,Methyltransf_7 superfamily,PLN02668	NA
Sobic.004G036200.1	77	K	-	Methyltransf_7,Methyltransf_7 superfamily,PLN02668	NA
Sobic.004G036200.1	78	C	-	Methyltransf_7,Methyltransf_7 superfamily,PLN02668	NA
Sobic.004G036200.1	79	K	-	Methyltransf_7,Methyltransf_7 superfamily,PLN02668	NA
Sobic.004G036200.1	80	S	-	Methyltransf_7,Methyltransf_7 superfamily,PLN02668	NA
Sobic.004G036200.1	81	T	-	Methyltransf_7,Methyltransf_7 superfamily,PLN02668	NA
Sobic.004G036200.1	82	G	-	Methyltransf_7,Methyltransf_7 superfamily,PLN02668	NA
Sobic.004G036200.1	83	D	-	Methyltransf_7,Methyltransf_7 superfamily,PLN02668	NA
Sobic.004G036200.1	84	D	-	Methyltransf_7,Methyltransf_7 superfamily,PLN02668	NA
Sobic.004G036200.1	85	C	-	Methyltransf_7,Methyltransf_7 superfamily,PLN02668	NA
Sobic.004G036200.1	86	M	-	Methyltransf_7,Methyltransf_7 superfamily,PLN02668	NA
Sobic.004G036200.1	87	E	-	Methyltransf_7,Methyltransf_7 superfamily,PLN02668	NA
Sobic.004G036200.1	88	L	-	Methyltransf_7,Methyltransf_7 superfamily,PLN02668	NA
Sobic.004G036200.1	89	Q	-	Methyltransf_7,Methyltransf_7 superfamily,PLN02668	NA
Sobic.004G036200.1	90	F	-	Methyltransf_7,Methyltransf_7 superfamily,PLN02668	NA
Sobic.004G036200.1	91	F	-	Methyltransf_7,Methyltransf_7 superfamily,PLN02668	NA
Sobic.004G036200.1	92	L	-	Methyltransf_7,Methyltransf_7 superfamily,PLN02668	NA
Sobic.004G036200.1	93	N	-	Methyltransf_7,Methyltransf_7 superfamily,PLN02668	NA
Sobic.004G036200.1	94	D	M	Methyltransf_7,Methyltransf_7 superfamily,PLN02668	NA
Sobic.004G036200.1	95	L	V	Methyltransf_7,Methyltransf_7 superfamily,PLN02668	NA
Sobic.004G036200.1	263	L	I	Methyltransf_7,Methyltransf_7 superfamily,PLN02668	NA
Sobic.004G036200.1	310	T	A	Methyltransf_7,Methyltransf_7 superfamily,PLN02668	NA
Sobic.002G075800.1	285	D	-	PLN02219,AmyAc_family superfamily,Raffinose_syn	NA
Sobic.002G075800.1	286	G	-	PLN02219,AmyAc_family superfamily,Raffinose_syn	NA
Sobic.002G075800.1	399	G	S	PLN02219,AmyAc_family superfamily,Raffinose_syn	NA
Sobic.002G075800.1	616	G	N	PLN02219,AmyAc_family superfamily,Raffinose_syn	NA
Sobic.002G075800.1	617	N	D	PLN02219,AmyAc_family superfamily,Raffinose_syn	NA
Sobic.002G075800.1	618	D	G	PLN02219,AmyAc_family superfamily,Raffinose_syn	NA
Sobic.002G075800.1	619	G	E	PLN02219,AmyAc_family superfamily,Raffinose_syn	NA
Sobic.002G075800.1	620	D	E	PLN02219,AmyAc_family superfamily,Raffinose_syn	NA
Sobic.002G075800.1	623	S	-	PLN02219,AmyAc_family superfamily,Raffinose_syn	NA
Sobic.002G075800.1	624	N	-	PLN02219,AmyAc_family superfamily,Raffinose_syn	NA
Sobic.002G075800.1	625	G	-	PLN02219,AmyAc_family superfamily,Raffinose_syn	NA
Sobic.002G075800.1	626	E	-	PLN02219,AmyAc_family superfamily,Raffinose_syn	NA
Sobic.002G075800.1	753	K	Q	PLN02219,AmyAc_family superfamily	NA
Sobic.006G249400.1	21	G	A	PLN03036,Gln-synt_C superfamily	NA
Sobic.006G249400.1	22	-	G	PLN03036,Gln-synt_C superfamily	NA
Sobic.006G249400.1	88	V	Y	PLN03036,Gln-synt_C superfamily,GlnA,Gln-synt_N,Gln-synt_N superfamily	NA
Sobic.006G249400.1	89	G	V	PLN03036,Gln-synt_C superfamily,GlnA,Gln-synt_N,Gln-synt_N superfamily	NA
Sobic.006G249400.1	90	G	R	PLN03036,Gln-synt_C superfamily,GlnA,Gln-synt_N,Gln-synt_N superfamily	NA
Sobic.006G249400.1	292	V	I	PLN03036,Gln-synt_C superfamily,GlnA	NA
Sobic.006G249400.1	327	D	E	PLN03036,Gln-synt_C superfamily,GlnA	NA
Sobic.004G148600.1	326	E	-	TPR,TPR_11 superfamily	NA
Sobic.004G148600.1	327	E	-	TPR,TPR_11 superfamily	NA
Sobic.004G148600.1	328	E	-	TPR,TPR_11 superfamily	NA
Sobic.004G148600.1	329	E	-	TPR,TPR_11 superfamily	NA
Sobic.004G148600.1	330	R	-	TPR,TPR_11 superfamily	NA
Sobic.004G148600.1	331	K	-	TPR,TPR_11 superfamily	NA
Sobic.004G148600.1	332	G	-	TPR,TPR_11 superfamily	NA
Sobic.004G148600.1	333	A	-	TPR,TPR_11 superfamily	NA
Sobic.004G148600.1	334	A	-	TPR,TPR_11 superfamily	NA
Sobic.004G148600.1	335	D	-	TPR,TPR_11 superfamily	NA
Sobic.004G148600.1	336	Y	-	TPR,TPR_11 superfamily	NA
Sobic.004G148600.1	337	V	-	TPR,TPR_11 superfamily	NA
Sobic.004G148600.1	338	L	-	TPR,TPR_11 superfamily	NA
Sobic.004G148600.1	339	Q	-	TPR,TPR_11 superfamily	NA
Sobic.004G148600.1	340	F	-	TPR,TPR_11 superfamily	NA
Sobic.004G148600.1	341	I	-	TPR,TPR_11 superfamily	NA
Sobic.004G148600.1	342	R	-	TPR,TPR_11 superfamily	NA
Sobic.004G148600.1	343	P	-	TPR,TPR_11 superfamily	NA
Sobic.004G148600.1	344	T	-	TPR,TPR_11 superfamily	NA
Sobic.004G148600.1	345	P	-	TPR,TPR_11 superfamily	NA
Sobic.004G148600.1	346	T	-	TPR,TPR_11 superfamily	NA
Sobic.004G148600.1	347	H	-	TPR,TPR_11 superfamily	NA
Sobic.004G148600.1	348	R	-	TPR,TPR_11 superfamily	NA
Sobic.004G148600.1	404	M	L	PLN03088,PLN03088 superfamily,3a0801s09,TPR,TPR_11 superfamily
Sobic.006G232800.1	509	I	M	Mitofilin,Mitofilin superfamily	NA
Sobic.006G232800.1	514	M	K	Mitofilin,Mitofilin superfamily	NA
Sobic.001G525900.3	211	-	Q	POX,POX superfamily	NA
Sobic.001G525900.3	212	-	Q	POX,POX superfamily	NA
Sobic.001G525900.3	213	-	Q	POX,POX superfamily	NA
Sobic.002G104400.1	7	E	A	PHA03247,Atrophin-1 superfamily	NA
Sobic.002G104400.1	21	P	R	PHA03247,Atrophin-1 superfamily	NA
Sobic.002G104400.1	33	P	-	PHA03247,Atrophin-1 superfamily	NA
Sobic.002G104400.1	34	P	-	PHA03247,Atrophin-1 superfamily	NA
Sobic.002G104400.1	35	H	-	PHA03247,Atrophin-1 superfamily	NA
Sobic.002G104400.1	36	R	-	PHA03247,Atrophin-1 superfamily	NA
Sobic.002G104400.1	37	R	-	PHA03247,Atrophin-1 superfamily	NA
Sobic.002G104400.1	38	Q	-	PHA03247,Atrophin-1 superfamily	NA
Sobic.002G104400.1	48	D	A	PHA03247,Atrophin-1 superfamily	NA
Sobic.002G104400.1	50	R	T	PHA03247,Atrophin-1 superfamily	NA
Sobic.002G104400.1	51	M	R	PHA03247,Atrophin-1 superfamily	NA
Sobic.002G104400.1	62	V	I	PHA03247,Atrophin-1 superfamily	NA
Sobic.002G104400.1	67	Y	N	PHA03247,Atrophin-1 superfamily	NA
Sobic.002G104400.1	69	R	S	PHA03247,Atrophin-1 superfamily	NA
Sobic.002G104400.1	70	S	H	PHA03247,Atrophin-1 superfamily	NA
Sobic.002G104400.1	73	H	Q	PHA03247,Atrophin-1 superfamily	NA
Sobic.002G104400.1	74	L	Q	PHA03247,Atrophin-1 superfamily	NA
Sobic.002G104400.1	75	R	P	PHA03247,Atrophin-1 superfamily	NA
Sobic.002G104400.1	76	W	P	PHA03247,Atrophin-1 superfamily	NA
Sobic.002G104400.1	77	S	A	PHA03247,Atrophin-1 superfamily	NA
Sobic.002G104400.1	79	-	S	PHA03247,Atrophin-1 superfamily	NA
Sobic.002G104400.1	80	-	R	PHA03247,Atrophin-1 superfamily	NA
Sobic.002G104400.1	81	-	F	PHA03247,Atrophin-1 superfamily	NA
Sobic.002G104400.1	82	-	I	PHA03247,Atrophin-1 superfamily	NA
Sobic.002G104400.1	83	-	I	PHA03247,Atrophin-1 superfamily	NA
Sobic.002G104400.1	84	-	Y	PHA03247,Atrophin-1 superfamily	NA
Sobic.002G104400.1	85	-	D	PHA03247,Atrophin-1 superfamily	NA
Sobic.002G104400.1	86	-	A	PHA03247,Atrophin-1 superfamily	NA
Sobic.002G104400.1	87	-	S	PHA03247,Atrophin-1 superfamily	NA
Sobic.002G104400.1	88	V	P	PHA03247,Atrophin-1 superfamily	NA
Sobic.002G104400.1	90	E	L	PHA03247,Atrophin-1 superfamily	NA
Sobic.002G104400.1	92	H	D	PHA03247,Atrophin-1 superfamily	NA
Sobic.002G104400.1	93	C	V	PHA03247,Atrophin-1 superfamily	NA
Sobic.002G104400.1	96	T	A	PHA03247,Atrophin-1 superfamily	NA
Sobic.002G104400.1	105	H	L	PHA03247,Atrophin-1 superfamily	NA
Sobic.002G104400.1	116	-	S	PHA03247,Atrophin-1 superfamily	NA
Sobic.002G104400.1	117	C	S	PHA03247,Atrophin-1 superfamily	NA
Sobic.002G104400.1	118	T	M	PHA03247,Atrophin-1 superfamily	NA
Sobic.002G104400.1	125	-	R	PHA03247,Atrophin-1 superfamily	NA
Sobic.002G104400.1	127	S	P	PHA03247,Atrophin-1 superfamily	NA
Sobic.002G104400.1	130	W	V	PHA03247,Atrophin-1 superfamily	NA
Sobic.002G104400.1	132	-	S	PHA03247,Atrophin-1 superfamily	NA
Sobic.002G104400.1	133	-	P	PHA03247,Atrophin-1 superfamily	NA
Sobic.002G104400.1	137	R	Q	PHA03247,Atrophin-1 superfamily	NA
Sobic.002G104400.1	141	I	T	PHA03247,Atrophin-1 superfamily	NA
Sobic.002G104400.1	143	A	G	PHA03247,Atrophin-1 superfamily	NA
Sobic.002G104400.1	150	-	G	PHA03247,Atrophin-1 superfamily	NA
Sobic.002G104400.1	151	A	G	PHA03247,Atrophin-1 superfamily	NA
Sobic.002G104400.1	157	V	A	PHA03247,Atrophin-1 superfamily	NA
Sobic.002G104400.1	163	D	A	PHA03247,Atrophin-1 superfamily	NA
Sobic.002G104400.1	164	S	L	PHA03247,Atrophin-1 superfamily	NA
Sobic.002G104400.1	165	-	P	PHA03247,Atrophin-1 superfamily	NA
Sobic.002G104400.1	166	-	L	PHA03247,Atrophin-1 superfamily	NA
Sobic.002G104400.1	167	-	A	PHA03247,Atrophin-1 superfamily	NA
Sobic.002G104400.1	168	-	L	PHA03247,Atrophin-1 superfamily	NA
Sobic.002G104400.1	169	-	R	PHA03247,Atrophin-1 superfamily	NA
Sobic.002G104400.1	170	-	R	PHA03247,Atrophin-1 superfamily	NA
Sobic.002G104400.1	171	-	P	PHA03247,Atrophin-1 superfamily	NA
Sobic.002G104400.1	172	-	P	PHA03247,Atrophin-1 superfamily	NA
Sobic.002G104400.1	173	-	A	PHA03247,Atrophin-1 superfamily	NA
Sobic.002G104400.1	174	-	D	PHA03247,Atrophin-1 superfamily	NA
Sobic.002G104400.1	175	-	S	PHA03247,Atrophin-1 superfamily	NA
Sobic.002G104400.1	176	-	L	PHA03247,Atrophin-1 superfamily	NA
Sobic.002G104400.1	177	-	V	PHA03247,Atrophin-1 superfamily	NA
Sobic.002G104400.1	178	L	A	PHA03247,Atrophin-1 superfamily	NA
Sobic.002G104400.1	185	S	R	PHA03247,Atrophin-1 superfamily	NA
Sobic.002G104400.1	204	-	S	PHA03247,Atrophin-1 superfamily	NA
Sobic.002G104400.1	205	-	P	PHA03247,Atrophin-1 superfamily	NA
Sobic.002G104400.1	233	K	-	PHA03247,Atrophin-1 superfamily	NA
Sobic.002G104400.1	234	D	-	PHA03247,Atrophin-1 superfamily	NA
Sobic.002G104400.1	247	-	A	PHA03247,Atrophin-1 superfamily	NA
Sobic.002G104400.1	248	-	A	PHA03247,Atrophin-1 superfamily	NA
Sobic.002G104400.1	255	Q	R	PHA03247,Atrophin-1 superfamily	NA
Sobic.002G104400.1	270	P	T	PHA03247,Atrophin-1 superfamily	NA
Sobic.002G104400.1	274	P	A	PHA03247,Atrophin-1 superfamily	NA
Sobic.002G104400.1	283	A	P	PHA03247,Atrophin-1 superfamily	NA
Sobic.002G104400.1	285	G	R	PHA03247,Atrophin-1 superfamily	NA
Sobic.002G104400.1	288	E	G	PHA03247,Atrophin-1 superfamily	NA
Sobic.002G104400.1	289	N	-	PHA03247,Atrophin-1 superfamily	NA
Sobic.005G082100.1	574	R	S	PLN02170,Pectinesterase superfamily,Pectinesterase	NA
Sobic.005G082100.1	589	G	A	PLN02170,Pectinesterase superfamily	NA
Sobic.005G082100.1	593	N	S	PLN02170,Pectinesterase superfamily	NA
Sobic.009G235700.1	185	I	V	Sugar_tr,Sugar_tr superfamily,SP,xylE,MFS,MFS superfamily,AraJ,MFS_1 superfamily	NA
Sobic.009G235700.1	290	H	R	Sugar_tr,Sugar_tr superfamily,SP,xylE,MFS,MFS superfamily	NA
Sobic.009G235700.1	484	M	I	Sugar_tr,Sugar_tr superfamily,SP,xylE,MFS,MFS superfamily	NA
Sobic.009G235700.1	489	C	W	Sugar_tr,Sugar_tr superfamily,SP,xylE,MFS,MFS superfamily	NA
Sobic.005G062700.1	74	K	E	PRK11190	NA
Sobic.005G062700.1	109	M	V	NifU,NifU superfamily,NifU_proper,IscU_like superfamily,PRK11190	NA
Sobic.007G211200.1	163	L	F	PLN00113,PLN00113 superfamily,LRR_8,LRR_8 superfamily,LRR,LRR_RI,LRR_RI superfamily
Sobic.007G211200.1	322	P	S	PLN00113,PLN00113 superfamily	NA
Sobic.006G271300.1	91	V	A	C2_putative_Elicitor-responsive_gene,C2 superfamily,C2,COG5038,SMP_LBD superfamily	NA
Sobic.008G059900.2	142	-	P	PRK11856,E3_binding superfamily,AceF,PDHac_trf_mito	NA
Sobic.008G059900.2	143	-	P	PRK11856,E3_binding superfamily,AceF,PDHac_trf_mito	NA
Sobic.003G084200.1	707	V	L	DUF4378,DUF4378 superfamily	NA
Sobic.003G084200.1	715	-	T	DUF4378,DUF4378 superfamily	NA
Sobic.003G084200.1	739	G	-	DUF4378,DUF4378 superfamily	NA
Sobic.003G084200.1	801	K	N	DUF4378,DUF4378 superfamily	NA
Sobic.003G084200.1	827	A	G	DUF4378,DUF4378 superfamily	NA
Sobic.004G296300.1	41	E	S	frlA	NA
Sobic.004G296300.1	42	E	P	PotE,frlA	NA
Sobic.004G296300.1	43	A	Q	PotE,frlA	NA
Sobic.004G296300.1	44	N	T	2A0303,AA_permease_2 superfamily,PotE,frlA	NA
Sobic.004G296300.1	45	D	P	2A0303,AA_permease_2 superfamily,PotE,frlA	NA
Sobic.004G296300.1	46	H	W	2A0303,AA_permease_2 superfamily,PotE,frlA	NA
Sobic.004G296300.1	48	S	K	2A0303,AA_permease_2 superfamily,PotE,AA_permease_2,frlA	NA
Sobic.004G296300.1	49	S	P	2A0303,AA_permease_2 superfamily,PotE,AA_permease_2,frlA	NA
Sobic.004G296300.1	50	S	T	2A0303,AA_permease_2 superfamily,PotE,AA_permease_2,frlA	NA
Sobic.004G296300.1	52	A	T	2A0303,AA_permease_2 superfamily,PotE,AA_permease_2,frlA	NA
Sobic.004G296300.1	54	R	P	2A0303,AA_permease_2 superfamily,PotE,AA_permease_2,frlA	NA
Sobic.004G296300.1	56	-	P	2A0303,AA_permease_2 superfamily,PotE,AA_permease_2,frlA	NA
Sobic.004G296300.1	57	-	P	2A0303,AA_permease_2 superfamily,PotE,AA_permease_2,frlA	NA
Sobic.004G296300.1	58	-	P	2A0303,AA_permease_2 superfamily,PotE,AA_permease_2,frlA	NA
Sobic.004G296300.1	59	-	A	2A0303,AA_permease_2 superfamily,PotE,AA_permease_2,frlA	NA
Sobic.004G296300.1	60	F	A	2A0303,AA_permease_2 superfamily,PotE,AA_permease_2,frlA	NA
Sobic.004G296300.1	61	L	P	2A0303,AA_permease_2 superfamily,PotE,AA_permease_2,frlA	NA
Sobic.004G296300.1	63	G	S	2A0303,AA_permease_2 superfamily,PotE,AA_permease_2,frlA	NA
Sobic.004G296300.1	64	F	L	2A0303,AA_permease_2 superfamily,PotE,AA_permease_2,frlA	NA
Sobic.004G296300.1	65	C	A	2A0303,AA_permease_2 superfamily,PotE,AA_permease_2,frlA	NA
Sobic.004G296300.1	66	A	S	2A0303,AA_permease_2 superfamily,PotE,AA_permease_2,frlA	NA
Sobic.004G296300.1	68	A	P	2A0303,AA_permease_2 superfamily,PotE,AA_permease_2,frlA	NA
Sobic.004G296300.1	69	L	R	2A0303,AA_permease_2 superfamily,PotE,AA_permease_2,frlA	NA
Sobic.004G296300.1	71	-	S	2A0303,AA_permease_2 superfamily,PotE,AA_permease_2,frlA	NA
Sobic.004G296300.1	72	-	A	2A0303,AA_permease_2 superfamily,PotE,AA_permease_2,frlA	NA
Sobic.004G296300.1	73	-	A	2A0303,AA_permease_2 superfamily,PotE,AA_permease_2,frlA	NA
Sobic.004G296300.1	74	-	S	2A0303,AA_permease_2 superfamily,PotE,AA_permease_2,frlA	NA
Sobic.004G296300.1	75	-	P	2A0303,AA_permease_2 superfamily,PotE,AA_permease_2,frlA	NA
Sobic.004G296300.1	76	-	S	2A0303,AA_permease_2 superfamily,PotE,AA_permease_2,frlA	NA
Sobic.004G296300.1	77	-	A	2A0303,AA_permease_2 superfamily,PotE,AA_permease_2,frlA	NA
Sobic.004G296300.1	78	-	P	2A0303,AA_permease_2 superfamily,PotE,AA_permease_2,frlA	NA
Sobic.004G296300.1	79	-	T	2A0303,AA_permease_2 superfamily,PotE,AA_permease_2,frlA	NA
Sobic.004G296300.1	80	-	A	2A0303,AA_permease_2 superfamily,PotE,AA_permease_2,frlA	NA
Sobic.004G296300.1	81	-	P	2A0303,AA_permease_2 superfamily,PotE,AA_permease_2,frlA	NA
Sobic.004G296300.1	82	-	P	2A0303,AA_permease_2 superfamily,PotE,AA_permease_2,frlA	NA
Sobic.004G296300.1	83	-	P	2A0303,AA_permease_2 superfamily,PotE,AA_permease_2,frlA	NA
Sobic.004G296300.1	84	-	P	2A0303,AA_permease_2 superfamily,PotE,AA_permease_2,frlA	NA
Sobic.004G296300.1	85	-	P	2A0303,AA_permease_2 superfamily,PotE,AA_permease_2,frlA	NA
Sobic.004G296300.1	86	-	A	2A0303,AA_permease_2 superfamily,PotE,AA_permease_2,frlA	NA
Sobic.004G296300.1	88	K	A	2A0303,AA_permease_2 superfamily,PotE,AA_permease_2,frlA	NA
Sobic.004G296300.1	89	P	S	2A0303,AA_permease_2 superfamily,PotE,AA_permease_2,frlA	NA
Sobic.004G296300.1	90	L	C	2A0303,AA_permease_2 superfamily,PotE,AA_permease_2,frlA	NA
Sobic.004G296300.1	92	A	S	2A0303,AA_permease_2 superfamily,PotE,AA_permease_2,frlA	NA
Sobic.004G296300.1	93	H	S	2A0303,AA_permease_2 superfamily,PotE,AA_permease_2,frlA	NA
Sobic.004G296300.1	94	G	A	2A0303,AA_permease_2 superfamily,PotE,AA_permease_2,frlA	NA
Sobic.004G296300.1	95	S	P	2A0303,AA_permease_2 superfamily,PotE,AA_permease_2,frlA	NA
Sobic.004G296300.1	96	A	L	2A0303,AA_permease_2 superfamily,PotE,AA_permease_2,frlA	NA
Sobic.004G296300.1	97	A	S	2A0303,AA_permease_2 superfamily,PotE,AA_permease_2,frlA	NA
Sobic.004G296300.1	98	A	S	2A0303,AA_permease_2 superfamily,PotE,AA_permease_2,frlA	NA
Sobic.004G296300.1	99	T	C	2A0303,AA_permease_2 superfamily,PotE,AA_permease_2,frlA	NA
Sobic.004G296300.1	100	G	C	2A0303,AA_permease_2 superfamily,PotE,AA_permease_2,frlA	NA
Sobic.004G296300.1	101	E	S	2A0303,AA_permease_2 superfamily,PotE,AA_permease_2,frlA	NA
Sobic.004G296300.1	103	L	S	2A0303,AA_permease_2 superfamily,PotE,AA_permease_2,frlA	NA
Sobic.004G296300.1	106	-	P	2A0303,AA_permease_2 superfamily,PotE,AA_permease_2,frlA	NA
Sobic.004G296300.1	107	-	S	2A0303,AA_permease_2 superfamily,PotE,AA_permease_2,frlA	NA
Sobic.004G296300.1	108	-	A	2A0303,AA_permease_2 superfamily,PotE,AA_permease_2,frlA	NA
Sobic.004G296300.1	109	-	P	2A0303,AA_permease_2 superfamily,PotE,AA_permease_2,frlA	NA
Sobic.004G296300.1	110	-	A	2A0303,AA_permease_2 superfamily,PotE,AA_permease_2,frlA	NA
Sobic.004G296300.1	111	-	Y	2A0303,AA_permease_2 superfamily,PotE,AA_permease_2,frlA	NA
Sobic.004G296300.1	112	-	L	2A0303,AA_permease_2 superfamily,PotE,AA_permease_2,frlA	NA
Sobic.004G296300.1	113	-	S	2A0303,AA_permease_2 superfamily,PotE,AA_permease_2,frlA	NA
Sobic.004G296300.1	114	-	S	2A0303,AA_permease_2 superfamily,PotE,AA_permease_2,frlA	NA
Sobic.004G296300.1	115	-	L	2A0303,AA_permease_2 superfamily,PotE,AA_permease_2,frlA	NA
Sobic.004G296300.1	116	-	A	2A0303,AA_permease_2 superfamily,PotE,AA_permease_2,frlA	NA
Sobic.004G296300.1	117	-	P	2A0303,AA_permease_2 superfamily,PotE,AA_permease_2,frlA	NA
Sobic.004G296300.1	118	-	S	2A0303,AA_permease_2 superfamily,PotE,AA_permease_2,frlA	NA
Sobic.004G296300.1	119	-	P	2A0303,AA_permease_2 superfamily,PotE,AA_permease_2,frlA	NA
Sobic.004G296300.1	120	-	A	2A0303,AA_permease_2 superfamily,PotE,AA_permease_2,frlA	NA
Sobic.004G296300.1	121	-	T	2A0303,AA_permease_2 superfamily,PotE,AA_permease_2,frlA	NA
Sobic.004G296300.1	122	-	P	2A0303,AA_permease_2 superfamily,PotE,AA_permease_2,frlA	NA
Sobic.004G296300.1	123	-	A	2A0303,AA_permease_2 superfamily,PotE,AA_permease_2,frlA	NA
Sobic.004G296300.1	125	L	K	2A0303,AA_permease_2 superfamily,PotE,AA_permease_2,frlA	NA
Sobic.004G296300.1	126	G	Q	2A0303,AA_permease_2 superfamily,PotE,AA_permease_2,frlA	NA
Sobic.004G296300.1	127	A	C	2A0303,AA_permease_2 superfamily,PotE,AA_permease_2,frlA	NA
Sobic.004G296300.1	128	V	N	2A0303,AA_permease_2 superfamily,PotE,AA_permease_2,frlA	NA
Sobic.004G296300.1	129	E	D	2A0303,AA_permease_2 superfamily,PotE,AA_permease_2,frlA	NA
Sobic.004G296300.1	130	L	A	2A0303,AA_permease_2 superfamily,PotE,AA_permease_2,frlA	NA
Sobic.004G296300.1	132	L	I	2A0303,AA_permease_2 superfamily,PotE,AA_permease_2,frlA	NA
Sobic.004G296300.1	135	I	D	2A0303,AA_permease_2 superfamily,PotE,AA_permease_2,frlA	NA
Sobic.004G296300.1	136	G	R	2A0303,AA_permease_2 superfamily,PotE,AA_permease_2,frlA	NA
Sobic.004G296300.1	137	A	S	2A0303,AA_permease_2 superfamily,PotE,AA_permease_2,frlA	NA
Sobic.004G296300.1	138	S	R	2A0303,AA_permease_2 superfamily,PotE,AA_permease_2,frlA	NA
Sobic.004G296300.1	139	I	L	2A0303,AA_permease_2 superfamily,PotE,AA_permease_2,frlA	NA
Sobic.004G296300.1	140	G	L	2A0303,AA_permease_2 superfamily,PotE,AA_permease_2,frlA	NA
Sobic.004G296300.1	141	A	W	2A0303,AA_permease_2 superfamily,PotE,AA_permease_2,frlA	NA
Sobic.004G296300.1	142	G	S	2A0303,AA_permease_2 superfamily,PotE,AA_permease_2,frlA	NA
Sobic.004G296300.1	144	F	T	2A0303,AA_permease_2 superfamily,PotE,AA_permease_2,frlA	NA
Sobic.004G296300.1	145	V	E	2A0303,AA_permease_2 superfamily,PotE,AA_permease_2,frlA	NA
Sobic.004G296300.1	147	T	L	2A0303,AA_permease_2 superfamily,PotE,AA_permease_2,frlA	NA
Sobic.004G296300.1	148	G	D	2A0303,AA_permease_2 superfamily,PotE,AA_permease_2,frlA	NA
Sobic.004G296300.1	149	T	C	2A0303,AA_permease_2 superfamily,PotE,AA_permease_2,frlA	NA
Sobic.004G296300.1	150	V	L	2A0303,AA_permease_2 superfamily,PotE,AA_permease_2,frlA	NA
Sobic.004G296300.1	152	R	T	2A0303,AA_permease_2 superfamily,PotE,AA_permease_2,frlA	NA
Sobic.004G296300.1	153	D	S	2A0303,AA_permease_2 superfamily,PotE,AA_permease_2,frlA	NA
Sobic.004G296300.1	154	A	N	2A0303,AA_permease_2 superfamily,PotE,AA_permease_2,frlA	NA
Sobic.004G296300.1	155	G	A	2A0303,AA_permease_2 superfamily,PotE,AA_permease_2,frlA	NA
Sobic.004G296300.1	157	G	S	2A0303,AA_permease_2 superfamily,PotE,AA_permease_2,frlA	NA
Sobic.002G067000.1	354	-	E	AAA,P-loop_NTPase superfamily,SpoVK,TIP49 superfamily,PTZ00361,CDC48,AAA superfamily	NA
Sobic.004G128600.1	69	L	V	DREPP,DREPP superfamily	NA
Sobic.001G013400.1	65	L	F	Nuf2,Nuf2 superfamily	NA
Sobic.001G013400.1	417	Y	C	Smc,SMC_N superfamily,PTZ00121,Neuromodulin_N superfamily	NA
Sobic.006G177000.1	36	A	V	PLN03195,p450 superfamily,p450,CypX	NA
Sobic.003G109832.1	48	-	R	PLN02290,p450 superfamily	NA
Sobic.003G109832.1	49	-	T	PLN02290,p450 superfamily	NA
Sobic.003G109832.1	50	-	A	PLN02290,p450 superfamily	NA
Sobic.003G109832.1	51	-	V	PLN02290,p450 superfamily	NA
Sobic.003G109832.1	52	-	Q	PLN02290,p450 superfamily	NA
Sobic.003G109832.1	53	-	R	PLN02290,p450 superfamily	NA
Sobic.003G109832.1	54	-	V	PLN02290,p450 superfamily	NA
Sobic.003G109832.1	55	-	T	PLN02290,p450 superfamily	NA
Sobic.003G109832.1	56	-	S	PLN02290,p450 superfamily	NA
Sobic.003G109832.1	57	-	L	PLN02290,p450 superfamily	NA
Sobic.003G109832.1	58	-	E	PLN02290,p450 superfamily	NA
Sobic.003G109832.1	59	-	F	PLN02290,p450 superfamily	NA
Sobic.003G109832.1	60	-	S	PLN02290,p450 superfamily	NA
Sobic.003G109832.1	61	-	S	PLN02290,p450 superfamily	NA
Sobic.003G109832.1	62	-	V	PLN02290,p450 superfamily	NA
Sobic.003G109832.1	63	-	A	PLN02290,p450 superfamily	NA
Sobic.003G109832.1	64	-	A	PLN02290,p450 superfamily	NA
Sobic.003G109832.1	65	-	S	PLN02290,p450 superfamily	NA
Sobic.003G109832.1	66	-	Q	PLN02290,p450 superfamily	NA
Sobic.003G109832.1	67	-	V	PLN02290,p450 superfamily	NA
Sobic.003G109832.1	89	Q	-	PLN02290,p450 superfamily,p450	NA
Sobic.003G109832.1	245	I	N	PLN02290,p450 superfamily,p450,CypX	NA
Sobic.003G109832.1	246	H	P	PLN02290,p450 superfamily,p450,CypX	NA
Sobic.003G109832.1	247	Q	A	PLN02290,p450 superfamily,p450,CypX	NA
Sobic.003G109832.1	248	P	F	PLN02290,p450 superfamily,p450,CypX	NA
Sobic.003G109832.1	249	R	H	PLN02290,p450 superfamily,p450,CypX	NA
Sobic.003G109832.1	251	P	D	PLN02290,p450 superfamily,p450,CypX	NA
Sobic.003G109832.1	252	S	K	PLN02290,p450 superfamily,p450,CypX	NA
Sobic.003G109832.1	253	R	-	PLN02290,p450 superfamily,p450,CypX	NA
Sobic.003G109832.1	254	Q	-	PLN02290,p450 superfamily,p450,CypX	NA
Sobic.003G109832.1	255	A	-	PLN02290,p450 superfamily,p450,CypX	NA
Sobic.003G109832.1	256	Q	-	PLN02290,p450 superfamily,p450,CypX	NA
Sobic.003G109832.1	257	G	-	PLN02290,p450 superfamily,p450,CypX	NA
Sobic.003G109832.1	258	L	-	PLN02290,p450 superfamily,p450,CypX	NA
Sobic.003G109832.1	259	N	-	PLN02290,p450 superfamily,p450,CypX	NA
Sobic.003G109832.1	260	Q	-	PLN02290,p450 superfamily,p450,CypX	NA
Sobic.003G109832.1	261	S	-	PLN02290,p450 superfamily,p450,CypX	NA
Sobic.003G109832.1	262	T	-	PLN02290,p450 superfamily,p450,CypX	NA
Sobic.003G109832.1	263	K	-	PLN02290,p450 superfamily,p450,CypX	NA
Sobic.003G109832.1	264	P	-	PLN02290,p450 superfamily,p450,CypX	NA
Sobic.003G109832.1	265	L	-	PLN02290,p450 superfamily,p450,CypX	NA
Sobic.003G109832.1	266	S	-	PLN02290,p450 superfamily,p450,CypX	NA
Sobic.003G109832.1	267	P	-	PLN02290,p450 superfamily,p450,CypX	NA
Sobic.003G109832.1	268	R	-	PLN02290,p450 superfamily,p450,CypX	NA
Sobic.003G109832.1	269	H	-	PLN02290,p450 superfamily,p450,CypX	NA
Sobic.003G109832.1	270	A	-	PLN02290,p450 superfamily,p450,CypX	NA
Sobic.003G109832.1	271	Y	-	PLN02290,p450 superfamily,p450,CypX	NA
Sobic.003G109832.1	272	I	-	PLN02290,p450 superfamily,p450,CypX	NA
Sobic.003G109832.1	273	R	-	PLN02290,p450 superfamily,p450,CypX	NA
Sobic.003G109832.1	274	S	-	PLN02290,p450 superfamily,p450,CypX	NA
Sobic.003G109832.1	275	S	-	PLN02290,p450 superfamily,p450,CypX	NA
Sobic.003G109832.1	276	E	-	PLN02290,p450 superfamily,p450,CypX	NA
Sobic.003G109832.1	277	H	-	PLN02290,p450 superfamily,p450,CypX	NA
Sobic.003G109832.1	278	V	-	PLN02290,p450 superfamily,p450,CypX	NA
Sobic.003G109832.1	279	R	-	PLN02290,p450 superfamily,p450,CypX	NA
Sobic.003G109832.1	280	L	-	PLN02290,p450 superfamily,p450,CypX	NA
Sobic.003G109832.1	281	S	-	PLN02290,p450 superfamily,p450,CypX	NA
Sobic.003G109832.1	282	E	-	PLN02290,p450 superfamily,p450,CypX	NA
Sobic.003G109832.1	283	K	-	PLN02290,p450 superfamily,p450,CypX	NA
Sobic.003G109832.1	284	S	-	PLN02290,p450 superfamily,p450,CypX	NA
Sobic.003G109832.1	285	T	-	PLN02290,p450 superfamily,p450,CypX	NA
Sobic.003G109832.1	286	N	-	PLN02290,p450 superfamily,p450,CypX	NA
Sobic.003G109832.1	287	V	-	PLN02290,p450 superfamily,p450,CypX	NA
Sobic.003G109832.1	288	E	-	PLN02290,p450 superfamily,p450,CypX	NA
Sobic.003G109832.1	289	L	-	PLN02290,p450 superfamily,p450,CypX	NA
Sobic.003G109832.1	290	F	-	PLN02290,p450 superfamily,p450,CypX	NA
Sobic.003G109832.1	291	D	-	PLN02290,p450 superfamily,p450,CypX	NA
Sobic.003G109832.1	292	R	-	PLN02290,p450 superfamily,p450,CypX	NA
Sobic.003G109832.1	293	F	-	PLN02290,p450 superfamily,p450,CypX	NA
Sobic.003G109832.1	295	Q	K	PLN02290,p450 superfamily,p450,CypX	NA
Sobic.003G109832.1	441	-	E	PLN02290,p450 superfamily,p450,CypX	NA
Sobic.003G109832.1	442	-	G	PLN02290,p450 superfamily,p450,CypX	NA
Sobic.003G109832.1	450	G	-	PLN02290,p450 superfamily,p450,CypX,P450_cycloAA_1	NA
Sobic.003G109832.1	451	G	-	PLN02290,p450 superfamily,p450,CypX,P450_cycloAA_1	NA
Sobic.003G109832.1	452	G	-	PLN02290,p450 superfamily,p450,CypX,P450_cycloAA_1	NA
Sobic.006G238500.1	8	-	T	Coatomer_E,Coatomer_E superfamily	NA
Sobic.006G238500.1	9	-	E	Coatomer_E,Coatomer_E superfamily	NA
Sobic.006G238500.1	10	-	G	Coatomer_E,Coatomer_E superfamily	NA
Sobic.006G238500.1	153	H	L	Coatomer_E,Coatomer_E superfamily,PEP_TPR_lipo,TPR_11 superfamily	NA
Sobic.002G204400.1	618	E	D	SMC_prok_B,SMC_N superfamily	NA
Sobic.002G204400.1	861	S	T	Smc,SMC_N superfamily,SMC_prok_B,CCDC158,PRK03918	NA
Sobic.002G204400.1	898	V	A	Smc,SMC_N superfamily,SMC_prok_B,CCDC158,PRK03918	NA
Sobic.002G079300.1	1	-	M	Methyltransf_2,AdoMet_MTases superfamily,C20_methyl_CrtF,C20_methyl_CrtF superfamily	NA
Sobic.002G079300.1	2	-	A	Methyltransf_2,AdoMet_MTases superfamily,C20_methyl_CrtF,C20_methyl_CrtF superfamily,AdoMet_MTases	NA
Sobic.002G079300.1	3	-	S	Methyltransf_2,AdoMet_MTases superfamily,C20_methyl_CrtF,C20_methyl_CrtF superfamily,AdoMet_MTases	NA
Sobic.002G079300.1	4	-	S	Methyltransf_2,AdoMet_MTases superfamily,C20_methyl_CrtF,C20_methyl_CrtF superfamily,AdoMet_MTases	S-adenosylmethionine binding site
Sobic.002G079300.1	5	-	S	Methyltransf_2,AdoMet_MTases superfamily,C20_methyl_CrtF,C20_methyl_CrtF superfamily,AdoMet_MTases	S-adenosylmethionine binding site
Sobic.002G079300.1	6	-	S	Methyltransf_2,AdoMet_MTases superfamily,C20_methyl_CrtF,C20_methyl_CrtF superfamily,AdoMet_MTases	S-adenosylmethionine binding site
Sobic.002G079300.1	7	-	D	Methyltransf_2,AdoMet_MTases superfamily,C20_methyl_CrtF,C20_methyl_CrtF superfamily,AdoMet_MTases	S-adenosylmethionine binding site
Sobic.002G079300.1	8	-	E	Methyltransf_2,AdoMet_MTases superfamily,C20_methyl_CrtF,C20_methyl_CrtF superfamily,AdoMet_MTases	S-adenosylmethionine binding site
Sobic.002G079300.1	9	-	L	Methyltransf_2,AdoMet_MTases superfamily,C20_methyl_CrtF,C20_methyl_CrtF superfamily,AdoMet_MTases	S-adenosylmethionine binding site
Sobic.002G079300.1	10	-	L	Methyltransf_2,AdoMet_MTases superfamily,C20_methyl_CrtF,C20_methyl_CrtF superfamily,AdoMet_MTases	S-adenosylmethionine binding site
Sobic.002G079300.1	11	-	Q	Methyltransf_2,AdoMet_MTases superfamily,C20_methyl_CrtF,C20_methyl_CrtF superfamily,AdoMet_MTases	NA
Sobic.002G079300.1	12	-	A	Methyltransf_2,AdoMet_MTases superfamily,C20_methyl_CrtF,C20_methyl_CrtF superfamily,AdoMet_MTases	NA
Sobic.002G079300.1	13	-	E	Methyltransf_2,AdoMet_MTases superfamily,C20_methyl_CrtF,C20_methyl_CrtF superfamily,AdoMet_MTases	NA
Sobic.002G079300.1	14	-	A	Methyltransf_2,AdoMet_MTases superfamily,C20_methyl_CrtF,C20_methyl_CrtF superfamily,AdoMet_MTases	NA
Sobic.002G079300.1	15	-	Q	Methyltransf_2,AdoMet_MTases superfamily,C20_methyl_CrtF,C20_methyl_CrtF superfamily,AdoMet_MTases	NA
Sobic.002G079300.1	16	-	L	Methyltransf_2,AdoMet_MTases superfamily,C20_methyl_CrtF,C20_methyl_CrtF superfamily,AdoMet_MTases	NA
Sobic.002G079300.1	17	-	W	Methyltransf_2,AdoMet_MTases superfamily,C20_methyl_CrtF,C20_methyl_CrtF superfamily,AdoMet_MTases	NA
Sobic.002G079300.1	18	-	C	Methyltransf_2,AdoMet_MTases superfamily,C20_methyl_CrtF,C20_methyl_CrtF superfamily,AdoMet_MTases	NA
Sobic.002G079300.1	19	-	H	Methyltransf_2,AdoMet_MTases superfamily,C20_methyl_CrtF,C20_methyl_CrtF superfamily,AdoMet_MTases	NA
Sobic.002G079300.1	20	-	T	Methyltransf_2,AdoMet_MTases superfamily,C20_methyl_CrtF,C20_methyl_CrtF superfamily,AdoMet_MTases	NA
Sobic.002G079300.1	21	-	F	Methyltransf_2,AdoMet_MTases superfamily,C20_methyl_CrtF,C20_methyl_CrtF superfamily,AdoMet_MTases	NA
Sobic.002G079300.1	22	-	G	Methyltransf_2,AdoMet_MTases superfamily,C20_methyl_CrtF,C20_methyl_CrtF superfamily,AdoMet_MTases	NA
Sobic.002G079300.1	23	-	Y	Methyltransf_2,AdoMet_MTases superfamily,C20_methyl_CrtF,C20_methyl_CrtF superfamily,AdoMet_MTases	NA
Sobic.002G079300.1	24	-	L	Methyltransf_2,AdoMet_MTases superfamily,C20_methyl_CrtF,C20_methyl_CrtF superfamily,AdoMet_MTases	NA
Sobic.002G079300.1	25	-	K	Methyltransf_2,AdoMet_MTases superfamily,C20_methyl_CrtF,C20_methyl_CrtF superfamily,AdoMet_MTases	NA
Sobic.002G079300.1	26	-	S	Methyltransf_2,AdoMet_MTases superfamily,C20_methyl_CrtF,C20_methyl_CrtF superfamily,AdoMet_MTases	NA
Sobic.002G079300.1	27	-	T	Methyltransf_2,AdoMet_MTases superfamily,C20_methyl_CrtF,C20_methyl_CrtF superfamily,AdoMet_MTases	NA
Sobic.002G079300.1	28	-	A	Methyltransf_2,AdoMet_MTases superfamily,C20_methyl_CrtF,C20_methyl_CrtF superfamily,AdoMet_MTases	S-adenosylmethionine binding site
Sobic.002G079300.1	29	-	L	Methyltransf_2,AdoMet_MTases superfamily,C20_methyl_CrtF,C20_methyl_CrtF superfamily,AdoMet_MTases	S-adenosylmethionine binding site
Sobic.002G079300.1	30	-	Q	Methyltransf_2,AdoMet_MTases superfamily,C20_methyl_CrtF,C20_methyl_CrtF superfamily,AdoMet_MTases	NA
Sobic.002G079300.1	31	-	C	Methyltransf_2,AdoMet_MTases superfamily,C20_methyl_CrtF,C20_methyl_CrtF superfamily,AdoMet_MTases	NA
Sobic.002G079300.1	32	-	A	Methyltransf_2,AdoMet_MTases superfamily,C20_methyl_CrtF,C20_methyl_CrtF superfamily,AdoMet_MTases	NA
Sobic.002G079300.1	33	-	I	Methyltransf_2,AdoMet_MTases superfamily,C20_methyl_CrtF,C20_methyl_CrtF superfamily,AdoMet_MTases	NA
Sobic.002G079300.1	34	-	K	Methyltransf_2,AdoMet_MTases superfamily,C20_methyl_CrtF,C20_methyl_CrtF superfamily,AdoMet_MTases	NA
Sobic.002G079300.1	35	-	F	Methyltransf_2,AdoMet_MTases superfamily,C20_methyl_CrtF,C20_methyl_CrtF superfamily,AdoMet_MTases	NA
Sobic.002G079300.1	36	-	G	Methyltransf_2,AdoMet_MTases superfamily,C20_methyl_CrtF,C20_methyl_CrtF superfamily,AdoMet_MTases	NA
Sobic.002G079300.1	37	-	I	Methyltransf_2,AdoMet_MTases superfamily,C20_methyl_CrtF,C20_methyl_CrtF superfamily,AdoMet_MTases	NA
Sobic.002G079300.1	38	-	P	Methyltransf_2,AdoMet_MTases superfamily,C20_methyl_CrtF,C20_methyl_CrtF superfamily,AdoMet_MTases	NA
Sobic.002G079300.1	39	-	N	Methyltransf_2,AdoMet_MTases superfamily,C20_methyl_CrtF,C20_methyl_CrtF superfamily,AdoMet_MTases	NA
Sobic.002G079300.1	40	-	A	Methyltransf_2,AdoMet_MTases superfamily,C20_methyl_CrtF,C20_methyl_CrtF superfamily,AdoMet_MTases	NA
Sobic.002G079300.1	41	-	I	Methyltransf_2,AdoMet_MTases superfamily,C20_methyl_CrtF,C20_methyl_CrtF superfamily,AdoMet_MTases	NA
Sobic.002G079300.1	42	-	D	Methyltransf_2,AdoMet_MTases superfamily,C20_methyl_CrtF,C20_methyl_CrtF superfamily,AdoMet_MTases	NA
Sobic.002G079300.1	43	-	R	Methyltransf_2,AdoMet_MTases superfamily,C20_methyl_CrtF,C20_methyl_CrtF superfamily,AdoMet_MTases	NA
Sobic.002G079300.1	44	-	C	Methyltransf_2,AdoMet_MTases superfamily,C20_methyl_CrtF,C20_methyl_CrtF superfamily,AdoMet_MTases	NA
Sobic.002G079300.1	45	-	G	Methyltransf_2,AdoMet_MTases superfamily,C20_methyl_CrtF,C20_methyl_CrtF superfamily,AdoMet_MTases	NA
Sobic.002G079300.1	46	-	G	Methyltransf_2,AdoMet_MTases superfamily,C20_methyl_CrtF,C20_methyl_CrtF superfamily,AdoMet_MTases	NA
Sobic.002G079300.1	47	-	A	Methyltransf_2,AdoMet_MTases superfamily,C20_methyl_CrtF,C20_methyl_CrtF superfamily,AdoMet_MTases	S-adenosylmethionine binding site
Sobic.002G079300.1	48	-	S	Methyltransf_2,AdoMet_MTases superfamily,C20_methyl_CrtF,C20_methyl_CrtF superfamily,AdoMet_MTases	S-adenosylmethionine binding site
Sobic.002G079300.1	49	-	S	Methyltransf_2,AdoMet_MTases superfamily,C20_methyl_CrtF,C20_methyl_CrtF superfamily,AdoMet_MTases	S-adenosylmethionine binding site
Sobic.002G079300.1	50	-	L	Methyltransf_2,AdoMet_MTases superfamily,C20_methyl_CrtF,C20_methyl_CrtF superfamily,AdoMet_MTases	NA
Sobic.002G079300.1	51	-	S	Methyltransf_2,AdoMet_MTases superfamily,C20_methyl_CrtF,C20_methyl_CrtF superfamily,AdoMet_MTases	NA
Sobic.002G079300.1	52	-	E	Methyltransf_2,AdoMet_MTases superfamily,C20_methyl_CrtF,C20_methyl_CrtF superfamily,AdoMet_MTases	NA
Sobic.002G079300.1	53	-	L	Methyltransf_2,AdoMet_MTases superfamily,C20_methyl_CrtF,C20_methyl_CrtF superfamily,AdoMet_MTases	NA
Sobic.002G079300.1	54	-	H	Methyltransf_2,AdoMet_MTases superfamily,C20_methyl_CrtF,C20_methyl_CrtF superfamily,AdoMet_MTases	NA
Sobic.002G079300.1	55	-	A	Methyltransf_2,AdoMet_MTases superfamily,C20_methyl_CrtF,C20_methyl_CrtF superfamily,AdoMet_MTases	NA
Sobic.002G079300.1	56	-	A	Methyltransf_2,AdoMet_MTases superfamily,C20_methyl_CrtF,C20_methyl_CrtF superfamily,AdoMet_MTases	NA
Sobic.002G079300.1	57	-	L	Methyltransf_2,AdoMet_MTases superfamily,C20_methyl_CrtF,C20_methyl_CrtF superfamily,AdoMet_MTases	NA
Sobic.002G079300.1	58	-	P	Methyltransf_2,AdoMet_MTases superfamily,C20_methyl_CrtF,C20_methyl_CrtF superfamily,AdoMet_MTases	NA
Sobic.002G079300.1	59	-	V	Methyltransf_2,AdoMet_MTases superfamily,C20_methyl_CrtF,C20_methyl_CrtF superfamily,AdoMet_MTases	NA
Sobic.002G079300.1	60	-	T	Methyltransf_2,AdoMet_MTases superfamily,C20_methyl_CrtF,C20_methyl_CrtF superfamily,AdoMet_MTases	NA
Sobic.002G079300.1	61	-	A	Methyltransf_2,AdoMet_MTases superfamily,C20_methyl_CrtF,C20_methyl_CrtF superfamily,AdoMet_MTases	NA
Sobic.002G079300.1	62	-	S	Methyltransf_2,AdoMet_MTases superfamily,C20_methyl_CrtF,C20_methyl_CrtF superfamily,AdoMet_MTases	S-adenosylmethionine binding site
Sobic.002G079300.1	63	-	K	Methyltransf_2,AdoMet_MTases superfamily,C20_methyl_CrtF,C20_methyl_CrtF superfamily,AdoMet_MTases	NA
Sobic.002G079300.1	64	-	R	Methyltransf_2,AdoMet_MTases superfamily,C20_methyl_CrtF,C20_methyl_CrtF superfamily,AdoMet_MTases	NA
Sobic.002G079300.1	65	-	A	Methyltransf_2,AdoMet_MTases superfamily,C20_methyl_CrtF,C20_methyl_CrtF superfamily,AdoMet_MTases	NA
Sobic.002G079300.1	66	-	C	Methyltransf_2,AdoMet_MTases superfamily,C20_methyl_CrtF,C20_methyl_CrtF superfamily,AdoMet_MTases	NA
Sobic.002G079300.1	67	-	L	Methyltransf_2,AdoMet_MTases superfamily,C20_methyl_CrtF,C20_methyl_CrtF superfamily,AdoMet_MTases	NA
Sobic.002G079300.1	68	-	S	Methyltransf_2,AdoMet_MTases superfamily,C20_methyl_CrtF,C20_methyl_CrtF superfamily,AdoMet_MTases	NA
Sobic.002G079300.1	69	-	R	Methyltransf_2,AdoMet_MTases superfamily,C20_methyl_CrtF,C20_methyl_CrtF superfamily,AdoMet_MTases	NA
Sobic.002G079300.1	70	-	L	Methyltransf_2,AdoMet_MTases superfamily,C20_methyl_CrtF,C20_methyl_CrtF superfamily,AdoMet_MTases	NA
Sobic.002G079300.1	71	-	M	Methyltransf_2,AdoMet_MTases superfamily,C20_methyl_CrtF,C20_methyl_CrtF superfamily,AdoMet_MTases	NA
Sobic.002G079300.1	72	-	R	Methyltransf_2,AdoMet_MTases superfamily,C20_methyl_CrtF,C20_methyl_CrtF superfamily,AdoMet_MTases	NA
Sobic.002G079300.1	73	-	F	Methyltransf_2,AdoMet_MTases superfamily,C20_methyl_CrtF,C20_methyl_CrtF superfamily,AdoMet_MTases	NA
Sobic.002G079300.1	74	-	L	Methyltransf_2,AdoMet_MTases superfamily,C20_methyl_CrtF,C20_methyl_CrtF superfamily,AdoMet_MTases	NA
Sobic.002G079300.1	75	-	A	Methyltransf_2,AdoMet_MTases superfamily,C20_methyl_CrtF,C20_methyl_CrtF superfamily,AdoMet_MTases	NA
Sobic.002G079300.1	76	-	A	Methyltransf_2,AdoMet_MTases superfamily,C20_methyl_CrtF,C20_methyl_CrtF superfamily,AdoMet_MTases	NA
Sobic.002G079300.1	77	-	S	Methyltransf_2,AdoMet_MTases superfamily,C20_methyl_CrtF,C20_methyl_CrtF superfamily,AdoMet_MTases	NA
Sobic.002G079300.1	78	-	G	Methyltransf_2,AdoMet_MTases superfamily,C20_methyl_CrtF,C20_methyl_CrtF superfamily,AdoMet_MTases	NA
Sobic.002G079300.1	79	-	I	Methyltransf_2,AdoMet_MTases superfamily,C20_methyl_CrtF,C20_methyl_CrtF superfamily,AdoMet_MTases	NA
Sobic.002G079300.1	80	-	F	Methyltransf_2,AdoMet_MTases superfamily,C20_methyl_CrtF,C20_methyl_CrtF superfamily,AdoMet_MTases	NA
Sobic.002G079300.1	81	-	R	Methyltransf_2,AdoMet_MTases superfamily,C20_methyl_CrtF,C20_methyl_CrtF superfamily,AdoMet_MTases	NA
Sobic.002G079300.1	82	-	E	Methyltransf_2,AdoMet_MTases superfamily,C20_methyl_CrtF,C20_methyl_CrtF superfamily,AdoMet_MTases	NA
Sobic.002G079300.1	83	-	Q	Methyltransf_2,AdoMet_MTases superfamily,C20_methyl_CrtF,C20_methyl_CrtF superfamily,AdoMet_MTases	NA
Sobic.002G079300.1	84	-	A	Methyltransf_2,AdoMet_MTases superfamily,C20_methyl_CrtF,C20_methyl_CrtF superfamily,AdoMet_MTases	NA
Sobic.002G079300.1	85	-	A	Methyltransf_2,AdoMet_MTases superfamily,C20_methyl_CrtF,C20_methyl_CrtF superfamily,AdoMet_MTases	NA
Sobic.002G079300.1	86	-	A	Methyltransf_2,AdoMet_MTases superfamily,C20_methyl_CrtF,C20_methyl_CrtF superfamily,AdoMet_MTases	NA
Sobic.002G079300.1	87	-	G	Methyltransf_2,AdoMet_MTases superfamily,C20_methyl_CrtF,C20_methyl_CrtF superfamily,AdoMet_MTases	NA
Sobic.002G079300.1	88	-	K	Methyltransf_2,AdoMet_MTases superfamily,C20_methyl_CrtF,C20_methyl_CrtF superfamily,AdoMet_MTases	NA
Sobic.002G079300.1	89	-	E	Methyltransf_2,AdoMet_MTases superfamily,C20_methyl_CrtF,C20_methyl_CrtF superfamily,AdoMet_MTases	NA
Sobic.002G079300.1	90	-	A	Methyltransf_2,AdoMet_MTases superfamily,C20_methyl_CrtF,C20_methyl_CrtF superfamily,AdoMet_MTases	NA
Sobic.002G079300.1	91	-	A	Methyltransf_2,AdoMet_MTases superfamily,C20_methyl_CrtF,C20_methyl_CrtF superfamily,AdoMet_MTases	NA
Sobic.002G079300.1	92	-	A	Methyltransf_2,AdoMet_MTases superfamily,C20_methyl_CrtF,C20_methyl_CrtF superfamily,AdoMet_MTases	NA
Sobic.002G079300.1	93	-	A	Methyltransf_2,AdoMet_MTases superfamily,C20_methyl_CrtF,C20_methyl_CrtF superfamily,AdoMet_MTases	NA
Sobic.002G079300.1	94	-	G	Methyltransf_2,AdoMet_MTases superfamily,C20_methyl_CrtF,C20_methyl_CrtF superfamily,AdoMet_MTases	NA
Sobic.002G079300.1	95	-	A	Methyltransf_2,AdoMet_MTases superfamily,C20_methyl_CrtF,C20_methyl_CrtF superfamily,AdoMet_MTases	NA
Sobic.002G079300.1	96	-	G	Methyltransf_2,AdoMet_MTases superfamily,C20_methyl_CrtF,C20_methyl_CrtF superfamily,AdoMet_MTases	NA
Sobic.002G079300.1	97	-	S	Methyltransf_2,AdoMet_MTases superfamily,C20_methyl_CrtF,C20_methyl_CrtF superfamily,AdoMet_MTases	NA
Sobic.002G079300.1	98	-	C	Methyltransf_2,AdoMet_MTases superfamily,C20_methyl_CrtF,C20_methyl_CrtF superfamily,AdoMet_MTases	NA
Sobic.002G079300.1	99	-	Y	Methyltransf_2,AdoMet_MTases superfamily,C20_methyl_CrtF,C20_methyl_CrtF superfamily,AdoMet_MTases	NA
Sobic.002G079300.1	100	-	S	Methyltransf_2,AdoMet_MTases superfamily,C20_methyl_CrtF,C20_methyl_CrtF superfamily	NA
Sobic.002G079300.1	101	-	L	Methyltransf_2,AdoMet_MTases superfamily,C20_methyl_CrtF,C20_methyl_CrtF superfamily	NA
Sobic.002G079300.1	102	-	T	Methyltransf_2,AdoMet_MTases superfamily,C20_methyl_CrtF,C20_methyl_CrtF superfamily	NA
Sobic.002G079300.1	103	-	P	Methyltransf_2,AdoMet_MTases superfamily,C20_methyl_CrtF,C20_methyl_CrtF superfamily	NA
Sobic.002G079300.1	104	-	V	Methyltransf_2,AdoMet_MTases superfamily,C20_methyl_CrtF,C20_methyl_CrtF superfamily	NA
Sobic.002G079300.1	105	-	S	Methyltransf_2,AdoMet_MTases superfamily,C20_methyl_CrtF,C20_methyl_CrtF superfamily	NA
Sobic.002G079300.1	106	-	R	Methyltransf_2,AdoMet_MTases superfamily,C20_methyl_CrtF,C20_methyl_CrtF superfamily	NA
Sobic.002G079300.1	107	-	L	Methyltransf_2,AdoMet_MTases superfamily,C20_methyl_CrtF,C20_methyl_CrtF superfamily	NA
Sobic.002G079300.1	108	-	L	Methyltransf_2,AdoMet_MTases superfamily,C20_methyl_CrtF,C20_methyl_CrtF superfamily	NA
Sobic.002G079300.1	109	-	V	Methyltransf_2,AdoMet_MTases superfamily,C20_methyl_CrtF,C20_methyl_CrtF superfamily	NA
Sobic.002G079300.1	110	-	I	Methyltransf_2,AdoMet_MTases superfamily,C20_methyl_CrtF,C20_methyl_CrtF superfamily	NA
Sobic.002G079300.1	111	-	P	Methyltransf_2,AdoMet_MTases superfamily,C20_methyl_CrtF,C20_methyl_CrtF superfamily	NA
Sobic.002G079300.1	112	-	D	Methyltransf_2,AdoMet_MTases superfamily,C20_methyl_CrtF,C20_methyl_CrtF superfamily	NA
Sobic.002G079300.1	113	-	G	Methyltransf_2,AdoMet_MTases superfamily,C20_methyl_CrtF,C20_methyl_CrtF superfamily	NA
Sobic.002G079300.1	114	-	G	Methyltransf_2,AdoMet_MTases superfamily,C20_methyl_CrtF,C20_methyl_CrtF superfamily	NA
Sobic.002G079300.1	115	-	N	Methyltransf_2,AdoMet_MTases superfamily,C20_methyl_CrtF,C20_methyl_CrtF superfamily	NA
Sobic.002G079300.1	116	-	D	Methyltransf_2,AdoMet_MTases superfamily,C20_methyl_CrtF,C20_methyl_CrtF superfamily	NA
Sobic.002G079300.1	117	-	D	Methyltransf_2,AdoMet_MTases superfamily,C20_methyl_CrtF,C20_methyl_CrtF superfamily	NA
Sobic.002G079300.1	118	-	D	Methyltransf_2,AdoMet_MTases superfamily,C20_methyl_CrtF,C20_methyl_CrtF superfamily	NA
Sobic.002G079300.1	119	-	R	Methyltransf_2,AdoMet_MTases superfamily,C20_methyl_CrtF,C20_methyl_CrtF superfamily	NA
Sobic.002G079300.1	120	-	N	Methyltransf_2,AdoMet_MTases superfamily,C20_methyl_CrtF,C20_methyl_CrtF superfamily	NA
Sobic.002G079300.1	121	-	G	Methyltransf_2,AdoMet_MTases superfamily,C20_methyl_CrtF,C20_methyl_CrtF superfamily	NA
Sobic.002G079300.1	122	-	H	Methyltransf_2,AdoMet_MTases superfamily,C20_methyl_CrtF,C20_methyl_CrtF superfamily	NA
Sobic.002G079300.1	123	-	T	Methyltransf_2,AdoMet_MTases superfamily,C20_methyl_CrtF,C20_methyl_CrtF superfamily	NA
Sobic.002G079300.1	124	-	C	Methyltransf_2,AdoMet_MTases superfamily,C20_methyl_CrtF,C20_methyl_CrtF superfamily	NA
Sobic.002G079300.1	125	-	L	Methyltransf_2,AdoMet_MTases superfamily,C20_methyl_CrtF,C20_methyl_CrtF superfamily	NA
Sobic.002G079300.1	126	-	S	Methyltransf_2,AdoMet_MTases superfamily,C20_methyl_CrtF,C20_methyl_CrtF superfamily	NA
Sobic.002G079300.1	127	-	Q	Methyltransf_2,AdoMet_MTases superfamily,C20_methyl_CrtF,C20_methyl_CrtF superfamily	NA
Sobic.002G079300.1	128	-	L	Methyltransf_2,AdoMet_MTases superfamily,C20_methyl_CrtF,C20_methyl_CrtF superfamily	NA
Sobic.002G079300.1	129	-	I	Methyltransf_2,AdoMet_MTases superfamily,C20_methyl_CrtF,C20_methyl_CrtF superfamily	NA
Sobic.002G079300.1	130	-	L	Methyltransf_2,AdoMet_MTases superfamily,C20_methyl_CrtF,C20_methyl_CrtF superfamily	NA
Sobic.002G079300.1	131	-	F	Methyltransf_2,AdoMet_MTases superfamily,C20_methyl_CrtF,C20_methyl_CrtF superfamily	NA
Sobic.002G079300.1	132	-	T	Methyltransf_2,AdoMet_MTases superfamily,C20_methyl_CrtF,C20_methyl_CrtF superfamily	NA
Sobic.002G079300.1	133	-	N	Methyltransf_2,AdoMet_MTases superfamily,C20_methyl_CrtF,C20_methyl_CrtF superfamily	NA
Sobic.002G079300.1	134	-	S	Methyltransf_2,AdoMet_MTases superfamily,C20_methyl_CrtF,C20_methyl_CrtF superfamily	NA
Sobic.002G079300.1	135	-	P	Methyltransf_2,AdoMet_MTases superfamily,C20_methyl_CrtF,C20_methyl_CrtF superfamily	NA
Sobic.002G079300.1	136	-	F	Methyltransf_2,AdoMet_MTases superfamily,C20_methyl_CrtF,C20_methyl_CrtF superfamily	NA
Sobic.002G079300.1	137	-	H	Methyltransf_2,AdoMet_MTases superfamily,C20_methyl_CrtF,C20_methyl_CrtF superfamily	NA
Sobic.002G079300.1	138	-	L	Methyltransf_2,AdoMet_MTases superfamily,C20_methyl_CrtF,C20_methyl_CrtF superfamily	NA
Sobic.002G079300.1	139	-	K	Methyltransf_2,AdoMet_MTases superfamily,C20_methyl_CrtF,C20_methyl_CrtF superfamily	NA
Sobic.002G079300.1	140	-	S	Methyltransf_2,AdoMet_MTases superfamily,C20_methyl_CrtF,C20_methyl_CrtF superfamily	NA
Sobic.002G079300.1	141	-	S	Methyltransf_2,AdoMet_MTases superfamily,C20_methyl_CrtF,C20_methyl_CrtF superfamily	NA
Sobic.002G079300.1	142	-	Q	Methyltransf_2,AdoMet_MTases superfamily	NA
Sobic.002G079300.1	143	-	C	Methyltransf_2,AdoMet_MTases superfamily	NA
Sobic.002G079300.1	144	-	L	Methyltransf_2,AdoMet_MTases superfamily	NA
Sobic.002G079300.1	145	-	A	Methyltransf_2,AdoMet_MTases superfamily	NA
Sobic.003G061300.1	341	V	G	PLN02573,IlvB superfamily,PDC1,indolpyr_decarb	NA
Sobic.005G182200.2	1	-	M	PLN03210,LRR_3 superfamily	NA
Sobic.005G182200.2	2	-	E	NB-ARC,NB-ARC superfamily,PLN03210,LRR_3 superfamily	NA
Sobic.005G182200.2	3	-	L	NB-ARC,NB-ARC superfamily,PLN03210,LRR_3 superfamily	NA
Sobic.005G182200.2	4	-	A	NB-ARC,NB-ARC superfamily,PLN03210,LRR_3 superfamily	NA
Sobic.005G182200.2	5	-	V	NB-ARC,NB-ARC superfamily,PLN03210,LRR_3 superfamily	NA
Sobic.005G182200.2	6	-	G	NB-ARC,NB-ARC superfamily,PLN03210,LRR_3 superfamily	NA
Sobic.005G182200.2	7	-	A	NB-ARC,NB-ARC superfamily,PLN03210,LRR_3 superfamily	NA
Sobic.005G182200.2	8	-	S	NB-ARC,NB-ARC superfamily,PLN03210,LRR_3 superfamily	NA
Sobic.005G182200.2	9	-	D	NB-ARC,NB-ARC superfamily,PLN03210,LRR_3 superfamily	NA
Sobic.005G182200.2	10	-	S	NB-ARC,NB-ARC superfamily,PLN03210,LRR_3 superfamily	NA
Sobic.005G182200.2	11	-	A	NB-ARC,NB-ARC superfamily,PLN03210,LRR_3 superfamily	NA
Sobic.005G182200.2	12	-	M	NB-ARC,NB-ARC superfamily,PLN03210,LRR_3 superfamily	NA
Sobic.005G182200.2	13	-	K	NB-ARC,NB-ARC superfamily,PLN03210,LRR_3 superfamily	NA
Sobic.005G182200.2	14	-	S	NB-ARC,NB-ARC superfamily,PLN03210,LRR_3 superfamily	NA
Sobic.005G182200.2	15	-	L	NB-ARC,NB-ARC superfamily,PLN03210,LRR_3 superfamily	NA
Sobic.005G182200.2	16	-	L	NB-ARC,NB-ARC superfamily,PLN03210,LRR_3 superfamily	NA
Sobic.005G182200.2	17	-	G	NB-ARC,NB-ARC superfamily,PLN03210,LRR_3 superfamily	NA
Sobic.005G182200.2	18	-	K	NB-ARC,NB-ARC superfamily,PLN03210,LRR_3 superfamily	NA
Sobic.005G182200.2	19	-	L	NB-ARC,NB-ARC superfamily,PLN03210,LRR_3 superfamily	NA
Sobic.005G182200.2	20	-	G	NB-ARC,NB-ARC superfamily,PLN03210,LRR_3 superfamily	NA
Sobic.005G182200.2	21	-	S	NB-ARC,NB-ARC superfamily,PLN03210,LRR_3 superfamily	NA
Sobic.005G182200.2	22	-	L	NB-ARC,NB-ARC superfamily,PLN03210,LRR_3 superfamily	NA
Sobic.005G182200.2	23	-	L	NB-ARC,NB-ARC superfamily,PLN03210,LRR_3 superfamily	NA
Sobic.005G182200.2	24	-	A	NB-ARC,NB-ARC superfamily,PLN03210,LRR_3 superfamily	NA
Sobic.005G182200.2	25	-	Q	NB-ARC,NB-ARC superfamily,PLN03210,LRR_3 superfamily	NA
Sobic.005G182200.2	26	-	E	NB-ARC,NB-ARC superfamily,PLN03210,LRR_3 superfamily	NA
Sobic.005G182200.2	27	-	Y	NB-ARC,NB-ARC superfamily,PLN03210,LRR_3 superfamily	NA
Sobic.005G182200.2	28	-	T	NB-ARC,NB-ARC superfamily,PLN03210,LRR_3 superfamily	NA
Sobic.005G182200.2	29	-	L	NB-ARC,NB-ARC superfamily,PLN03210,LRR_3 superfamily	NA
Sobic.005G182200.2	30	-	I	NB-ARC,NB-ARC superfamily,PLN03210,LRR_3 superfamily	NA
Sobic.005G182200.2	31	-	S	NB-ARC,NB-ARC superfamily,PLN03210,LRR_3 superfamily	NA
Sobic.005G182200.2	32	-	G	NB-ARC,NB-ARC superfamily,PLN03210,LRR_3 superfamily	NA
Sobic.005G182200.2	33	-	V	NB-ARC,NB-ARC superfamily,PLN03210,LRR_3 superfamily	NA
Sobic.005G182200.2	34	-	R	NB-ARC,NB-ARC superfamily,PLN03210,LRR_3 superfamily	NA
Sobic.005G182200.2	35	-	S	NB-ARC,NB-ARC superfamily,PLN03210,LRR_3 superfamily	NA
Sobic.005G182200.2	36	-	E	NB-ARC,NB-ARC superfamily,PLN03210,LRR_3 superfamily	NA
Sobic.005G182200.2	37	-	I	NB-ARC,NB-ARC superfamily,PLN03210,LRR_3 superfamily	NA
Sobic.005G182200.2	38	-	Q	NB-ARC,NB-ARC superfamily,PLN03210,LRR_3 superfamily	NA
Sobic.005G182200.2	39	-	Y	NB-ARC,NB-ARC superfamily,PLN03210,LRR_3 superfamily	NA
Sobic.005G182200.2	40	-	I	NB-ARC,NB-ARC superfamily,PLN03210,LRR_3 superfamily	NA
Sobic.005G182200.2	41	-	K	NB-ARC,NB-ARC superfamily,PLN03210,LRR_3 superfamily	NA
Sobic.005G182200.2	42	-	D	NB-ARC,NB-ARC superfamily,PLN03210,LRR_3 superfamily	NA
Sobic.005G182200.2	43	-	E	NB-ARC,NB-ARC superfamily,PLN03210,LRR_3 superfamily	NA
Sobic.005G182200.2	44	-	L	NB-ARC,NB-ARC superfamily,PLN03210,LRR_3 superfamily	NA
Sobic.005G182200.2	45	-	A	NB-ARC,NB-ARC superfamily,PLN03210,LRR_3 superfamily	NA
Sobic.005G182200.2	46	-	S	NB-ARC,NB-ARC superfamily,PLN03210,LRR_3 superfamily	NA
Sobic.005G182200.2	47	-	M	NB-ARC,NB-ARC superfamily,PLN03210,LRR_3 superfamily	NA
Sobic.005G182200.2	48	-	H	NB-ARC,NB-ARC superfamily,PLN03210,LRR_3 superfamily	NA
Sobic.005G182200.2	49	-	A	NB-ARC,NB-ARC superfamily,PLN03210,LRR_3 superfamily	NA
Sobic.005G182200.2	50	-	F	NB-ARC,NB-ARC superfamily,PLN03210,LRR_3 superfamily	NA
Sobic.005G182200.2	51	-	L	NB-ARC,NB-ARC superfamily,PLN03210,LRR_3 superfamily	NA
Sobic.005G182200.2	52	-	R	NB-ARC,NB-ARC superfamily,PLN03210,LRR_3 superfamily	NA
Sobic.005G182200.2	53	-	N	NB-ARC,NB-ARC superfamily,PLN03210,LRR_3 superfamily	NA
Sobic.005G182200.2	54	-	L	NB-ARC,NB-ARC superfamily,PLN03210,LRR_3 superfamily	NA
Sobic.005G182200.2	55	-	G	NB-ARC,NB-ARC superfamily,PLN03210,LRR_3 superfamily	NA
Sobic.005G182200.2	56	-	H	NB-ARC,NB-ARC superfamily,PLN03210,LRR_3 superfamily	NA
Sobic.005G182200.2	57	-	A	NB-ARC,NB-ARC superfamily,PLN03210,LRR_3 superfamily	NA
Sobic.005G182200.2	58	-	A	NB-ARC,NB-ARC superfamily,PLN03210,LRR_3 superfamily	NA
Sobic.005G182200.2	59	-	G	NB-ARC,NB-ARC superfamily,PLN03210,LRR_3 superfamily	NA
Sobic.005G182200.2	60	-	E	NB-ARC,NB-ARC superfamily,PLN03210,LRR_3 superfamily	NA
Sobic.005G182200.2	61	-	H	NB-ARC,NB-ARC superfamily,PLN03210,LRR_3 superfamily	NA
Sobic.005G182200.2	62	-	H	NB-ARC,NB-ARC superfamily,PLN03210,LRR_3 superfamily	NA
Sobic.005G182200.2	63	-	D	NB-ARC,NB-ARC superfamily,PLN03210,LRR_3 superfamily	NA
Sobic.005G182200.2	64	-	E	NB-ARC,NB-ARC superfamily,PLN03210,LRR_3 superfamily	NA
Sobic.005G182200.2	65	-	Q	NB-ARC,NB-ARC superfamily,PLN03210,LRR_3 superfamily	NA
Sobic.005G182200.2	66	-	T	NB-ARC,NB-ARC superfamily,PLN03210,LRR_3 superfamily	NA
Sobic.005G182200.2	67	-	K	NB-ARC,NB-ARC superfamily,PLN03210,LRR_3 superfamily	NA
Sobic.005G182200.2	68	-	D	NB-ARC,NB-ARC superfamily,PLN03210,LRR_3 superfamily	NA
Sobic.005G182200.2	69	-	W	NB-ARC,NB-ARC superfamily,PLN03210,LRR_3 superfamily	NA
Sobic.005G182200.2	70	-	M	NB-ARC,NB-ARC superfamily,PLN03210,LRR_3 superfamily	NA
Sobic.005G182200.2	71	-	E	NB-ARC,NB-ARC superfamily,PLN03210,LRR_3 superfamily	NA
Sobic.005G182200.2	72	-	Q	NB-ARC,NB-ARC superfamily,PLN03210,LRR_3 superfamily	NA
Sobic.005G182200.2	73	-	V	NB-ARC,NB-ARC superfamily,PLN03210,LRR_3 superfamily	NA
Sobic.005G182200.2	74	-	R	NB-ARC,NB-ARC superfamily,PLN03210,LRR_3 superfamily	NA
Sobic.005G182200.2	75	-	D	NB-ARC,NB-ARC superfamily,PLN03210,LRR_3 superfamily	NA
Sobic.005G182200.2	76	-	V	NB-ARC,NB-ARC superfamily,PLN03210,LRR_3 superfamily	NA
Sobic.005G182200.2	77	-	A	NB-ARC,NB-ARC superfamily,PLN03210,LRR_3 superfamily	NA
Sobic.005G182200.2	78	-	Y	NB-ARC,NB-ARC superfamily,PLN03210,LRR_3 superfamily	NA
Sobic.005G182200.2	79	-	D	NB-ARC,NB-ARC superfamily,PLN03210,LRR_3 superfamily	NA
Sobic.005G182200.2	80	-	I	NB-ARC,NB-ARC superfamily,PLN03210,LRR_3 superfamily	NA
Sobic.005G182200.2	81	-	E	NB-ARC,NB-ARC superfamily,PLN03210,LRR_3 superfamily	NA
Sobic.005G182200.2	82	-	N	NB-ARC,NB-ARC superfamily,PLN03210,LRR_3 superfamily	NA
Sobic.005G182200.2	83	-	C	NB-ARC,NB-ARC superfamily,PLN03210,LRR_3 superfamily	NA
Sobic.005G182200.2	84	-	I	NB-ARC,NB-ARC superfamily,PLN03210,LRR_3 superfamily	NA
Sobic.005G182200.2	85	-	D	NB-ARC,NB-ARC superfamily,PLN03210,LRR_3 superfamily	NA
Sobic.005G182200.2	86	-	D	NB-ARC,NB-ARC superfamily,PLN03210,LRR_3 superfamily	NA
Sobic.005G182200.2	87	-	F	NB-ARC,NB-ARC superfamily,PLN03210,LRR_3 superfamily	NA
Sobic.005G182200.2	88	-	A	NB-ARC,NB-ARC superfamily,PLN03210,LRR_3 superfamily	NA
Sobic.005G182200.2	89	-	H	NB-ARC,NB-ARC superfamily,PLN03210,LRR_3 superfamily	NA
Sobic.005G182200.2	90	-	R	NB-ARC,NB-ARC superfamily,PLN03210,LRR_3 superfamily	NA
Sobic.005G182200.2	91	-	L	NB-ARC,NB-ARC superfamily,PLN03210,LRR_3 superfamily	NA
Sobic.005G182200.2	92	-	G	NB-ARC,NB-ARC superfamily,PLN03210,LRR_3 superfamily	NA
Sobic.005G182200.2	93	-	A	NB-ARC,NB-ARC superfamily,PLN03210,LRR_3 superfamily	NA
Sobic.005G182200.2	94	-	Q	NB-ARC,NB-ARC superfamily,PLN03210,LRR_3 superfamily	NA
Sobic.005G182200.2	95	-	P	NB-ARC,NB-ARC superfamily,PLN03210,LRR_3 superfamily	NA
Sobic.005G182200.2	96	-	R	NB-ARC,NB-ARC superfamily,PLN03210,LRR_3 superfamily	NA
Sobic.005G182200.2	97	-	G	NB-ARC,NB-ARC superfamily,PLN03210,LRR_3 superfamily	NA
Sobic.005G182200.2	98	-	E	NB-ARC,NB-ARC superfamily,PLN03210,LRR_3 superfamily	NA
Sobic.005G182200.2	99	-	G	NB-ARC,NB-ARC superfamily,PLN03210,LRR_3 superfamily	NA
Sobic.005G182200.2	100	-	L	NB-ARC,NB-ARC superfamily,PLN03210,LRR_3 superfamily	NA
Sobic.005G182200.2	101	-	L	NB-ARC,NB-ARC superfamily,PLN03210,LRR_3 superfamily	NA
Sobic.005G182200.2	102	-	P	NB-ARC,NB-ARC superfamily,PLN03210,LRR_3 superfamily	NA
Sobic.005G182200.2	103	-	D	NB-ARC,NB-ARC superfamily,PLN03210,LRR_3 superfamily	NA
Sobic.005G182200.2	104	-	L	NB-ARC,NB-ARC superfamily,PLN03210,LRR_3 superfamily	NA
Sobic.005G182200.2	105	-	R	NB-ARC,NB-ARC superfamily,PLN03210,LRR_3 superfamily	NA
Sobic.005G182200.2	106	-	R	NB-ARC,NB-ARC superfamily,PLN03210,LRR_3 superfamily	NA
Sobic.005G182200.2	107	-	A	NB-ARC,NB-ARC superfamily,PLN03210,LRR_3 superfamily	NA
Sobic.005G182200.2	108	-	W	NB-ARC,NB-ARC superfamily,PLN03210,LRR_3 superfamily	NA
Sobic.005G182200.2	109	-	Y	NB-ARC,NB-ARC superfamily,PLN03210,LRR_3 superfamily	NA
Sobic.005G182200.2	110	-	A	NB-ARC,NB-ARC superfamily,PLN03210,LRR_3 superfamily	NA
Sobic.005G182200.2	111	-	M	NB-ARC,NB-ARC superfamily,PLN03210,LRR_3 superfamily	NA
Sobic.005G182200.2	112	-	A	NB-ARC,NB-ARC superfamily,PLN03210,LRR_3 superfamily	NA
Sobic.005G182200.2	113	-	T	NB-ARC,NB-ARC superfamily,PLN03210,LRR_3 superfamily	NA
Sobic.005G182200.2	114	-	L	NB-ARC,NB-ARC superfamily,PLN03210,LRR_3 superfamily	NA
Sobic.005G182200.2	115	-	W	NB-ARC,NB-ARC superfamily,PLN03210,LRR_3 superfamily	NA
Sobic.005G182200.2	116	-	A	NB-ARC,NB-ARC superfamily,PLN03210,LRR_3 superfamily	NA
Sobic.005G182200.2	117	-	R	NB-ARC,NB-ARC superfamily,PLN03210,LRR_3 superfamily	NA
Sobic.005G182200.2	118	-	R	NB-ARC,NB-ARC superfamily,PLN03210,LRR_3 superfamily	NA
Sobic.005G182200.2	119	-	G	NB-ARC,NB-ARC superfamily,PLN03210,LRR_3 superfamily	NA
Sobic.005G182200.2	120	-	I	NB-ARC,NB-ARC superfamily,PLN03210,LRR_3 superfamily	NA
Sobic.005G182200.2	121	-	A	NB-ARC,NB-ARC superfamily,PLN03210,LRR_3 superfamily	NA
Sobic.005G182200.2	122	-	A	NB-ARC,NB-ARC superfamily,PLN03210,LRR_3 superfamily	NA
Sobic.005G182200.2	123	-	Q	NB-ARC,NB-ARC superfamily,PLN03210,LRR_3 superfamily	NA
Sobic.005G182200.2	124	-	I	NB-ARC,NB-ARC superfamily,PLN03210,LRR_3 superfamily	NA
Sobic.005G182200.2	125	-	V	NB-ARC,NB-ARC superfamily,PLN03210,LRR_3 superfamily	NA
Sobic.005G182200.2	126	-	D	NB-ARC,NB-ARC superfamily,PLN03210,LRR_3 superfamily	NA
Sobic.005G182200.2	127	-	L	NB-ARC,NB-ARC superfamily,PLN03210,LRR_3 superfamily	NA
Sobic.005G182200.2	128	-	R	NB-ARC,NB-ARC superfamily,PLN03210,LRR_3 superfamily	NA
Sobic.005G182200.2	129	-	N	NB-ARC,NB-ARC superfamily,PLN03210,LRR_3 superfamily	NA
Sobic.005G182200.2	130	-	R	NB-ARC,NB-ARC superfamily,PLN03210,LRR_3 superfamily	NA
Sobic.005G182200.2	131	-	A	NB-ARC,NB-ARC superfamily,PLN03210,LRR_3 superfamily	NA
Sobic.005G182200.2	132	-	Q	NB-ARC,NB-ARC superfamily,PLN03210,LRR_3 superfamily	NA
Sobic.005G182200.2	133	-	G	NB-ARC,NB-ARC superfamily,PLN03210,LRR_3 superfamily	NA
Sobic.005G182200.2	134	-	V	NB-ARC,NB-ARC superfamily,PLN03210,LRR_3 superfamily	NA
Sobic.005G182200.2	135	-	G	NB-ARC,NB-ARC superfamily,PLN03210,LRR_3 superfamily	NA
Sobic.005G182200.2	136	-	E	NB-ARC,NB-ARC superfamily,PLN03210,LRR_3 superfamily	NA
Sobic.005G182200.2	137	-	R	NB-ARC,NB-ARC superfamily,PLN03210,LRR_3 superfamily	NA
Sobic.005G182200.2	138	-	R	NB-ARC,NB-ARC superfamily,PLN03210,LRR_3 superfamily	NA
Sobic.005G182200.2	139	-	T	NB-ARC,NB-ARC superfamily,PLN03210,LRR_3 superfamily	NA
Sobic.005G182200.2	140	-	R	NB-ARC,NB-ARC superfamily,PLN03210,LRR_3 superfamily	NA
Sobic.005G182200.2	141	-	Y	NB-ARC,NB-ARC superfamily,PLN03210,LRR_3 superfamily	NA
Sobic.005G182200.2	142	-	G	NB-ARC,NB-ARC superfamily,PLN03210,LRR_3 superfamily	NA
Sobic.005G182200.2	143	-	V	NB-ARC,NB-ARC superfamily,PLN03210,LRR_3 superfamily	NA
Sobic.005G182200.2	144	-	K	NB-ARC,NB-ARC superfamily,PLN03210,LRR_3 superfamily	NA
Sobic.005G182200.2	145	-	D	NB-ARC,NB-ARC superfamily,PLN03210,LRR_3 superfamily	NA
Sobic.005G182200.2	146	-	P	NB-ARC,NB-ARC superfamily,PLN03210,LRR_3 superfamily	NA
Sobic.005G182200.2	147	-	G	NB-ARC,NB-ARC superfamily,PLN03210,LRR_3 superfamily	NA
Sobic.005G182200.2	148	-	P	NB-ARC,NB-ARC superfamily,PLN03210,LRR_3 superfamily	NA
Sobic.005G182200.2	149	-	P	NB-ARC,NB-ARC superfamily,PLN03210,LRR_3 superfamily	NA
Sobic.005G182200.2	150	-	G	NB-ARC,NB-ARC superfamily,PLN03210,LRR_3 superfamily	NA
Sobic.005G182200.2	151	-	P	NB-ARC,NB-ARC superfamily,PLN03210,LRR_3 superfamily	NA
Sobic.005G182200.2	152	-	D	NB-ARC,NB-ARC superfamily,PLN03210,LRR_3 superfamily	NA
Sobic.005G182200.2	153	-	A	NB-ARC,NB-ARC superfamily,PLN03210,LRR_3 superfamily	NA
Sobic.005G182200.2	154	-	T	NB-ARC,NB-ARC superfamily,PLN03210,LRR_3 superfamily	NA
Sobic.005G182200.2	155	-	A	NB-ARC,NB-ARC superfamily,PLN03210,LRR_3 superfamily	NA
Sobic.005G182200.2	156	-	S	NB-ARC,NB-ARC superfamily,PLN03210,LRR_3 superfamily	NA
Sobic.005G182200.2	157	-	A	NB-ARC,NB-ARC superfamily,PLN03210,LRR_3 superfamily	NA
Sobic.005G182200.2	158	-	A	NB-ARC,NB-ARC superfamily,PLN03210,LRR_3 superfamily	NA
Sobic.005G182200.2	159	-	S	NB-ARC,NB-ARC superfamily,PLN03210,LRR_3 superfamily	NA
Sobic.005G182200.2	160	-	S	NB-ARC,NB-ARC superfamily,PLN03210,LRR_3 superfamily	NA
Sobic.005G182200.2	161	-	R	NB-ARC,NB-ARC superfamily,PLN03210,LRR_3 superfamily	NA
Sobic.005G182200.2	162	-	A	NB-ARC,NB-ARC superfamily,PLN03210,LRR_3 superfamily	NA
Sobic.005G182200.2	163	-	A	NB-ARC,NB-ARC superfamily,PLN03210,LRR_3 superfamily	NA
Sobic.005G182200.2	164	-	A	NB-ARC,NB-ARC superfamily,PLN03210,LRR_3 superfamily	NA
Sobic.005G182200.2	165	-	P	NB-ARC,NB-ARC superfamily,PLN03210,LRR_3 superfamily	NA
Sobic.005G182200.2	166	-	S	NB-ARC,NB-ARC superfamily,PLN03210,LRR_3 superfamily	NA
Sobic.005G182200.2	167	-	Y	NB-ARC,NB-ARC superfamily,PLN03210,LRR_3 superfamily	NA
Sobic.005G182200.2	168	-	H	NB-ARC,NB-ARC superfamily,PLN03210,LRR_3 superfamily	NA
Sobic.005G182200.2	169	-	V	NB-ARC,NB-ARC superfamily,PLN03210,LRR_3 superfamily	NA
Sobic.005G182200.2	170	-	G	NB-ARC,NB-ARC superfamily,PLN03210,LRR_3 superfamily	NA
Sobic.005G182200.2	171	-	D	NB-ARC,NB-ARC superfamily,PLN03210,LRR_3 superfamily	NA
Sobic.005G182200.2	172	-	R	NB-ARC,NB-ARC superfamily,PLN03210,LRR_3 superfamily	NA
Sobic.005G182200.2	173	-	P	NB-ARC,NB-ARC superfamily,PLN03210,LRR_3 superfamily	NA
Sobic.005G182200.2	174	-	Q	NB-ARC,NB-ARC superfamily,PLN03210,LRR_3 superfamily	NA
Sobic.005G182200.2	175	-	P	NB-ARC,NB-ARC superfamily,PLN03210,LRR_3 superfamily	NA
Sobic.005G182200.2	176	-	G	NB-ARC,NB-ARC superfamily,PLN03210,LRR_3 superfamily	NA
Sobic.005G182200.2	177	-	R	NB-ARC,NB-ARC superfamily,PLN03210,LRR_3 superfamily	NA
Sobic.005G182200.2	178	-	Q	NB-ARC,NB-ARC superfamily,PLN03210,LRR_3 superfamily	NA
Sobic.005G182200.2	179	-	L	NB-ARC,NB-ARC superfamily,PLN03210,LRR_3 superfamily	NA
Sobic.005G182200.2	180	-	V	NB-ARC,NB-ARC superfamily,PLN03210,LRR_3 superfamily	NA
Sobic.005G182200.2	181	-	G	NB-ARC,NB-ARC superfamily,PLN03210,LRR_3 superfamily	NA
Sobic.005G182200.2	182	-	T	NB-ARC,NB-ARC superfamily,PLN03210,LRR_3 superfamily	NA
Sobic.005G182200.2	183	-	P	NB-ARC,NB-ARC superfamily,PLN03210,LRR_3 superfamily	NA
Sobic.005G182200.2	184	-	E	NB-ARC,NB-ARC superfamily,PLN03210,LRR_3 superfamily	NA
Sobic.005G182200.2	185	-	P	NB-ARC,NB-ARC superfamily,PLN03210,LRR_3 superfamily	NA
Sobic.005G182200.2	186	-	V	NB-ARC,NB-ARC superfamily,PLN03210,LRR_3 superfamily	NA
Sobic.005G182200.2	187	-	G	NB-ARC,NB-ARC superfamily,PLN03210,LRR_3 superfamily	NA
Sobic.003G393100.1	251	S	N	Smc,SMC_N superfamily,SMC_prok_A,SMC_N	NA
Sobic.003G393100.1	269	T	K	Smc,SMC_N superfamily,SMC_prok_A,SMC_N	NA
Sobic.002G203000.1	54	S	-	STKc_SnRK3,PKc_like superfamily,S_TKc,Pkinase superfamily,Pkinase,SPS1,PTZ00263	NA
Sobic.002G203000.1	55	S	-	STKc_SnRK3,PKc_like superfamily,S_TKc,Pkinase superfamily,Pkinase,SPS1,PTZ00263	NA
Sobic.002G203000.1	56	S	-	STKc_SnRK3,PKc_like superfamily,S_TKc,Pkinase superfamily,Pkinase,SPS1,PTZ00263	NA
Sobic.002G326800.1	31	-	D	Stress-antifung,Stress-antifung superfamily	NA
Sobic.002G326800.1	124	R	L	Stress-antifung,Stress-antifung superfamily	NA
Sobic.002G302000.1	64	N	T	GH16_XET,LamG superfamily	NA
Sobic.002G327500.1	38	-	P	Stress-antifung,Stress-antifung superfamily	NA
Sobic.002G327500.1	39	-	L	Stress-antifung,Stress-antifung superfamily	NA
Sobic.002G327500.1	40	-	F	Stress-antifung,Stress-antifung superfamily	NA
Sobic.002G327500.1	41	-	S	Stress-antifung,Stress-antifung superfamily	NA
Sobic.002G327500.1	42	-	L	Stress-antifung,Stress-antifung superfamily	NA
Sobic.002G327500.1	43	-	H	Stress-antifung,Stress-antifung superfamily	NA
Sobic.002G327500.1	44	-	S	Stress-antifung,Stress-antifung superfamily	NA
Sobic.002G327500.1	45	-	F	Stress-antifung,Stress-antifung superfamily	NA
Sobic.002G327500.1	46	-	R	Stress-antifung,Stress-antifung superfamily	NA
Sobic.002G327500.1	47	-	F	Stress-antifung,Stress-antifung superfamily	NA
Sobic.002G327500.1	48	-	A	Stress-antifung,Stress-antifung superfamily	NA
Sobic.002G327500.1	49	-	R	Stress-antifung,Stress-antifung superfamily	NA
Sobic.002G327500.1	50	-	L	Stress-antifung,Stress-antifung superfamily	NA
Sobic.002G327500.1	51	-	C	Stress-antifung,Stress-antifung superfamily	NA
Sobic.002G327500.1	52	-	Q	Stress-antifung,Stress-antifung superfamily	NA
Sobic.002G327500.1	53	-	T	Stress-antifung,Stress-antifung superfamily	NA
Sobic.002G327500.1	54	-	Q	Stress-antifung,Stress-antifung superfamily	NA
Sobic.002G327500.1	55	-	T	Stress-antifung,Stress-antifung superfamily	NA
Sobic.002G327500.1	56	-	P	Stress-antifung,Stress-antifung superfamily	NA
Sobic.002G327500.1	57	-	I	Stress-antifung,Stress-antifung superfamily	NA
Sobic.002G327500.1	58	-	R	Stress-antifung,Stress-antifung superfamily	NA
Sobic.002G327500.1	59	-	R	Stress-antifung,Stress-antifung superfamily	NA
Sobic.002G327500.1	60	-	L	Stress-antifung,Stress-antifung superfamily	NA
Sobic.002G327500.1	61	-	L	Stress-antifung,Stress-antifung superfamily	NA
Sobic.002G327500.1	62	-	P	Stress-antifung,Stress-antifung superfamily	NA
Sobic.002G327500.1	63	-	P	Stress-antifung,Stress-antifung superfamily	NA
Sobic.002G327500.1	64	-	Q	Stress-antifung,Stress-antifung superfamily	NA
Sobic.002G327500.1	65	-	T	Stress-antifung,Stress-antifung superfamily	NA
Sobic.002G327500.1	203	I	L	Stress-antifung,Stress-antifung superfamily	NA
Sobic.002G327500.1	205	S	D	Stress-antifung,Stress-antifung superfamily	NA
Sobic.002G327500.1	207	-	N	Stress-antifung,Stress-antifung superfamily	NA
Sobic.002G327500.1	209	N	D	Stress-antifung,Stress-antifung superfamily	NA
Sobic.002G327500.1	210	S	G	Stress-antifung,Stress-antifung superfamily	NA
Sobic.002G327500.1	211	D	R	Stress-antifung,Stress-antifung superfamily	NA
Sobic.002G327500.1	212	D	G	Stress-antifung,Stress-antifung superfamily	NA
Sobic.002G327500.1	213	K	T	Stress-antifung,Stress-antifung superfamily	NA
Sobic.002G327500.1	214	V	A	Stress-antifung,Stress-antifung superfamily	NA
Sobic.002G327500.1	216	I	V	Stress-antifung,Stress-antifung superfamily	NA
Sobic.002G327500.1	354	V	A	PLN00113,PLN00113 superfamily	NA
Sobic.002G327500.1	661	I	M	SPS1	NA
Sobic.002G327500.1	662	D	E	SPS1	NA
Sobic.003G139900.2	131	C	-	SBP,SBP superfamily	NA
Sobic.003G139900.2	132	Q	-	SBP,SBP superfamily	NA
Sobic.003G139900.2	133	V	-	SBP,SBP superfamily	NA
Sobic.003G139900.2	134	D	-	SBP,SBP superfamily	NA
Sobic.003G139900.2	135	G	-	SBP,SBP superfamily	NA
Sobic.003G139900.2	136	C	-	SBP,SBP superfamily	NA
Sobic.003G139900.2	137	H	-	SBP,SBP superfamily	NA
Sobic.003G139900.2	138	A	-	SBP,SBP superfamily	NA
Sobic.003G139900.2	139	D	-	SBP,SBP superfamily	NA
Sobic.003G139900.2	140	L	-	SBP,SBP superfamily	NA
Sobic.003G139900.2	141	S	-	SBP,SBP superfamily	NA
Sobic.003G139900.2	142	G	-	SBP,SBP superfamily	NA
Sobic.003G139900.2	143	A	-	SBP,SBP superfamily	NA
Sobic.003G139900.2	144	R	-	SBP,SBP superfamily	NA
Sobic.003G139900.2	145	D	-	SBP,SBP superfamily	NA
Sobic.003G139900.2	146	Y	-	SBP,SBP superfamily	NA
Sobic.003G139900.2	147	H	-	SBP,SBP superfamily	NA
Sobic.003G139900.2	148	K	-	SBP,SBP superfamily	NA
Sobic.003G139900.2	149	R	-	SBP,SBP superfamily	NA
Sobic.003G139900.2	150	H	-	SBP,SBP superfamily	NA
Sobic.003G139900.2	151	K	-	SBP,SBP superfamily	NA
Sobic.003G139900.2	152	V	-	SBP,SBP superfamily	NA
Sobic.003G139900.2	153	C	-	SBP,SBP superfamily	NA
Sobic.003G139900.2	154	E	-	SBP,SBP superfamily	NA
Sobic.003G139900.2	155	A	-	SBP,SBP superfamily	NA
Sobic.003G139900.2	156	H	-	SBP,SBP superfamily	NA
Sobic.003G139900.2	157	T	-	SBP,SBP superfamily	NA
Sobic.003G139900.2	158	R	-	SBP,SBP superfamily	NA
Sobic.003G139900.2	159	T	-	SBP,SBP superfamily	NA
Sobic.003G139900.2	160	T	-	SBP,SBP superfamily	NA
Sobic.003G139900.2	161	V	-	SBP,SBP superfamily	NA
Sobic.003G139900.2	162	V	-	SBP,SBP superfamily	NA
Sobic.003G139900.2	163	C	-	SBP,SBP superfamily	NA
Sobic.003G139900.2	164	I	-	SBP,SBP superfamily	NA
Sobic.003G139900.2	165	K	-	SBP,SBP superfamily	NA
Sobic.003G139900.2	166	N	-	SBP,SBP superfamily	NA
Sobic.003G139900.2	167	V	-	SBP,SBP superfamily	NA
Sobic.003G139900.2	168	E	-	SBP,SBP superfamily	NA
Sobic.003G139900.2	169	H	-	SBP,SBP superfamily	NA
Sobic.003G139900.2	170	R	-	SBP,SBP superfamily	NA
Sobic.003G139900.2	171	F	-	SBP,SBP superfamily	NA
Sobic.003G139900.2	172	C	-	SBP,SBP superfamily	NA
Sobic.003G139900.2	173	Q	-	SBP,SBP superfamily	NA
Sobic.003G139900.2	174	Q	-	SBP,SBP superfamily	NA
Sobic.003G139900.2	175	C	-	SBP,SBP superfamily	NA
Sobic.003G139900.2	176	S	-	SBP,SBP superfamily	NA
Sobic.003G139900.2	177	R	-	SBP,SBP superfamily	NA
Sobic.003G139900.2	178	F	-	SBP,SBP superfamily	NA
Sobic.003G139900.2	179	H	-	SBP,SBP superfamily	NA
Sobic.003G139900.2	180	L	-	SBP,SBP superfamily	NA
Sobic.003G139900.2	181	L	-	SBP,SBP superfamily	NA
Sobic.003G139900.2	182	Q	-	SBP,SBP superfamily	NA
Sobic.003G139900.2	183	E	-	SBP,SBP superfamily	NA
Sobic.003G139900.2	184	F	-	SBP,SBP superfamily	NA
Sobic.003G139900.2	185	D	-	SBP,SBP superfamily	NA
Sobic.003G139900.2	186	E	-	SBP,SBP superfamily	NA
Sobic.003G139900.2	187	G	-	SBP,SBP superfamily	NA
Sobic.003G139900.2	188	K	-	SBP,SBP superfamily	NA
Sobic.003G139900.2	189	K	-	SBP,SBP superfamily	NA
Sobic.003G139900.2	190	S	-	SBP,SBP superfamily	NA
Sobic.003G139900.2	191	C	-	SBP,SBP superfamily	NA
Sobic.003G139900.2	192	R	-	SBP,SBP superfamily	NA
Sobic.003G139900.2	193	S	-	SBP,SBP superfamily	NA
Sobic.003G139900.2	194	R	-	SBP,SBP superfamily	NA
Sobic.003G139900.2	195	L	-	SBP,SBP superfamily	NA
Sobic.003G139900.2	196	A	-	SBP,SBP superfamily	NA
Sobic.003G139900.2	197	K	-	SBP,SBP superfamily	NA
Sobic.003G139900.2	198	H	-	SBP,SBP superfamily	NA
Sobic.003G139900.2	199	N	-	SBP,SBP superfamily	NA
Sobic.003G139900.2	200	G	-	SBP,SBP superfamily	NA
Sobic.003G139900.2	201	R	-	SBP,SBP superfamily	NA
Sobic.003G139900.2	202	R	-	SBP,SBP superfamily	NA
Sobic.003G139900.2	203	R	-	SBP,SBP superfamily	NA
Sobic.003G139900.2	204	K	-	SBP,SBP superfamily	NA
Sobic.005G169400.1	35	L	S	Barwin,Barwin superfamily	NA
Sobic.005G169400.1	36	C	H	Barwin,Barwin superfamily	NA
Sobic.005G169400.1	37	S	L	Barwin,Barwin superfamily	NA
Sobic.005G169400.1	39	A	S	Barwin,Barwin superfamily	NA
Sobic.005G169400.1	40	A	L	Barwin,Barwin superfamily	NA
Sobic.005G169400.1	41	M	P	Barwin,Barwin superfamily	NA
Sobic.005G169400.1	42	A	V	Barwin,Barwin superfamily	NA
Sobic.005G169400.1	43	A	G	Barwin,Barwin superfamily	NA
Sobic.005G169400.1	44	A	V	Barwin,Barwin superfamily	NA
Sobic.005G169400.1	45	Q	D	Barwin,Barwin superfamily	NA
Sobic.005G169400.1	46	Q	L	Barwin,Barwin superfamily	NA
Sobic.005G169400.1	47	A	L	Barwin,Barwin superfamily	NA
Sobic.005G169400.1	48	S	E	Barwin,Barwin superfamily	NA
Sobic.005G169400.1	49	N	H	Barwin,Barwin superfamily	NA
Sobic.005G169400.1	50	-	R	Barwin,Barwin superfamily	NA
Sobic.005G169400.1	51	-	L	Barwin,Barwin superfamily	NA
Sobic.005G169400.1	52	-	V	Barwin,Barwin superfamily	NA
Sobic.005G169400.1	53	-	V	Barwin,Barwin superfamily	NA
Sobic.005G169400.1	54	-	E	Barwin,Barwin superfamily	NA
Sobic.005G169400.1	55	-	V	Barwin,Barwin superfamily	NA
Sobic.005G169400.1	56	-	E	Barwin,Barwin superfamily	NA
Sobic.005G169400.1	57	V	A	Barwin,Barwin superfamily	NA
Sobic.005G169400.1	58	R	A	Barwin,Barwin superfamily	NA
Sobic.005G169400.1	59	A	I	Barwin,Barwin superfamily	NA
Sobic.005G169400.1	60	T	A	Barwin,Barwin superfamily	NA
Sobic.005G169400.1	61	Y	A	Barwin,Barwin superfamily	NA
Sobic.005G169400.1	62	H	L	Barwin,Barwin superfamily	NA
Sobic.005G169400.1	63	Y	V	Barwin,Barwin superfamily	NA
Sobic.005G169400.1	64	Y	H	Barwin,Barwin superfamily	NA
Sobic.005G169400.1	65	N	D	Barwin,Barwin superfamily	NA
Sobic.005G169400.1	67	Q	R	Barwin,Barwin superfamily	NA
Sobic.005G169400.1	68	Q	R	Barwin,Barwin superfamily	NA
Sobic.005G169400.1	69	N	D	Barwin,Barwin superfamily	NA
Sobic.005G169400.1	70	N	G	Barwin,Barwin superfamily	NA
Sobic.005G169400.1	71	W	R	Barwin,Barwin superfamily	NA
Sobic.005G169400.1	72	N	P	Barwin,Barwin superfamily	NA
Sobic.005G169400.1	73	L	R	Barwin,Barwin superfamily	NA
Sobic.005G169400.1	74	N	R	Barwin,Barwin superfamily	NA
Sobic.005G169400.1	77	S	R	Barwin,Barwin superfamily	NA
Sobic.005G169400.1	78	A	H	Barwin,Barwin superfamily	NA
Sobic.005G169400.1	79	Y	P	Barwin,Barwin superfamily	NA
Sobic.005G169400.1	80	C	D	Barwin,Barwin superfamily	NA
Sobic.005G169400.1	81	S	A	Barwin,Barwin superfamily	NA
Sobic.005G169400.1	82	T	L	Barwin,Barwin superfamily	NA
Sobic.005G169400.1	83	W	A	Barwin,Barwin superfamily	NA
Sobic.005G169400.1	84	D	A	Barwin,Barwin superfamily	NA
Sobic.005G169400.1	85	A	G	Barwin,Barwin superfamily	NA
Sobic.005G169400.1	87	K	L	Barwin,Barwin superfamily	NA
Sobic.005G169400.1	90	A	L	Barwin,Barwin superfamily	NA
Sobic.005G169400.1	91	W	P	Barwin,Barwin superfamily	NA
Sobic.005G169400.1	93	-	G	Barwin,Barwin superfamily	NA
Sobic.005G169400.1	94	Q	P	Barwin,Barwin superfamily	NA
Sobic.005G169400.1	95	K	A	Barwin,Barwin superfamily	NA
Sobic.005G169400.1	96	Y	E	Barwin,Barwin superfamily	NA
Sobic.005G169400.1	98	W	R	Barwin,Barwin superfamily	NA
Sobic.005G169400.1	99	T	P	Barwin,Barwin superfamily	NA
Sobic.005G169400.1	101	F	V	Barwin,Barwin superfamily	NA
Sobic.005G169400.1	102	C	L	Barwin,Barwin superfamily	NA
Sobic.005G169400.1	103	G	L	Barwin,Barwin superfamily	NA
Sobic.005G169400.1	105	-	P	Barwin,Barwin superfamily	NA
Sobic.005G169400.1	106	-	R	Barwin,Barwin superfamily	NA
Sobic.005G169400.1	107	-	Q	Barwin,Barwin superfamily	NA
Sobic.005G169400.1	108	-	R	Barwin,Barwin superfamily	NA
Sobic.005G169400.1	109	-	L	Barwin,Barwin superfamily	NA
Sobic.005G169400.1	112	Q	V	Barwin,Barwin superfamily	NA
Sobic.005G169400.1	113	K	P	Barwin,Barwin superfamily	NA
Sobic.005G169400.1	115	Q	G	Barwin,Barwin superfamily	NA
Sobic.005G169400.1	117	A	V	Barwin,Barwin superfamily	NA
Sobic.005G169400.1	118	C	G	Barwin,Barwin superfamily	NA
Sobic.005G169400.1	119	G	A	Barwin,Barwin superfamily	NA
Sobic.005G169400.1	120	K	D	Barwin,Barwin superfamily	NA
Sobic.005G169400.1	121	C	G	Barwin,Barwin superfamily	NA
Sobic.005G169400.1	122	I	V	Barwin,Barwin superfamily	NA
Sobic.005G169400.1	123	R	E	Barwin,Barwin superfamily	NA
Sobic.005G169400.1	125	T	P	Barwin,Barwin superfamily	NA
Sobic.005G169400.1	126	N	V	Barwin,Barwin superfamily	NA
Sobic.005G169400.1	127	R	V	Barwin,Barwin superfamily	NA
Sobic.005G169400.1	128	A	L	Barwin,Barwin superfamily	NA
Sobic.005G169400.1	129	T	L	Barwin,Barwin superfamily	NA
Sobic.005G169400.1	130	G	R	Barwin,Barwin superfamily	NA
Sobic.005G169400.1	131	A	V	Barwin,Barwin superfamily	NA
Sobic.005G169400.1	132	A	V	Barwin,Barwin superfamily	NA
Sobic.005G169400.1	133	I	V	Barwin,Barwin superfamily	NA
Sobic.005G169400.1	134	T	V	Barwin,Barwin superfamily	NA
Sobic.005G169400.1	135	A	V	Barwin,Barwin superfamily	NA
Sobic.005G169400.1	137	-	R	Barwin,Barwin superfamily	NA
Sobic.005G169400.1	138	-	P	Barwin,Barwin superfamily	NA
Sobic.005G169400.1	139	-	H	Barwin,Barwin superfamily	NA
Sobic.005G169400.1	140	-	V	Barwin,Barwin superfamily	NA
Sobic.005G169400.1	141	-	R	Barwin,Barwin superfamily	NA
Sobic.005G169400.1	142	-	R	Barwin,Barwin superfamily	NA
Sobic.005G169400.1	143	-	L	Barwin,Barwin superfamily	NA
Sobic.005G169400.1	144	I	L	Barwin,Barwin superfamily	NA
Sobic.005G169400.1	145	V	R	Barwin,Barwin superfamily	NA
Sobic.005G169400.1	146	D	R	Barwin,Barwin superfamily	NA
Sobic.005G169400.1	147	Q	R	Barwin,Barwin superfamily	NA
Sobic.005G169400.1	148	C	H	Barwin,Barwin superfamily	NA
Sobic.005G169400.1	149	S	G	Barwin,Barwin superfamily	NA
Sobic.005G169400.1	150	N	R	Barwin,Barwin superfamily	NA
Sobic.005G169400.1	151	G	H	Barwin,Barwin superfamily	NA
Sobic.005G169200.1	48	N	D	Barwin,Barwin superfamily	NA
Sobic.001G004800.1	107	-	S	SASA,SASA superfamily	NA
Sobic.001G004800.1	108	-	G	SASA,SASA superfamily	NA
Sobic.001G004800.1	109	-	G	SASA,SASA superfamily	NA
Sobic.001G004800.1	164	N	-	SASA,SASA superfamily	NA
Sobic.001G004800.1	165	N	-	SASA,SASA superfamily	NA
Sobic.002G329100.1	68	-	T	Stress-antifung,Stress-antifung superfamily	NA
Sobic.002G329100.1	69	T	A	Stress-antifung,Stress-antifung superfamily	NA
Sobic.002G329100.1	73	V	A	Stress-antifung,Stress-antifung superfamily	NA
Sobic.002G329100.1	122	I	V	Stress-antifung,Stress-antifung superfamily	NA
Sobic.006G259600.1	8	G	V	PLN02756,PKc_like superfamily	NA
Sobic.006G259600.1	23	T	A	PLN02756,PKc_like superfamily,COG4857	NA
Sobic.006G259600.1	292	N	S	PLN02756,PKc_like superfamily,COG4857,MTRK,APH,APH superfamily	NA
Sobic.005G033100.1	375	R	K	PLN02736,AMP-binding superfamily,LC-FACS_euk,AFD_class_I superfamily,FAA1,AMP-binding,menE	NA
Sobic.005G033100.1	524	G	S	PLN02736,AMP-binding superfamily,LC-FACS_euk,AFD_class_I superfamily,FAA1,AMP-binding,menE	NA
Sobic.005G033100.1	608	E	Q	PLN02736,AMP-binding superfamily,LC-FACS_euk,AFD_class_I superfamily,FAA1	NA
Sobic.005G033100.1	670	Q	P	PLN02736,AMP-binding superfamily,LC-FACS_euk,AFD_class_I superfamily,FAA1	NA
Sobic.001G036300.1	80	D	E	M1_LTA4H,GluZincin superfamily,leuko_A4_hydro,Peptidase_M1 superfamily,PepN,Peptidase_M1	NA
Sobic.005G084300.1	148	I	V	GH18_narbonin,GH18_chitinase-like superfamily,Glyco_hydro_18,Glyco_hydro_18 superfamily,Chi1,Glyco_18	NA
Sobic.005G084300.1	213	N	D	GH18_narbonin,GH18_chitinase-like superfamily,Glyco_hydro_18,Glyco_hydro_18 superfamily	NA
Sobic.005G084300.1	214	N	E	GH18_narbonin,GH18_chitinase-like superfamily,Glyco_hydro_18,Glyco_hydro_18 superfamily	NA
Sobic.003G178700.1	308	D	G	PLN02377,PLN03169 superfamily,FAE1_CUT1_RppA,cond_enzymes superfamily,CHS_like,BH0617,FabH superfamily,fabH	NA
Sobic.004G143900.1	100	Q	E	PLN02460,ICL_KPHMT superfamily	NA
Sobic.006G050500.2	89	C	R	ICL_PEPM,ICL_KPHMT superfamily,PrpB,prpB,PEP_mutase	NA
Sobic.001G534532.1	157	G	D	STKc_IRAK,PKc_like superfamily,STYKc,Pkinase superfamily,Pkinase,SPS1,PLN00113,PLN00113 superfamily,TOMM_kin_cyc	NA
Sobic.001G534532.1	158	-	G	STKc_IRAK,PKc_like superfamily,STYKc,Pkinase superfamily,Pkinase,SPS1,PLN00113,PLN00113 superfamily,TOMM_kin_cyc	NA
Sobic.001G534532.1	159	-	N	STKc_IRAK,PKc_like superfamily,STYKc,Pkinase superfamily,Pkinase,SPS1,PLN00113,PLN00113 superfamily,TOMM_kin_cyc	NA
Sobic.001G534532.1	160	-	G	STKc_IRAK,PKc_like superfamily,STYKc,Pkinase superfamily,Pkinase,SPS1,PLN00113,PLN00113 superfamily,TOMM_kin_cyc	NA
Sobic.001G534532.1	161	-	G	STKc_IRAK,PKc_like superfamily,STYKc,Pkinase superfamily,Pkinase,SPS1,PLN00113,PLN00113 superfamily,TOMM_kin_cyc	NA
Sobic.001G534532.1	162	-	T	STKc_IRAK,PKc_like superfamily,STYKc,Pkinase superfamily,Pkinase,SPS1,PLN00113,PLN00113 superfamily,TOMM_kin_cyc	NA
Sobic.001G534532.1	163	A	V	STKc_IRAK,PKc_like superfamily,STYKc,Pkinase superfamily,Pkinase,SPS1,PLN00113,PLN00113 superfamily,TOMM_kin_cyc	NA
Sobic.001G534532.1	303	A	G	STKc_IRAK,PKc_like superfamily	NA
Sobic.009G073100.1	299	A	T	zip,Zip superfamily,PLN02159,Zip,ZupT	NA
Sobic.004G109100.3	180	S	G	RING-H2_PA-TM-RING,RING_Ubox superfamily,zf-RING_2,PHA02929,PHA02929 superfamily,COG5540,zf-rbx1 superfamily,RING	RING-H2 finger (C3H2C3-type),Zn binding site
Sobic.009G072100.1	113	Y	-	ZnF_C3H1,zf-CCCH superfamily,zf-CCCH	NA
Sobic.009G072100.1	114	S	-	ZnF_C3H1,zf-CCCH superfamily,zf-CCCH	NA
Sobic.009G072100.1	115	G	-	ZnF_C3H1,zf-CCCH superfamily,zf-CCCH	NA
Sobic.009G072100.1	116	A	-	ZnF_C3H1,zf-CCCH superfamily,zf-CCCH	NA
Sobic.009G072100.1	117	A	-	ZnF_C3H1,zf-CCCH superfamily,zf-CCCH	NA
Sobic.009G072100.1	118	C	-	ZnF_C3H1,zf-CCCH superfamily,zf-CCCH	NA
Sobic.009G072100.1	119	P	-	ZnF_C3H1,zf-CCCH superfamily,zf-CCCH	NA
Sobic.009G072100.1	120	D	-	ZnF_C3H1,zf-CCCH superfamily,zf-CCCH	NA
Sobic.009G072100.1	121	F	-	ZnF_C3H1,zf-CCCH superfamily,zf-CCCH	NA
Sobic.009G072100.1	122	R	-	ZnF_C3H1,zf-CCCH superfamily,zf-CCCH	NA
Sobic.009G072100.1	123	K	-	ZnF_C3H1,zf-CCCH superfamily,zf-CCCH	NA
Sobic.009G072100.1	124	G	-	ZnF_C3H1,zf-CCCH superfamily,zf-CCCH	NA
Sobic.009G072100.1	125	G	-	ZnF_C3H1,zf-CCCH superfamily,zf-CCCH	NA
Sobic.009G072100.1	126	C	-	ZnF_C3H1,zf-CCCH superfamily,zf-CCCH	NA
Sobic.009G072100.1	127	K	-	ZnF_C3H1,zf-CCCH superfamily,zf-CCCH	NA
Sobic.009G072100.1	128	R	-	ZnF_C3H1,zf-CCCH superfamily,zf-CCCH	NA
Sobic.009G072100.1	129	G	-	ZnF_C3H1,zf-CCCH superfamily,zf-CCCH	NA
Sobic.009G072100.1	130	D	-	ZnF_C3H1,zf-CCCH superfamily,zf-CCCH	NA
Sobic.009G072100.1	131	A	-	ZnF_C3H1,zf-CCCH superfamily,zf-CCCH	NA
Sobic.009G072100.1	132	C	-	ZnF_C3H1,zf-CCCH superfamily,zf-CCCH	NA
Sobic.009G072100.1	133	E	-	ZnF_C3H1,zf-CCCH superfamily,zf-CCCH	NA
Sobic.009G072100.1	134	Y	-	ZnF_C3H1,zf-CCCH superfamily,zf-CCCH	NA
Sobic.009G072100.1	135	A	-	ZnF_C3H1,zf-CCCH superfamily,zf-CCCH	NA
Sobic.009G072100.1	136	H	-	ZnF_C3H1,zf-CCCH superfamily,zf-CCCH	NA
Sobic.009G072100.1	137	G	-	ZnF_C3H1,zf-CCCH superfamily,zf-CCCH	NA
Sobic.009G072100.1	138	V	-	zf-CCCH	NA
Sobic.005G052000.1	158	D	H	S_TKc,PLN00113,PLN00113 superfamily	NA
Sobic.009G009800.1	61	I	L	potato_inhibit,potato_inhibit superfamily	NA
Sobic.006G121200.2	62	T	M	NAR2,NAR2 superfamily	NA
Sobic.006G121200.2	124	A	T	NAR2,NAR2 superfamily	NA
Sobic.003G079700.1	346	N	S	STKc_IRAK,PKc_like superfamily,Pkinase,Pkinase superfamily,TyrKc,SPS1,TOMM_kin_cyc	NA
Sobic.003G079700.1	439	H	Q	STKc_IRAK,PKc_like superfamily,Pkinase,Pkinase superfamily,TyrKc,SPS1,PLN00113,PLN00113 superfamily,TOMM_kin_cyc	NA
Sobic.003G079700.1	474	C	W	STKc_IRAK,PKc_like superfamily,Pkinase,Pkinase superfamily,TyrKc,SPS1,PLN00113,PLN00113 superfamily,TOMM_kin_cyc	NA
Sobic.003G079700.1	493	V	I	STKc_IRAK,PKc_like superfamily,Pkinase,Pkinase superfamily,TyrKc,SPS1,PLN00113,PLN00113 superfamily,TOMM_kin_cyc	NA
Sobic.003G413201.1	112	G	E	PLN00113,PLN00113 superfamily	NA
Sobic.003G413201.1	149	A	D	PLN00113,PLN00113 superfamily	NA
Sobic.004G323800.1	231	G	S	prfB,RF-1 superfamily,PrfB,PCRF,PCRF superfamily	NA
Sobic.002G317800.1	143	I	V	Sialidase_non-viral,Sialidase superfamily,COG4692,COG4692 superfamily
Sobic.002G317800.1	341	E	D	BNR_2,BNR_2 superfamily,Sialidase_non-viral,Sialidase superfamily,COG4692,COG4692 superfamily	NA
Sobic.002G317800.1	421	V	I	Sialidase_non-viral,Sialidase superfamily,COG4692,COG4692 superfamily	NA
Sobic.009G159900.1	187	G	V	POX,POX superfamily	NA
Sobic.009G159900.1	207	S	P	POX,POX superfamily	NA
Sobic.009G159900.1	272	E	G	POX,POX superfamily	NA
Sobic.002G201600.1	475	F	L	Methyltransf_29,Methyltransf_29 superfamily	NA
Sobic.002G201600.1	564	I	V	Methyltransf_29,Methyltransf_29 superfamily	NA
Sobic.006G266200.3	1	-	M	PLN02826,PRK08318 superfamily	NA
Sobic.006G266200.3	2	-	S	PLN02826,PRK08318 superfamily	NA
Sobic.006G266200.3	3	-	S	PLN02826,PRK08318 superfamily	NA
Sobic.006G266200.3	4	-	S	PLN02826,PRK08318 superfamily	NA
Sobic.006G266200.3	5	-	A	PLN02826,PRK08318 superfamily	NA
Sobic.006G266200.3	6	-	A	PLN02826,PRK08318 superfamily	NA
Sobic.006G266200.3	7	-	A	PLN02826,PRK08318 superfamily	NA
Sobic.006G266200.3	8	-	L	PLN02826,PRK08318 superfamily	NA
Sobic.006G266200.3	9	-	A	PLN02826,PRK08318 superfamily	NA
Sobic.006G266200.3	10	-	W	PLN02826,PRK08318 superfamily	NA
Sobic.006G266200.3	11	-	R	PLN02826,PRK08318 superfamily	NA
Sobic.006G266200.3	12	-	R	PLN02826,PRK08318 superfamily	NA
Sobic.006G266200.3	13	-	T	PLN02826,PRK08318 superfamily	NA
Sobic.006G266200.3	14	-	L	PLN02826,PRK08318 superfamily	NA
Sobic.006G266200.3	15	-	R	PLN02826,PRK08318 superfamily	NA
Sobic.006G266200.3	16	-	D	PLN02826,PRK08318 superfamily	NA
Sobic.006G266200.3	17	-	A	PLN02826,PRK08318 superfamily	NA
Sobic.006G266200.3	18	-	L	PLN02826,PRK08318 superfamily	NA
Sobic.006G266200.3	19	-	L	PLN02826,PRK08318 superfamily	NA
Sobic.006G266200.3	20	-	R	PLN02826,PRK08318 superfamily	NA
Sobic.006G266200.3	21	-	G	PLN02826,PRK08318 superfamily	NA
Sobic.006G266200.3	22	-	S	PLN02826,PRK08318 superfamily	NA
Sobic.006G266200.3	23	-	A	PLN02826,PRK08318 superfamily	NA
Sobic.006G266200.3	24	-	C	PLN02826,PRK08318 superfamily	NA
Sobic.006G266200.3	25	-	R	PLN02826,PRK08318 superfamily	NA
Sobic.006G266200.3	26	-	G	PLN02826,PRK08318 superfamily	NA
Sobic.006G266200.3	27	-	A	PLN02826,PRK08318 superfamily	NA
Sobic.006G266200.3	28	-	A	PLN02826,PRK08318 superfamily	NA
Sobic.006G266200.3	29	-	P	PLN02826,PRK08318 superfamily	NA
Sobic.006G266200.3	30	-	V	PLN02826,PRK08318 superfamily,pyrD_sub2	NA
Sobic.006G266200.3	31	-	R	PLN02826,PRK08318 superfamily,pyrD_sub2	NA
Sobic.006G266200.3	32	-	Y	PLN02826,PRK08318 superfamily,pyrD_sub2	NA
Sobic.006G266200.3	33	-	G	PLN02826,PRK08318 superfamily,DHOD_2_like,TIM_phosphate_binding superfamily,pyrD_sub2	NA
Sobic.006G266200.3	34	-	S	PLN02826,PRK08318 superfamily,DHOD_2_like,TIM_phosphate_binding superfamily,pyrD_sub2	NA
Sobic.006G266200.3	35	-	T	PLN02826,PRK08318 superfamily,DHOD_2_like,TIM_phosphate_binding superfamily,pyrD_sub2	NA
Sobic.006G266200.3	36	-	A	PLN02826,PRK08318 superfamily,DHOD_2_like,TIM_phosphate_binding superfamily,pyrD_sub2	NA
Sobic.006G266200.3	37	-	S	PLN02826,PRK08318 superfamily,DHOD_2_like,TIM_phosphate_binding superfamily,pyrD_sub2	NA
Sobic.006G266200.3	38	-	A	PLN02826,PRK08318 superfamily,DHOD_2_like,TIM_phosphate_binding superfamily,pyrD_sub2	NA
Sobic.006G266200.3	39	-	S	PLN02826,PRK08318 superfamily,DHOD_2_like,TIM_phosphate_binding superfamily,pyrD_sub2	NA
Sobic.006G266200.3	40	-	G	PLN02826,PRK08318 superfamily,DHOD_2_like,TIM_phosphate_binding superfamily,pyrD_sub2	NA
Sobic.006G266200.3	41	-	A	PLN02826,PRK08318 superfamily,DHOD_2_like,TIM_phosphate_binding superfamily,pyrD_sub2	NA
Sobic.006G266200.3	42	-	A	PLN02826,PRK08318 superfamily,DHOD_2_like,TIM_phosphate_binding superfamily,pyrD_sub2	NA
Sobic.006G266200.3	43	-	A	PLN02826,PRK08318 superfamily,DHOD_2_like,TIM_phosphate_binding superfamily,pyrD_sub2	NA
Sobic.006G266200.3	44	-	E	PLN02826,PRK08318 superfamily,DHOD_2_like,TIM_phosphate_binding superfamily,pyrD_sub2	NA
Sobic.006G266200.3	45	-	A	PLN02826,PRK08318 superfamily,DHOD_2_like,TIM_phosphate_binding superfamily,pyrD_sub2	quinone interaction residues
Sobic.006G266200.3	46	-	A	PLN02826,PRK08318 superfamily,DHOD_2_like,TIM_phosphate_binding superfamily,pyrD_sub2	NA
Sobic.006G266200.3	47	-	A	PLN02826,PRK08318 superfamily,DHOD_2_like,TIM_phosphate_binding superfamily,pyrD_sub2	NA
Sobic.006G266200.3	48	-	T	PLN02826,PRK08318 superfamily,DHOD_2_like,TIM_phosphate_binding superfamily,pyrD_sub2	NA
Sobic.006G266200.3	49	-	A	PLN02826,PRK08318 superfamily,DHOD_2_like,TIM_phosphate_binding superfamily,pyrD_sub2	NA
Sobic.006G266200.3	50	-	A	PLN02826,PRK08318 superfamily,DHOD_2_like,TIM_phosphate_binding superfamily,pyrD_sub2	NA
Sobic.006G266200.3	51	-	P	PLN02826,PRK08318 superfamily,DHOD_2_like,TIM_phosphate_binding superfamily,pyrD_sub2	NA
Sobic.006G266200.3	52	-	K	PLN02826,PRK08318 superfamily,DHOD_2_like,TIM_phosphate_binding superfamily,pyrD_sub2	NA
Sobic.006G266200.3	53	-	K	PLN02826,PRK08318 superfamily,DHOD_2_like,TIM_phosphate_binding superfamily,pyrD_sub2	NA
Sobic.006G266200.3	54	-	V	PLN02826,PRK08318 superfamily,DHOD_2_like,TIM_phosphate_binding superfamily,pyrD_sub2	NA
Sobic.006G266200.3	55	-	P	PLN02826,PRK08318 superfamily,DHOD_2_like,TIM_phosphate_binding superfamily,pyrD_sub2	NA
Sobic.006G266200.3	56	-	P	PLN02826,PRK08318 superfamily,DHOD_2_like,TIM_phosphate_binding superfamily,pyrD_sub2	NA
Sobic.006G266200.3	57	-	P	PLN02826,PRK08318 superfamily,DHOD_2_like,TIM_phosphate_binding superfamily,pyrD_sub2	NA
Sobic.006G266200.3	58	-	P	PLN02826,PRK08318 superfamily,DHOD_2_like,TIM_phosphate_binding superfamily,pyrD_sub2	NA
Sobic.006G266200.3	59	-	R	PLN02826,PRK08318 superfamily,DHOD_2_like,TIM_phosphate_binding superfamily,pyrD_sub2	NA
Sobic.006G266200.3	60	-	K	PLN02826,PRK08318 superfamily,DHOD_2_like,TIM_phosphate_binding superfamily,pyrD_sub2	NA
Sobic.006G266200.3	61	-	G	PLN02826,PRK08318 superfamily,DHOD_2_like,TIM_phosphate_binding superfamily,pyrD_sub2	NA
Sobic.006G266200.3	62	-	R	PLN02826,PRK08318 superfamily,DHOD_2_like,TIM_phosphate_binding superfamily,pyrD_sub2	NA
Sobic.006G266200.3	63	-	L	PLN02826,PRK08318 superfamily,DHOD_2_like,TIM_phosphate_binding superfamily,pyrD_sub2	NA
Sobic.006G266200.3	64	-	L	PLN02826,PRK08318 superfamily,DHOD_2_like,TIM_phosphate_binding superfamily,pyrD_sub2	NA
Sobic.006G266200.3	65	-	T	PLN02826,PRK08318 superfamily,DHOD_2_like,TIM_phosphate_binding superfamily,pyrD_sub2	NA
Sobic.006G266200.3	66	-	G	PLN02826,PRK08318 superfamily,DHOD_2_like,TIM_phosphate_binding superfamily,pyrD_sub2,DHO_dh	NA
Sobic.006G266200.3	67	-	A	PLN02826,PRK08318 superfamily,DHOD_2_like,TIM_phosphate_binding superfamily,pyrD_sub2,PyrD,ICL_KPHMT superfamily,DHO_dh	NA
Sobic.006G266200.3	376	I	T	PLN02826,PRK08318 superfamily,DHOD_2_like,TIM_phosphate_binding superfamily,pyrD_sub2,PyrD,ICL_KPHMT superfamily,DHO_dh	NA
Sobic.009G074300.1	453	V	M	PLN03141,p450 superfamily,p450,CypX	NA
Sobic.001G030600.1	153	C	F	PLN02410,Glycosyltransferase_GTB_type superfamily,UDPGT,UDPGT superfamily,GT1_Gtf_like,YjiC,MGT	NA
Sobic.006G164300.1	342	S	R	OPT,OPT superfamily,OPT_sfam	NA
Sobic.009G057700.1	151	T	A	zip,Zip superfamily,PLN02159,Zip	NA
Sobic.009G057700.1	188	H	N	zip,Zip superfamily,PLN02159,Zip	NA
Sobic.006G177800.1	742	M	V	PreP,Peptidase_S9_N superfamily	NA
Sobic.008G052900.1	60	R	-	COG2905,IMP_dehydrog,IMPDH superfamily	NA
Sobic.008G052900.1	61	T	-	COG2905,IMP_dehydrog,IMPDH superfamily	NA
Sobic.008G052900.1	62	V	-	COG2905,IMP_dehydrog,IMPDH superfamily	NA
Sobic.008G052900.1	63	K	-	COG2905,IMP_dehydrog,IMPDH superfamily	NA
Sobic.008G052900.1	64	K	-	COG2905,IMP_dehydrog,IMPDH superfamily	NA
Sobic.008G052900.1	65	L	-	COG2905,IMP_dehydrog,IMPDH superfamily	NA
Sobic.008G052900.1	66	R	-	COG2905,IMP_dehydrog,IMPDH superfamily	NA
Sobic.008G052900.1	67	L	-	COG2905,IMP_dehydrog,IMPDH superfamily	NA
Sobic.008G052900.1	68	S	-	CBS_pair_CAP-ED_DUF294_PBI_assoc,CBS_pair superfamily,COG2905,IMP_dehydrog,IMPDH superfamily	NA
Sobic.008G052900.1	69	K	-	CBS_pair_CAP-ED_DUF294_PBI_assoc,CBS_pair superfamily,COG2905,IMP_dehydrog,IMPDH superfamily	NA
Sobic.008G052900.1	70	A	-	CBS_pair_CAP-ED_DUF294_PBI_assoc,CBS_pair superfamily,COG2905,IMP_dehydrog,IMPDH superfamily	NA
Sobic.008G052900.1	71	L	-	CBS_pair_CAP-ED_DUF294_PBI_assoc,CBS_pair superfamily,COG2905,IMP_dehydrog,IMPDH superfamily	NA
Sobic.008G052900.1	72	T	-	CBS_pair_CAP-ED_DUF294_PBI_assoc,CBS_pair superfamily,COG2905,IMP_dehydrog,IMPDH superfamily,PRK05567	NA
Sobic.008G052900.1	73	I	-	CBS_pair_CAP-ED_DUF294_PBI_assoc,CBS_pair superfamily,COG2905,IMP_dehydrog,IMPDH superfamily,PRK05567	NA
Sobic.008G052900.1	74	P	-	CBS_pair_CAP-ED_DUF294_PBI_assoc,CBS_pair superfamily,COG2905,IMP_dehydrog,IMPDH superfamily,PRK05567	NA
Sobic.008G052900.1	75	E	-	CBS_pair_CAP-ED_DUF294_PBI_assoc,CBS_pair superfamily,COG2905,IMP_dehydrog,IMPDH superfamily,PRK05567	NA
Sobic.008G052900.1	76	G	-	CBS_pair_CAP-ED_DUF294_PBI_assoc,CBS_pair superfamily,COG2905,IMP_dehydrog,IMPDH superfamily,PRK05567	NA
Sobic.008G052900.1	77	T	-	CBS_pair_CAP-ED_DUF294_PBI_assoc,CBS_pair superfamily,COG2905,IMP_dehydrog,IMPDH superfamily,PRK05567	NA
Sobic.008G052900.1	78	T	-	CBS_pair_CAP-ED_DUF294_PBI_assoc,CBS_pair superfamily,COG2905,IMP_dehydrog,IMPDH superfamily,PRK05567	NA
Sobic.008G052900.1	79	V	-	CBS_pair_CAP-ED_DUF294_PBI_assoc,CBS_pair superfamily,COG2905,IMP_dehydrog,IMPDH superfamily,PRK05567	NA
Sobic.008G052900.1	80	S	-	CBS_pair_CAP-ED_DUF294_PBI_assoc,CBS_pair superfamily,COG2905,IMP_dehydrog,IMPDH superfamily,PRK05567	NA
Sobic.008G052900.1	81	D	-	CBS_pair_CAP-ED_DUF294_PBI_assoc,CBS_pair superfamily,COG2905,IMP_dehydrog,IMPDH superfamily,PRK05567	NA
Sobic.008G052900.1	82	A	-	CBS_pair_CAP-ED_DUF294_PBI_assoc,CBS_pair superfamily,COG2905,IMP_dehydrog,IMPDH superfamily,PRK05567	NA
Sobic.008G052900.1	83	C	-	CBS_pair_CAP-ED_DUF294_PBI_assoc,CBS_pair superfamily,COG2905,IMP_dehydrog,IMPDH superfamily,PRK05567	NA
Sobic.008G052900.1	84	R	-	CBS_pair_CAP-ED_DUF294_PBI_assoc,CBS_pair superfamily,COG2905,IMP_dehydrog,IMPDH superfamily,PRK05567	NA
Sobic.008G052900.1	85	R	-	CBS_pair_CAP-ED_DUF294_PBI_assoc,CBS_pair superfamily,COG2905,IMP_dehydrog,IMPDH superfamily,PRK05567	NA
Sobic.008G052900.1	204	C	R	PRK14869,DHHA2 superfamily	NA
Sobic.003G229700.1	116	C	G	PLN02177,PLN02177 superfamily	NA
Sobic.003G229700.1	181	N	K	PLN02177,PLN02177 superfamily	NA
Sobic.003G229700.1	376	L	P	PLN02177,PLN02177 superfamily,LPLAT,LPLAT superfamily,AGP_acyltrn,PlsC,PlsC superfamily	NA
Sobic.003G213000.1	14	I	V	MtN3_slv,PQ-loop superfamily	NA
Sobic.004G037200.1	1	M	-	PLN03012,SQHop_cyclase_C superfamily	NA
Sobic.004G037200.1	2	W	-	PLN03012,SQHop_cyclase_C superfamily	NA
Sobic.004G037200.1	3	R	-	PLN03012,SQHop_cyclase_C superfamily	NA
Sobic.004G037200.1	4	L	-	PLN03012,SQHop_cyclase_C superfamily	NA
Sobic.004G037200.1	5	R	-	PLN03012,SQHop_cyclase_C superfamily	NA
Sobic.004G037200.1	6	I	-	PLN03012,SQHop_cyclase_C superfamily	NA
Sobic.004G037200.1	7	T	-	PLN03012,SQHop_cyclase_C superfamily	NA
Sobic.004G037200.1	8	E	-	PLN03012,SQHop_cyclase_C superfamily	NA
Sobic.004G037200.1	9	G	-	PLN03012,SQHop_cyclase_C superfamily	NA
Sobic.004G037200.1	10	G	-	PLN03012,SQHop_cyclase_C superfamily	NA
Sobic.004G037200.1	11	G	-	PLN03012,SQHop_cyclase_C superfamily	NA
Sobic.004G037200.1	12	D	-	PLN03012,SQHop_cyclase_C superfamily	NA
Sobic.004G037200.1	13	P	-	PLN03012,SQHop_cyclase_C superfamily	NA
Sobic.004G037200.1	14	W	-	PLN03012,SQHop_cyclase_C superfamily	NA
Sobic.004G037200.1	15	L	-	PLN03012,SQHop_cyclase_C superfamily	NA
Sobic.004G037200.1	16	R	-	PLN03012,SQHop_cyclase_C superfamily	NA
Sobic.004G037200.1	17	T	-	PLN03012,SQHop_cyclase_C superfamily	NA
Sobic.004G037200.1	18	K	-	PLN03012,SQHop_cyclase_C superfamily	NA
Sobic.004G037200.1	19	N	-	PLN03012,SQHop_cyclase_C superfamily	NA
Sobic.004G037200.1	20	A	-	PLN03012,SQHop_cyclase_C superfamily	NA
Sobic.004G037200.1	21	H	-	PLN03012,SQHop_cyclase_C superfamily	NA
Sobic.004G037200.1	22	V	-	PLN03012,SQHop_cyclase_C superfamily	NA
Sobic.004G037200.1	23	G	-	PLN03012,SQHop_cyclase_C superfamily	NA
Sobic.004G037200.1	24	R	-	PLN03012,SQHop_cyclase_C superfamily	NA
Sobic.004G037200.1	25	Q	-	PLN03012,SQHop_cyclase_C superfamily	NA
Sobic.004G037200.1	26	V	-	PLN03012,SQHop_cyclase_C superfamily	NA
Sobic.004G037200.1	27	W	-	PLN03012,SQHop_cyclase_C superfamily	NA
Sobic.004G037200.1	28	E	-	PLN03012,SQHop_cyclase_C superfamily	NA
Sobic.004G037200.1	29	F	-	PLN03012,SQHop_cyclase_C superfamily	NA
Sobic.004G037200.1	30	D	-	PLN03012,SQHop_cyclase_C superfamily	NA
Sobic.004G037200.1	31	A	-	PLN03012,SQHop_cyclase_C superfamily	NA
Sobic.004G037200.1	32	A	-	PLN03012,SQHop_cyclase_C superfamily	NA
Sobic.004G037200.1	33	A	-	PLN03012,SQHop_cyclase_C superfamily	NA
Sobic.004G037200.1	34	D	-	PLN03012,SQHop_cyclase_C superfamily	NA
Sobic.004G037200.1	35	P	-	PLN03012,SQHop_cyclase_C superfamily	NA
Sobic.004G037200.1	36	D	-	PLN03012,SQHop_cyclase_C superfamily	NA
Sobic.004G037200.1	37	P	-	PLN03012,SQHop_cyclase_C superfamily	NA
Sobic.004G037200.1	38	A	-	PLN03012,SQHop_cyclase_C superfamily	NA
Sobic.004G037200.1	39	V	-	PLN03012,SQHop_cyclase_C superfamily	NA
Sobic.004G037200.1	40	D	-	PLN03012,SQHop_cyclase_C superfamily	NA
Sobic.004G037200.1	41	A	-	PLN03012,SQHop_cyclase_C superfamily	NA
Sobic.004G037200.1	42	A	-	PLN03012,SQHop_cyclase_C superfamily	NA
Sobic.004G037200.1	43	R	-	PLN03012,SQHop_cyclase_C superfamily	NA
Sobic.004G037200.1	44	R	-	PLN03012,SQHop_cyclase_C superfamily	NA
Sobic.004G037200.1	45	A	-	PLN03012,SQHop_cyclase_C superfamily	NA
Sobic.004G037200.1	46	F	-	PLN03012,SQHop_cyclase_C superfamily	NA
Sobic.004G037200.1	47	V	-	PLN03012,SQHop_cyclase_C superfamily	NA
Sobic.004G037200.1	48	D	-	PLN03012,SQHop_cyclase_C superfamily	NA
Sobic.004G037200.1	49	T	-	PLN03012,SQHop_cyclase_C superfamily	NA
Sobic.004G037200.1	50	R	-	PLN03012,SQHop_cyclase_C superfamily	NA
Sobic.004G037200.1	51	R	-	PLN03012,SQHop_cyclase_C superfamily	NA
Sobic.004G037200.1	52	Q	-	PLN03012,SQHop_cyclase_C superfamily	NA
Sobic.004G037200.1	53	L	-	PLN03012,SQHop_cyclase_C superfamily	NA
Sobic.004G037200.1	54	K	-	PLN03012,SQHop_cyclase_C superfamily	NA
Sobic.004G037200.1	55	H	-	PLN03012,SQHop_cyclase_C superfamily	NA
Sobic.004G037200.1	56	S	-	PLN03012,SQHop_cyclase_C superfamily	NA
Sobic.004G037200.1	57	A	-	PLN03012,SQHop_cyclase_C superfamily	NA
Sobic.004G037200.1	58	D	-	PLN03012,SQHop_cyclase_C superfamily	NA
Sobic.004G037200.1	59	L	-	PLN03012,SQHop_cyclase_C superfamily	NA
Sobic.004G037200.1	60	L	-	PLN03012,SQHop_cyclase_C superfamily	NA
Sobic.004G037200.1	61	M	-	PLN03012,SQHop_cyclase_C superfamily	NA
Sobic.004G037200.1	62	R	-	PLN03012,SQHop_cyclase_C superfamily	NA
Sobic.004G037200.1	63	I	-	PLN03012,SQHop_cyclase_C superfamily	NA
Sobic.004G037200.1	64	Q	-	PLN03012,SQHop_cyclase_C superfamily	NA
Sobic.004G037200.1	65	F	-	PLN03012,SQHop_cyclase_C superfamily	NA
Sobic.004G037200.1	66	A	-	PLN03012,SQHop_cyclase_C superfamily	NA
Sobic.004G037200.1	67	K	-	PLN03012,SQHop_cyclase_C superfamily	NA
Sobic.004G037200.1	68	E	-	PLN03012,SQHop_cyclase_C superfamily	NA
Sobic.004G037200.1	69	N	-	PLN03012,SQHop_cyclase_C superfamily	NA
Sobic.004G037200.1	70	P	-	PLN03012,SQHop_cyclase_C superfamily	NA
Sobic.004G037200.1	71	L	-	PLN03012,SQHop_cyclase_C superfamily	NA
Sobic.004G037200.1	72	E	-	PLN03012,SQHop_cyclase_C superfamily	NA
Sobic.004G037200.1	73	L	-	PLN03012,SQHop_cyclase_C superfamily	NA
Sobic.004G037200.1	74	D	-	PLN03012,SQHop_cyclase_C superfamily	NA
Sobic.004G037200.1	75	L	-	PLN03012,SQHop_cyclase_C superfamily	NA
Sobic.004G037200.1	76	P	-	PLN03012,SQHop_cyclase_C superfamily	NA
Sobic.004G037200.1	77	A	-	PLN03012,SQHop_cyclase_C superfamily	NA
Sobic.004G037200.1	78	I	-	PLN03012,SQHop_cyclase_C superfamily	NA
Sobic.004G037200.1	79	K	-	PLN03012,SQHop_cyclase_C superfamily	NA
Sobic.004G037200.1	80	L	-	PLN03012,SQHop_cyclase_C superfamily	NA
Sobic.004G037200.1	81	G	-	PLN03012,SQHop_cyclase_C superfamily	NA
Sobic.004G037200.1	82	E	-	PLN03012,SQHop_cyclase_C superfamily	NA
Sobic.004G037200.1	83	H	-	PLN03012,SQHop_cyclase_C superfamily	NA
Sobic.004G037200.1	84	E	-	PLN03012,SQHop_cyclase_C superfamily	NA
Sobic.004G037200.1	85	D	-	PLN03012,SQHop_cyclase_C superfamily	NA
Sobic.004G037200.1	86	V	-	PLN03012,SQHop_cyclase_C superfamily	NA
Sobic.004G037200.1	87	T	-	PLN03012,SQHop_cyclase_C superfamily	NA
Sobic.004G037200.1	88	E	-	PLN03012,SQHop_cyclase_C superfamily	NA
Sobic.004G037200.1	89	E	-	PLN03012,SQHop_cyclase_C superfamily	NA
Sobic.004G037200.1	90	A	-	PLN03012,SQHop_cyclase_C superfamily	NA
Sobic.004G037200.1	91	V	-	PLN03012,SQHop_cyclase_C superfamily	NA
Sobic.004G037200.1	92	S	-	PLN03012,SQHop_cyclase_C superfamily	NA
Sobic.004G037200.1	93	T	-	PLN03012,SQHop_cyclase_C superfamily	NA
Sobic.004G037200.1	94	T	-	PLN03012,SQHop_cyclase_C superfamily,squalene_cyclas	NA
Sobic.004G037200.1	95	L	-	PLN03012,SQHop_cyclase_C superfamily,SQCY_1,ISOPREN_C2_like superfamily,squalene_cyclas	NA
Sobic.004G037200.1	96	K	-	PLN03012,SQHop_cyclase_C superfamily,SQCY_1,ISOPREN_C2_like superfamily,squalene_cyclas	NA
Sobic.004G037200.1	97	R	-	PLN03012,SQHop_cyclase_C superfamily,SQCY_1,ISOPREN_C2_like superfamily,squalene_cyclas	NA
Sobic.004G037200.1	98	A	-	PLN03012,SQHop_cyclase_C superfamily,SQCY_1,ISOPREN_C2_like superfamily,squalene_cyclas	NA
Sobic.004G037200.1	99	I	-	PLN03012,SQHop_cyclase_C superfamily,SQCY_1,ISOPREN_C2_like superfamily,squalene_cyclas	NA
Sobic.004G037200.1	100	S	-	PLN03012,SQHop_cyclase_C superfamily,SQCY_1,ISOPREN_C2_like superfamily,squalene_cyclas	NA
Sobic.004G037200.1	101	R	-	PLN03012,SQHop_cyclase_C superfamily,SQCY_1,ISOPREN_C2_like superfamily,squalene_cyclas	NA
Sobic.004G037200.1	102	F	-	PLN03012,SQHop_cyclase_C superfamily,SQCY_1,ISOPREN_C2_like superfamily,squalene_cyclas	NA
Sobic.004G037200.1	103	S	-	PLN03012,SQHop_cyclase_C superfamily,SQCY_1,ISOPREN_C2_like superfamily,squalene_cyclas	NA
Sobic.004G037200.1	104	T	-	PLN03012,SQHop_cyclase_C superfamily,SQCY_1,ISOPREN_C2_like superfamily,squalene_cyclas	NA
Sobic.004G037200.1	105	L	-	PLN03012,SQHop_cyclase_C superfamily,SQCY_1,ISOPREN_C2_like superfamily,squalene_cyclas	NA
Sobic.004G037200.1	106	Q	-	PLN03012,SQHop_cyclase_C superfamily,SQCY_1,ISOPREN_C2_like superfamily,squalene_cyclas	NA
Sobic.004G037200.1	107	A	-	PLN03012,SQHop_cyclase_C superfamily,SQCY_1,ISOPREN_C2_like superfamily,squalene_cyclas	NA
Sobic.004G037200.1	108	H	-	PLN03012,SQHop_cyclase_C superfamily,SQCY_1,ISOPREN_C2_like superfamily,squalene_cyclas	NA
Sobic.004G037200.1	109	D	-	PLN03012,SQHop_cyclase_C superfamily,SQCY_1,ISOPREN_C2_like superfamily,squalene_cyclas	NA
Sobic.004G037200.1	110	G	-	PLN03012,SQHop_cyclase_C superfamily,SQCY_1,ISOPREN_C2_like superfamily,squalene_cyclas	NA
Sobic.004G037200.1	111	H	-	PLN03012,SQHop_cyclase_C superfamily,SQCY_1,ISOPREN_C2_like superfamily,squalene_cyclas	NA
Sobic.004G037200.1	112	W	-	PLN03012,SQHop_cyclase_C superfamily,SQCY_1,ISOPREN_C2_like superfamily,squalene_cyclas	NA
Sobic.004G037200.1	113	P	-	PLN03012,SQHop_cyclase_C superfamily,SQCY_1,ISOPREN_C2_like superfamily,squalene_cyclas	NA
Sobic.004G037200.1	114	G	-	PLN03012,SQHop_cyclase_C superfamily,SQCY_1,ISOPREN_C2_like superfamily,squalene_cyclas	NA
Sobic.004G037200.1	115	D	-	PLN03012,SQHop_cyclase_C superfamily,SQCY_1,ISOPREN_C2_like superfamily,squalene_cyclas	NA
Sobic.004G037200.1	116	Y	-	PLN03012,SQHop_cyclase_C superfamily,SQCY_1,ISOPREN_C2_like superfamily,squalene_cyclas	NA
Sobic.004G037200.1	117	G	-	PLN03012,SQHop_cyclase_C superfamily,SQCY_1,ISOPREN_C2_like superfamily,squalene_cyclas	Active site cavity
Sobic.004G037200.1	118	G	-	PLN03012,SQHop_cyclase_C superfamily,SQCY_1,ISOPREN_C2_like superfamily,squalene_cyclas	NA
Sobic.004G037200.1	119	P	-	PLN03012,SQHop_cyclase_C superfamily,SQCY_1,ISOPREN_C2_like superfamily,squalene_cyclas	NA
Sobic.003G124200.1	167	I	V	PhzC-PhzF,PhzC-PhzF superfamily,YHI9,PhzF_family,PRK10281,DAP_epimerase superfamily	NA
Sobic.003G104350.1	268	N	-	PLN02657,YbjT superfamily	NA
Sobic.003G104350.1	269	Q	-	PLN02657,YbjT superfamily	NA
Sobic.003G104350.1	270	E	-	PLN02657,YbjT superfamily	NA
Sobic.003G104350.1	553	L	P	PCBER_SDR_a,SDR superfamily	NA
Sobic.009G045000.1	300	V	I	PEP_TPR_lipo,TPR_11 superfamily,TPR	NA
Sobic.009G258100.1	127	S	N	COG5594,RSN1_TM,RSN1_TM superfamily	NA
Sobic.002G409900.1	342	G	V	obgE,HflX superfamily,Obg_CgtA,Obg,GTP1_OBG,GTP1_OBG superfamily	NA
Sobic.002G409900.1	400	M	I	obgE,HflX superfamily,Obg_CgtA,Obg,GTP1_OBG,GTP1_OBG superfamily	NA
Sobic.002G409900.1	589	V	L	obgE,HflX superfamily,Obg_CgtA,Obg,P-loop_NTPase superfamily	NA
Sobic.002G409900.1	595	E	K	obgE,HflX superfamily,Obg_CgtA,Obg,P-loop_NTPase superfamily	NA
Sobic.002G409900.1	607	M	T	obgE,HflX superfamily,Obg_CgtA,Obg,P-loop_NTPase superfamily	NA
Sobic.002G409900.1	654	E	D	obgE,HflX superfamily	NA
Sobic.005G093800.1	4	-	G	RX-CC_like,RX-CC_like superfamily	NA
Sobic.005G093800.1	5	-	S	RX-CC_like,RX-CC_like superfamily	NA
Sobic.005G093800.1	6	-	I	RX-CC_like,RX-CC_like superfamily	NA
Sobic.005G093800.1	7	-	P	RX-CC_like,RX-CC_like superfamily	NA
Sobic.005G093800.1	8	-	S	RX-CC_like,RX-CC_like superfamily	NA
Sobic.005G093800.1	9	-	F	RX-CC_like,RX-CC_like superfamily	NA
Sobic.005G093800.1	10	-	R	RX-CC_like,RX-CC_like superfamily	NA
Sobic.005G093800.1	11	-	S	RX-CC_like,RX-CC_like superfamily	NA
Sobic.005G093800.1	12	-	R	RX-CC_like,RX-CC_like superfamily	NA
Sobic.005G093800.1	13	-	S	RX-CC_like,RX-CC_like superfamily	NA
Sobic.005G093800.1	14	-	G	RX-CC_like,RX-CC_like superfamily	NA
Sobic.005G093800.1	15	-	L	RX-CC_like,RX-CC_like superfamily	NA
Sobic.005G093800.1	16	-	R	RX-CC_like,RX-CC_like superfamily	NA
Sobic.005G093800.1	17	-	F	RX-CC_like,RX-CC_like superfamily	NA
Sobic.005G093800.1	18	-	Q	RX-CC_like,RX-CC_like superfamily	NA
Sobic.005G093800.1	19	-	Q	RX-CC_like,RX-CC_like superfamily	NA
Sobic.005G093800.1	20	-	H	RX-CC_like,RX-CC_like superfamily	NA
Sobic.005G093800.1	21	-	K	RX-CC_like,RX-CC_like superfamily	NA
Sobic.005G093800.1	22	-	L	RX-CC_like,RX-CC_like superfamily	NA
Sobic.005G093800.1	451	-	F	NB-ARC,NB-ARC superfamily	NA
Sobic.003G021900.1	59	L	I	p450,p450 superfamily,CypX,PLN02302	NA
Sobic.003G021900.1	88	A	T	p450,p450 superfamily,CypX,PLN02302	NA
Sobic.003G203500.1	65	K	N	PLN02766,ALDH-SF superfamily,ALDH_F2BC,Aldedh,AdhE,BADH	NA
Sobic.003G203500.1	359	M	I	PLN02766,ALDH-SF superfamily,ALDH_F2BC,Aldedh,AdhE,BADH	NA
Sobic.007G194800.2	11	Y	L	PLN02872,PLN02872 superfamily	NA
Sobic.007G194800.2	12	L	F	PLN02872,PLN02872 superfamily	NA
Sobic.007G194800.2	13	C	L	PLN02872,PLN02872 superfamily	NA
Sobic.007G194800.2	14	-	S	PLN02872,PLN02872 superfamily	NA
Sobic.007G194800.2	15	-	S	PLN02872,PLN02872 superfamily	NA
Sobic.007G194800.2	16	-	S	PLN02872,PLN02872 superfamily	NA
Sobic.007G194800.2	17	-	T	PLN02872,PLN02872 superfamily	NA
Sobic.007G194800.2	18	-	T	PLN02872,PLN02872 superfamily	NA
Sobic.007G194800.2	19	-	L	PLN02872,PLN02872 superfamily	NA
Sobic.007G194800.2	20	-	R	PLN02872,PLN02872 superfamily	NA
Sobic.007G194800.2	21	-	L	PLN02872,PLN02872 superfamily	NA
Sobic.007G194800.2	22	-	A	PLN02872,PLN02872 superfamily	NA
Sobic.007G194800.2	23	-	V	PLN02872,PLN02872 superfamily	NA
Sobic.007G194800.2	24	-	V	PLN02872,PLN02872 superfamily	NA
Sobic.007G194800.2	25	-	V	PLN02872,PLN02872 superfamily	NA
Sobic.007G194800.2	26	-	G	PLN02872,PLN02872 superfamily	NA
Sobic.007G194800.2	27	-	A	PLN02872,PLN02872 superfamily	NA
Sobic.007G194800.2	28	-	R	PLN02872,PLN02872 superfamily	NA
Sobic.007G194800.2	29	-	V	PLN02872,PLN02872 superfamily	NA
Sobic.007G194800.2	30	-	I	PLN02872,PLN02872 superfamily	NA
Sobic.007G194800.2	31	-	H	PLN02872,PLN02872 superfamily	NA
Sobic.007G194800.2	32	-	Q	PLN02872,PLN02872 superfamily	NA
Sobic.007G194800.2	33	-	P	PLN02872,PLN02872 superfamily	NA
Sobic.007G194800.2	34	-	Y	PLN02872,PLN02872 superfamily	NA
Sobic.007G194800.2	35	-	G	PLN02872,PLN02872 superfamily	NA
Sobic.007G194800.2	36	-	G	PLN02872,PLN02872 superfamily	NA
Sobic.007G194800.2	37	-	G	PLN02872,PLN02872 superfamily	NA
Sobic.007G194800.2	38	-	G	PLN02872,PLN02872 superfamily	NA
Sobic.007G194800.2	39	-	G	PLN02872,PLN02872 superfamily	NA
Sobic.007G194800.2	40	-	G	PLN02872,PLN02872 superfamily	NA
Sobic.007G194800.2	41	-	G	PLN02872,PLN02872 superfamily	NA
Sobic.007G194800.2	42	-	P	PLN02872,PLN02872 superfamily	NA
Sobic.007G194800.2	43	-	C	PLN02872,PLN02872 superfamily	NA
Sobic.007G194800.2	44	-	A	PLN02872,PLN02872 superfamily	NA
Sobic.007G194800.2	45	-	L	PLN02872,PLN02872 superfamily	NA
Sobic.007G194800.2	46	-	A	PLN02872,PLN02872 superfamily	NA
Sobic.007G194800.2	47	-	V	PLN02872,PLN02872 superfamily	NA
Sobic.007G194800.2	48	-	A	PLN02872,PLN02872 superfamily	NA
Sobic.007G194800.2	49	-	P	PLN02872,PLN02872 superfamily	NA
Sobic.007G194800.2	50	-	L	PLN02872,PLN02872 superfamily	NA
Sobic.007G194800.2	51	-	G	PLN02872,PLN02872 superfamily	NA
Sobic.007G194800.2	52	-	Y	PLN02872,PLN02872 superfamily	NA
Sobic.007G194800.2	53	-	P	PLN02872,PLN02872 superfamily	NA
Sobic.007G194800.2	54	-	C	PLN02872,PLN02872 superfamily,Abhydrolase_1,Abhydrolase_1 superfamily	NA
Sobic.007G194800.2	55	-	E	PLN02872,PLN02872 superfamily,Abhydrolase_1,Abhydrolase_1 superfamily	NA
Sobic.007G194800.2	56	-	E	PLN02872,PLN02872 superfamily,Abhydrolase_1,Abhydrolase_1 superfamily	NA
Sobic.007G194800.2	57	M	H	PLN02872,PLN02872 superfamily,Abhydrolase_1,Abhydrolase_1 superfamily	NA
Sobic.007G194800.2	86	G	-	PLN02872,PLN02872 superfamily,Abhydrolase_1,Abhydrolase_1 superfamily,PhaC,PhaC superfamily	NA
Sobic.007G194800.2	87	G	-	PLN02872,PLN02872 superfamily,Abhydrolase_1,Abhydrolase_1 superfamily,PhaC,PhaC superfamily	NA
Sobic.002G329500.1	42	E	A	PLN02801,AmyAc_family superfamily,Glyco_hydro_14	NA
Sobic.002G329500.1	220	A	T	PLN02801,AmyAc_family superfamily,Glyco_hydro_14	NA
Sobic.002G329500.1	403	K	R	PLN02801,AmyAc_family superfamily,Glyco_hydro_14	NA
Sobic.002G329500.1	476	K	E	PLN02801,AmyAc_family superfamily	NA
Sobic.003G040600.1	17	K	R	PLN03191,EEP superfamily	NA
Sobic.004G310100.1	200	V	I	PLN02704,PcbC superfamily,PcbC,2OG-FeII_Oxy,2OG-FeII_Oxy superfamily	NA
Sobic.005G183900.1	83	I	M	PLN03140,AAA superfamily	NA
Sobic.005G183900.1	105	M	I	PLN03140,AAA superfamily,3a01205,PRK10535 superfamily	NA
Sobic.005G183900.1	106	E	Q	PLN03140,AAA superfamily,3a01205,PRK10535 superfamily	NA
Sobic.005G183900.1	113	P	T	PLN03140,AAA superfamily,3a01205,PRK10535 superfamily	NA
Sobic.005G183900.1	179	S	C	PLN03140,AAA superfamily,3a01205,PRK10535 superfamily	NA
Sobic.005G183900.1	285	A	-	PLN03140,AAA superfamily,3a01205,PRK10535 superfamily	NA
Sobic.005G183900.1	286	I	-	PLN03140,AAA superfamily,3a01205,PRK10535 superfamily	NA
Sobic.005G183900.1	287	S	-	PLN03140,AAA superfamily,3a01205,PRK10535 superfamily	NA
Sobic.005G183900.1	288	Q	-	PLN03140,AAA superfamily,3a01205,PRK10535 superfamily	NA
Sobic.005G183900.1	289	E	-	PLN03140,AAA superfamily,3a01205,PRK10535 superfamily	NA
Sobic.005G183900.1	290	G	-	PLN03140,AAA superfamily,3a01205,PRK10535 superfamily	NA
Sobic.005G183900.1	291	Q	-	PLN03140,AAA superfamily,3a01205,PRK10535 superfamily	NA
Sobic.005G183900.1	292	E	-	PLN03140,AAA superfamily,3a01205,PRK10535 superfamily	NA
Sobic.005G183900.1	293	N	-	PLN03140,AAA superfamily,3a01205,PRK10535 superfamily	NA
Sobic.005G183900.1	294	L	-	PLN03140,AAA superfamily,3a01205,PRK10535 superfamily	NA
Sobic.005G183900.1	295	I	-	PLN03140,AAA superfamily,3a01205,PRK10535 superfamily	NA
Sobic.005G183900.1	296	T	-	PLN03140,AAA superfamily,3a01205,PRK10535 superfamily	NA
Sobic.005G183900.1	297	D	-	PLN03140,AAA superfamily,3a01205,PRK10535 superfamily	NA
Sobic.005G183900.1	298	Y	-	PLN03140,AAA superfamily,3a01205,PRK10535 superfamily	NA
Sobic.005G183900.1	299	I	-	PLN03140,AAA superfamily,3a01205,PRK10535 superfamily	NA
Sobic.005G183900.1	300	L	-	PLN03140,AAA superfamily,3a01205,PRK10535 superfamily	NA
Sobic.005G183900.1	301	K	-	PLN03140,AAA superfamily,3a01205,PRK10535 superfamily	NA
Sobic.005G183900.1	547	D	N	PLN03140,AAA superfamily,3a01205,PRK10535 superfamily,ABC2_membrane,ABC2_membrane superfamily	NA
Sobic.005G183900.1	667	F	L	PLN03140,AAA superfamily,3a01205,PRK10535 superfamily,ABC2_membrane,ABC2_membrane superfamily	NA
Sobic.005G183900.1	773	-	R	PLN03140,AAA superfamily,3a01205,PRK10535 superfamily	NA
Sobic.005G183900.1	774	-	E	PLN03140,AAA superfamily,3a01205,PRK10535 superfamily	NA
Sobic.005G183900.1	775	-	T	PLN03140,AAA superfamily,3a01205,PRK10535 superfamily	NA
Sobic.005G183900.1	776	-	K	PLN03140,AAA superfamily,3a01205,PRK10535 superfamily	NA
Sobic.005G183900.1	777	-	P	PLN03140,AAA superfamily,3a01205,PRK10535 superfamily	NA
Sobic.005G183900.1	778	-	S	PLN03140,AAA superfamily,3a01205,PRK10535 superfamily	NA
Sobic.005G183900.1	779	-	Y	PLN03140,AAA superfamily,3a01205,PRK10535 superfamily	NA
Sobic.005G183900.1	780	-	V	PLN03140,AAA superfamily,3a01205,PRK10535 superfamily	NA
Sobic.005G183900.1	781	-	C	PLN03140,AAA superfamily,3a01205,PRK10535 superfamily	NA
Sobic.005G183900.1	782	-	P	PLN03140,AAA superfamily,3a01205,PRK10535 superfamily	NA
Sobic.005G183900.1	783	-	F	PLN03140,AAA superfamily,3a01205,PRK10535 superfamily	NA
Sobic.005G183900.1	784	-	E	PLN03140,AAA superfamily,3a01205,PRK10535 superfamily	NA
Sobic.005G183900.1	785	-	K	PLN03140,AAA superfamily,3a01205,PRK10535 superfamily	NA
Sobic.005G183900.1	786	-	N	PLN03140,AAA superfamily,3a01205,PRK10535 superfamily	NA
Sobic.005G183900.1	787	-	P	PLN03140,AAA superfamily,3a01205,PRK10535 superfamily	NA
Sobic.005G183900.1	788	-	S	PLN03140,AAA superfamily,3a01205,PRK10535 superfamily	NA
Sobic.005G183900.1	789	-	Y	PLN03140,AAA superfamily,3a01205,PRK10535 superfamily	NA
Sobic.005G183900.1	790	-	V	PLN03140,AAA superfamily,3a01205,PRK10535 superfamily	NA
Sobic.005G183900.1	791	-	W	PLN03140,AAA superfamily,3a01205,PRK10535 superfamily	NA
Sobic.005G183900.1	792	-	H	PLN03140,AAA superfamily,3a01205,PRK10535 superfamily	NA
Sobic.005G183900.1	793	-	D	PLN03140,AAA superfamily,3a01205,PRK10535 superfamily	NA
Sobic.005G183900.1	794	-	V	PLN03140,AAA superfamily,3a01205,PRK10535 superfamily	NA
Sobic.005G183900.1	795	-	I	PLN03140,AAA superfamily,3a01205,PRK10535 superfamily	NA
Sobic.005G183900.1	796	-	P	PLN03140,AAA superfamily,3a01205,PRK10535 superfamily	NA
Sobic.005G183900.1	797	-	V	PLN03140,AAA superfamily,3a01205,PRK10535 superfamily	NA
Sobic.005G183900.1	798	-	I	PLN03140,AAA superfamily,3a01205,PRK10535 superfamily	NA
Sobic.005G183900.1	799	-	T	PLN03140,AAA superfamily,3a01205,PRK10535 superfamily	NA
Sobic.005G183900.1	800	P	A	PLN03140,AAA superfamily,3a01205,PRK10535 superfamily	NA
Sobic.005G183900.1	856	V	I	PLN03140,AAA superfamily,3a01205,PRK10535 superfamily,ABCG_PDR_domain2,ABC_ATPase superfamily	NA
Sobic.005G183900.1	1119	K	M	PLN03140,AAA superfamily,3a01205,PRK10535 superfamily	NA
Sobic.005G183900.1	1142	V	I	PLN03140,AAA superfamily,3a01205,PRK10535 superfamily	NA
Sobic.005G057700.1	836	T	A	PLN00113,PLN00113 superfamily,STKc_IRAK,PKc_like superfamily,S_TKc,Pkinase superfamily,Pkinase,SPS1,TOMM_kin_cyc	NA
Sobic.005G057700.1	842	A	V	PLN00113,PLN00113 superfamily,STKc_IRAK,PKc_like superfamily,S_TKc,Pkinase superfamily,Pkinase,SPS1,TOMM_kin_cyc	NA
Sobic.005G057700.1	944	D	N	PLN00113,PLN00113 superfamily,STKc_IRAK,PKc_like superfamily,S_TKc,Pkinase superfamily,Pkinase,SPS1	NA
Sobic.001G012400.1	118	G	E	PLN02448,Glycosyltransferase_GTB_type superfamily,GT1_Gtf_like,YjiC,MGT	NA
Sobic.001G012400.1	182	A	T	PLN02448,Glycosyltransferase_GTB_type superfamily,GT1_Gtf_like,YjiC,MGT	NA
Sobic.001G012400.1	274	A	D	PLN02448,Glycosyltransferase_GTB_type superfamily,GT1_Gtf_like,YjiC,MGT	NA
Sobic.001G012400.1	287	Q	K	PLN02448,Glycosyltransferase_GTB_type superfamily,GT1_Gtf_like,YjiC,MGT	NA
Sobic.001G012000.1	299	P	A	PLN02687,p450 superfamily,p450,CypX,P450_cycloAA_1	NA
Sobic.001G012000.1	367	M	I	PLN02687,p450 superfamily,p450,CypX,P450_cycloAA_1	NA
Sobic.001G012000.1	385	-	D	PLN02687,p450 superfamily,p450,CypX,P450_cycloAA_1	NA
Sobic.001G012300.1	211	A	V	PLN02971,p450 superfamily,p450,CypX	NA
Sobic.003G424400.1	240	R	H	PLN03200,PLN03200 superfamily	NA
Sobic.003G424400.1	423	A	T	Syo1_like,Syo1_like superfamily,PLN03200,PLN03200 superfamily,SRP1,Arm_3 superfamily
Sobic.003G424400.1	434	K	Q	Syo1_like,Syo1_like superfamily,PLN03200,PLN03200 superfamily,SRP1,Arm_3 superfamily
Sobic.003G424400.1	595	S	T	SRP1,Arm_3 superfamily	NA
Sobic.003G424400.1	607	L	R	SRP1,Arm_3 superfamily	NA
Sobic.003G424400.1	611	L	S	SRP1,Arm_3 superfamily	NA
Sobic.003G424400.1	617	V	G	SRP1,Arm_3 superfamily	NA
Sobic.005G033801.1	311	M	T	PLN00414,Glycosyltransferase_GTB_type superfamily,GT1_Gtf_like,MGT,UDPGT superfamily,UDPGT,YjiC	NA
Sobic.006G128200.1	399	E	D	SPS1	NA
Sobic.004G297600.1	64	-	S	PLN02802,Abhydrolase superfamily	NA
Sobic.004G297600.1	65	-	S	PLN02802,Abhydrolase superfamily	NA
Sobic.004G297600.1	66	-	A	PLN02802,Abhydrolase superfamily	NA
Sobic.004G297600.1	345	D	E	PLN02802,Abhydrolase superfamily,Lipase_3,Lipase superfamily	NA
Sobic.002G397600.1	105	L	P	PP2Cc,PP2Cc superfamily,PP2C,PTC1	NA
Sobic.002G407300.3	91	E	D	secoisolariciresinol-DH_like_SDR_c,SDR superfamily,PLN02253,FabI superfamily,adh_short_C2,NADB_Rossmann superfamily,SDR_subfam_1,FabG,adh_short superfamily,PKS_KR	NA
Sobic.005G087400.4	205	N	T	CBM_4_9,CBM_4_9 superfamily	NA
Sobic.005G087400.4	225	N	D	CBM_4_9,CBM_4_9 superfamily	NA
Sobic.005G087400.4	282	N	S	AbfA	NA
Sobic.005G087400.4	285	V	M	AbfA	NA
Sobic.005G087400.4	404	K	Q	AbfA	NA
Sobic.005G087400.4	639	D	H	Alpha-L-AF_C,Alpha-L-AF_C superfamily,AbfA	NA
Sobic.005G087400.4	680	Q	L	Alpha-L-AF_C,Alpha-L-AF_C superfamily,AbfA	NA
Sobic.005G165500.1	102	G	A	Inhibitor_I9,Inhibitor_I9 superfamily	NA
Sobic.005G165500.1	139	S	-	Peptidases_S8_3,Peptidases_S8_S53 superfamily	NA
Sobic.005G165500.1	272	T	A	Peptidases_S8_3,Peptidases_S8_S53 superfamily,Peptidase_S8,Peptidase_S8 superfamily	NA
Sobic.005G165500.1	422	G	A	Peptidases_S8_3,Peptidases_S8_S53 superfamily,Peptidase_S8,Peptidase_S8 superfamily	NA
Sobic.005G165500.1	454	I	V	Peptidases_S8_3,Peptidases_S8_S53 superfamily,Peptidase_S8,Peptidase_S8 superfamily	NA
Sobic.005G165500.1	501	Q	E	Peptidases_S8_3,Peptidases_S8_S53 superfamily,Peptidase_S8,Peptidase_S8 superfamily,T7SS_mycosin,Peptidases_S53_like,AprE	NA
Sobic.005G165500.1	504	S	F	Peptidases_S8_3,Peptidases_S8_S53 superfamily,Peptidase_S8,Peptidase_S8 superfamily,T7SS_mycosin,Peptidases_S53_like,AprE	NA
Sobic.005G165500.1	580	V	Q	Peptidases_S53_like,Peptidases_S8_S53 superfamily	NA
Sobic.004G112100.1	212	E	D	GlpG,PTZ00101	NA
Sobic.003G400200.1	66	E	D	PDDEXK_6,PDDEXK_6 superfamily	NA
Sobic.003G400200.1	106	T	A	PDDEXK_6,PDDEXK_6 superfamily	NA
Sobic.003G400200.1	120	S	A	PDDEXK_6,PDDEXK_6 superfamily	NA
Sobic.003G400200.1	125	V	M	PDDEXK_6,PDDEXK_6 superfamily,A_thal_3542	NA
Sobic.002G407500.1	155	A	G	secoisolariciresinol-DH_like_SDR_c,SDR superfamily,PLN02253,FabI superfamily,adh_short_C2,NADB_Rossmann superfamily,SDR_subfam_1,FabG,adh_short superfamily	NA
Sobic.001G538100.1	162	H	R	mRING-C3HGC3_RFWD3,RING_Ubox superfamily,zf-RING_2,RING,COG5540,zf-rbx1 superfamily	NA
Sobic.002G220600.1	501	L	M	K_trans,K_trans superfamily,PLN00150,kup,Kup	NA
Sobic.002G220600.1	615	N	D	PLN00150,kup	NA
Sobic.002G220600.1	635	-	T	PLN00150,kup	NA
Sobic.002G220600.1	666	D	E	PLN00150,kup	NA
Sobic.002G220600.1	704	G	A	PLN00150,kup	NA
Sobic.002G220600.1	705	-	C	PLN00150,kup	NA
Sobic.002G220600.1	706	-	C	PLN00150,kup	NA
Sobic.002G220600.1	707	-	T	PLN00150,kup	NA
Sobic.002G220600.1	708	-	R	PLN00150,kup	NA
Sobic.003G109900.2	230	L	F	TRAUB,TRAUB superfamily	NA
Sobic.003G109900.2	273	V	L	TRAUB,TRAUB superfamily	NA
Sobic.009G009000.1	76	F	-	Terpene_cyclase_plant_C1,Isoprenoid_Biosyn_C1 superfamily	NA
Sobic.009G009000.1	77	H	-	Terpene_cyclase_plant_C1,Isoprenoid_Biosyn_C1 superfamily	NA
Sobic.009G009000.1	78	P	-	Terpene_cyclase_plant_C1,Isoprenoid_Biosyn_C1 superfamily	NA
Sobic.009G009000.1	79	S	-	Terpene_cyclase_plant_C1,Isoprenoid_Biosyn_C1 superfamily	NA
Sobic.009G009000.1	80	I	-	Terpene_cyclase_plant_C1,Isoprenoid_Biosyn_C1 superfamily	NA
Sobic.009G009000.1	81	W	-	Terpene_cyclase_plant_C1,Isoprenoid_Biosyn_C1 superfamily	NA
Sobic.009G009000.1	82	G	-	Terpene_cyclase_plant_C1,Isoprenoid_Biosyn_C1 superfamily	NA
Sobic.009G009000.1	83	D	-	Terpene_cyclase_plant_C1,Isoprenoid_Biosyn_C1 superfamily	NA
Sobic.009G009000.1	84	S	-	Terpene_cyclase_plant_C1,Isoprenoid_Biosyn_C1 superfamily	NA
Sobic.009G009000.1	85	F	-	Terpene_cyclase_plant_C1,Isoprenoid_Biosyn_C1 superfamily	NA
Sobic.009G009000.1	86	L	-	Terpene_cyclase_plant_C1,Isoprenoid_Biosyn_C1 superfamily	NA
Sobic.009G009000.1	87	G	-	Terpene_cyclase_plant_C1,Isoprenoid_Biosyn_C1 superfamily	NA
Sobic.009G009000.1	88	Y	-	Terpene_cyclase_plant_C1,Isoprenoid_Biosyn_C1 superfamily	NA
Sobic.009G009000.1	89	S	-	Terpene_cyclase_plant_C1,Isoprenoid_Biosyn_C1 superfamily	NA
Sobic.009G009000.1	90	N	-	Terpene_cyclase_plant_C1,Isoprenoid_Biosyn_C1 superfamily	NA
Sobic.009G009000.1	91	P	-	Terpene_cyclase_plant_C1,Isoprenoid_Biosyn_C1 superfamily	NA
Sobic.009G009000.1	92	A	-	Terpene_cyclase_plant_C1,Isoprenoid_Biosyn_C1 superfamily	NA
Sobic.009G009000.1	93	T	-	Terpene_cyclase_plant_C1,Isoprenoid_Biosyn_C1 superfamily	NA
Sobic.009G009000.1	94	A	-	Terpene_cyclase_plant_C1,Isoprenoid_Biosyn_C1 superfamily	NA
Sobic.009G009000.1	95	N	-	Terpene_cyclase_plant_C1,Isoprenoid_Biosyn_C1 superfamily	NA
Sobic.009G009000.1	96	S	-	Terpene_cyclase_plant_C1,Isoprenoid_Biosyn_C1 superfamily	NA
Sobic.009G009000.1	97	S	-	Terpene_cyclase_plant_C1,Isoprenoid_Biosyn_C1 superfamily	NA
Sobic.009G009000.1	98	Q	-	Terpene_cyclase_plant_C1,Isoprenoid_Biosyn_C1 superfamily	NA
Sobic.009G009000.1	99	E	-	Terpene_cyclase_plant_C1,Isoprenoid_Biosyn_C1 superfamily	NA
Sobic.009G009000.1	100	Q	-	Terpene_cyclase_plant_C1,Isoprenoid_Biosyn_C1 superfamily	NA
Sobic.009G009000.1	101	I	-	Terpene_cyclase_plant_C1,Isoprenoid_Biosyn_C1 superfamily	NA
Sobic.009G009000.1	102	Q	-	Terpene_cyclase_plant_C1,Isoprenoid_Biosyn_C1 superfamily	NA
Sobic.009G009000.1	103	M	-	Terpene_cyclase_plant_C1,Isoprenoid_Biosyn_C1 superfamily	NA
Sobic.009G009000.1	104	E	-	Terpene_cyclase_plant_C1,Isoprenoid_Biosyn_C1 superfamily	NA
Sobic.009G009000.1	105	E	-	Terpene_cyclase_plant_C1,Isoprenoid_Biosyn_C1 superfamily	NA
Sobic.009G009000.1	106	R	-	Terpene_cyclase_plant_C1,Isoprenoid_Biosyn_C1 superfamily	NA
Sobic.009G009000.1	107	A	-	Terpene_cyclase_plant_C1,Isoprenoid_Biosyn_C1 superfamily	NA
Sobic.009G009000.1	108	E	-	Terpene_cyclase_plant_C1,Isoprenoid_Biosyn_C1 superfamily	NA
Sobic.009G009000.1	109	K	-	Terpene_cyclase_plant_C1,Isoprenoid_Biosyn_C1 superfamily	NA
Sobic.009G009000.1	110	L	-	Terpene_cyclase_plant_C1,Isoprenoid_Biosyn_C1 superfamily	NA
Sobic.009G009000.1	111	R	-	Terpene_cyclase_plant_C1,Isoprenoid_Biosyn_C1 superfamily	NA
Sobic.009G009000.1	112	E	-	Terpene_cyclase_plant_C1,Isoprenoid_Biosyn_C1 superfamily	NA
Sobic.009G009000.1	113	E	-	Terpene_cyclase_plant_C1,Isoprenoid_Biosyn_C1 superfamily	NA
Sobic.009G009000.1	114	V	-	Terpene_cyclase_plant_C1,Isoprenoid_Biosyn_C1 superfamily	NA
Sobic.009G009000.1	115	A	-	Terpene_cyclase_plant_C1,Isoprenoid_Biosyn_C1 superfamily	NA
Sobic.009G009000.1	116	E	-	Terpene_cyclase_plant_C1,Isoprenoid_Biosyn_C1 superfamily	NA
Sobic.009G009000.1	117	M	-	Terpene_cyclase_plant_C1,Isoprenoid_Biosyn_C1 superfamily	NA
Sobic.009G009000.1	118	I	-	Terpene_cyclase_plant_C1,Isoprenoid_Biosyn_C1 superfamily	NA
Sobic.009G009000.1	119	A	-	Terpene_cyclase_plant_C1,Isoprenoid_Biosyn_C1 superfamily	NA
Sobic.009G009000.1	120	S	-	Terpene_cyclase_plant_C1,Isoprenoid_Biosyn_C1 superfamily	NA
Sobic.009G009000.1	121	S	-	Terpene_cyclase_plant_C1,Isoprenoid_Biosyn_C1 superfamily	NA
Sobic.009G009000.1	122	S	-	Terpene_cyclase_plant_C1,Isoprenoid_Biosyn_C1 superfamily	NA
Sobic.009G009000.1	123	T	-	Terpene_cyclase_plant_C1,Isoprenoid_Biosyn_C1 superfamily	NA
Sobic.009G009000.1	124	T	-	Terpene_cyclase_plant_C1,Isoprenoid_Biosyn_C1 superfamily	NA
Sobic.009G009000.1	125	A	-	Terpene_cyclase_plant_C1,Isoprenoid_Biosyn_C1 superfamily	NA
Sobic.009G009000.1	126	S	-	Terpene_cyclase_plant_C1,Isoprenoid_Biosyn_C1 superfamily,PLN02279,Terpene_synth superfamily	NA
Sobic.009G009000.1	127	M	-	Terpene_cyclase_plant_C1,Isoprenoid_Biosyn_C1 superfamily,PLN02279,Terpene_synth superfamily	NA
Sobic.009G009000.1	128	L	-	Terpene_cyclase_plant_C1,Isoprenoid_Biosyn_C1 superfamily,PLN02279,Terpene_synth superfamily	NA
Sobic.009G009000.1	129	R	-	Terpene_cyclase_plant_C1,Isoprenoid_Biosyn_C1 superfamily,PLN02279,Terpene_synth superfamily	NA
Sobic.009G009000.1	130	L	-	Terpene_cyclase_plant_C1,Isoprenoid_Biosyn_C1 superfamily,PLN02279,Terpene_synth superfamily	NA
Sobic.009G009000.1	131	I	-	Terpene_cyclase_plant_C1,Isoprenoid_Biosyn_C1 superfamily,PLN02279,Terpene_synth superfamily	NA
Sobic.009G009000.1	132	D	-	Terpene_cyclase_plant_C1,Isoprenoid_Biosyn_C1 superfamily,PLN02279,Terpene_synth superfamily	NA
Sobic.009G009000.1	133	A	-	Terpene_cyclase_plant_C1,Isoprenoid_Biosyn_C1 superfamily,PLN02279,Terpene_synth superfamily	NA
Sobic.009G009000.1	134	L	-	Terpene_cyclase_plant_C1,Isoprenoid_Biosyn_C1 superfamily,PLN02279,Terpene_synth superfamily	NA
Sobic.009G009000.1	135	E	-	Terpene_cyclase_plant_C1,Isoprenoid_Biosyn_C1 superfamily,PLN02279,Terpene_synth superfamily	NA
Sobic.009G009000.1	136	R	-	Terpene_cyclase_plant_C1,Isoprenoid_Biosyn_C1 superfamily,PLN02279,Terpene_synth superfamily	NA
Sobic.009G009000.1	137	L	-	Terpene_cyclase_plant_C1,Isoprenoid_Biosyn_C1 superfamily,PLN02279,Terpene_synth superfamily	NA
Sobic.009G009000.1	138	C	-	Terpene_cyclase_plant_C1,Isoprenoid_Biosyn_C1 superfamily,PLN02279,Terpene_synth superfamily	NA
Sobic.009G009000.1	139	L	-	Terpene_cyclase_plant_C1,Isoprenoid_Biosyn_C1 superfamily,PLN02279,Terpene_synth superfamily	NA
Sobic.009G009000.1	140	D	-	Terpene_cyclase_plant_C1,Isoprenoid_Biosyn_C1 superfamily,PLN02279,Terpene_synth superfamily	NA
Sobic.009G009000.1	141	H	-	Terpene_cyclase_plant_C1,Isoprenoid_Biosyn_C1 superfamily,PLN02279,Terpene_synth superfamily	NA
Sobic.009G009000.1	142	L	-	Terpene_cyclase_plant_C1,Isoprenoid_Biosyn_C1 superfamily,PLN02279,Terpene_synth superfamily	NA
Sobic.009G009000.1	143	F	-	Terpene_cyclase_plant_C1,Isoprenoid_Biosyn_C1 superfamily,PLN02279,Terpene_synth superfamily	NA
Sobic.009G009000.1	144	E	-	Terpene_cyclase_plant_C1,Isoprenoid_Biosyn_C1 superfamily,PLN02279,Terpene_synth superfamily	NA
Sobic.009G009000.1	145	E	-	Terpene_cyclase_plant_C1,Isoprenoid_Biosyn_C1 superfamily,PLN02279,Terpene_synth superfamily	NA
Sobic.009G009000.1	146	E	-	Terpene_cyclase_plant_C1,Isoprenoid_Biosyn_C1 superfamily,PLN02279,Terpene_synth superfamily	NA
Sobic.009G009000.1	147	I	-	Terpene_cyclase_plant_C1,Isoprenoid_Biosyn_C1 superfamily,PLN02279,Terpene_synth superfamily	NA
Sobic.009G009000.1	148	S	-	Terpene_cyclase_plant_C1,Isoprenoid_Biosyn_C1 superfamily,PLN02279,Terpene_synth superfamily	NA
Sobic.009G009000.1	149	A	-	Terpene_cyclase_plant_C1,Isoprenoid_Biosyn_C1 superfamily,PLN02279,Terpene_synth superfamily	NA
Sobic.009G009000.1	150	A	-	Terpene_cyclase_plant_C1,Isoprenoid_Biosyn_C1 superfamily,PLN02279,Terpene_synth superfamily	NA
Sobic.009G009000.1	151	L	-	Terpene_cyclase_plant_C1,Isoprenoid_Biosyn_C1 superfamily,PLN02279,Terpene_synth superfamily	NA
Sobic.009G009000.1	152	A	-	Terpene_cyclase_plant_C1,Isoprenoid_Biosyn_C1 superfamily,PLN02279,Terpene_synth superfamily	NA
Sobic.009G009000.1	153	E	-	Terpene_cyclase_plant_C1,Isoprenoid_Biosyn_C1 superfamily,PLN02279,Terpene_synth superfamily	NA
Sobic.009G009000.1	154	I	-	Terpene_cyclase_plant_C1,Isoprenoid_Biosyn_C1 superfamily,PLN02279,Terpene_synth superfamily	NA
Sobic.009G009000.1	155	E	-	Terpene_cyclase_plant_C1,Isoprenoid_Biosyn_C1 superfamily,PLN02279,Terpene_synth superfamily	NA
Sobic.009G009000.1	156	T	-	Terpene_cyclase_plant_C1,Isoprenoid_Biosyn_C1 superfamily,PLN02279,Terpene_synth superfamily	NA
Sobic.009G009000.1	157	A	-	Terpene_cyclase_plant_C1,Isoprenoid_Biosyn_C1 superfamily,PLN02279,Terpene_synth superfamily	NA
Sobic.009G009000.1	158	D	-	Terpene_cyclase_plant_C1,Isoprenoid_Biosyn_C1 superfamily,PLN02279,Terpene_synth superfamily	NA
Sobic.009G009000.1	159	V	-	Terpene_cyclase_plant_C1,Isoprenoid_Biosyn_C1 superfamily,PLN02279,Terpene_synth superfamily	NA
Sobic.009G009000.1	160	S	-	Terpene_cyclase_plant_C1,Isoprenoid_Biosyn_C1 superfamily,PLN02279,Terpene_synth superfamily	NA
Sobic.009G009000.1	161	D	-	Terpene_cyclase_plant_C1,Isoprenoid_Biosyn_C1 superfamily,PLN02279,Terpene_synth superfamily	NA
Sobic.009G009000.1	162	W	-	Terpene_cyclase_plant_C1,Isoprenoid_Biosyn_C1 superfamily,PLN02279,Terpene_synth superfamily	NA
Sobic.009G009000.1	163	D	-	Terpene_cyclase_plant_C1,Isoprenoid_Biosyn_C1 superfamily,PLN02279,Terpene_synth superfamily	NA
Sobic.009G009000.1	164	L	-	Terpene_cyclase_plant_C1,Isoprenoid_Biosyn_C1 superfamily,PLN02279,Terpene_synth superfamily	NA
Sobic.009G009000.1	165	G	-	Terpene_cyclase_plant_C1,Isoprenoid_Biosyn_C1 superfamily,PLN02279,Terpene_synth superfamily	NA
Sobic.009G009000.1	166	T	-	Terpene_cyclase_plant_C1,Isoprenoid_Biosyn_C1 superfamily,PLN02279,Terpene_synth superfamily	NA
Sobic.009G009000.1	167	V	-	Terpene_cyclase_plant_C1,Isoprenoid_Biosyn_C1 superfamily,PLN02279,Terpene_synth superfamily	NA
Sobic.009G009000.1	168	A	-	Terpene_cyclase_plant_C1,Isoprenoid_Biosyn_C1 superfamily,PLN02279,Terpene_synth superfamily	NA
Sobic.009G009000.1	169	L	-	Terpene_cyclase_plant_C1,Isoprenoid_Biosyn_C1 superfamily,PLN02279,Terpene_synth superfamily	NA
Sobic.009G009000.1	170	W	-	Terpene_cyclase_plant_C1,Isoprenoid_Biosyn_C1 superfamily,PLN02279,Terpene_synth superfamily	NA
Sobic.009G009000.1	171	F	-	Terpene_cyclase_plant_C1,Isoprenoid_Biosyn_C1 superfamily,PLN02279,Terpene_synth superfamily	NA
Sobic.009G009000.1	172	C	-	Terpene_cyclase_plant_C1,Isoprenoid_Biosyn_C1 superfamily,PLN02279,Terpene_synth superfamily	NA
Sobic.009G009000.1	173	L	-	Terpene_cyclase_plant_C1,Isoprenoid_Biosyn_C1 superfamily,PLN02279,Terpene_synth superfamily	NA
Sobic.009G009000.1	174	L	-	Terpene_cyclase_plant_C1,Isoprenoid_Biosyn_C1 superfamily,PLN02279,Terpene_synth superfamily	NA
Sobic.009G009000.1	175	R	-	Terpene_cyclase_plant_C1,Isoprenoid_Biosyn_C1 superfamily,PLN02279,Terpene_synth superfamily	NA
Sobic.009G009000.1	176	K	-	Terpene_cyclase_plant_C1,Isoprenoid_Biosyn_C1 superfamily,PLN02279,Terpene_synth superfamily	NA
Sobic.009G009000.1	177	H	-	Terpene_cyclase_plant_C1,Isoprenoid_Biosyn_C1 superfamily,PLN02279,Terpene_synth superfamily	NA
Sobic.009G009000.1	178	R	-	Terpene_cyclase_plant_C1,Isoprenoid_Biosyn_C1 superfamily,PLN02279,Terpene_synth superfamily	NA
Sobic.009G009000.1	179	Y	-	Terpene_cyclase_plant_C1,Isoprenoid_Biosyn_C1 superfamily,PLN02279,Terpene_synth superfamily	NA
Sobic.009G009000.1	180	R	-	Terpene_cyclase_plant_C1,Isoprenoid_Biosyn_C1 superfamily,PLN02279,Terpene_synth superfamily	NA
Sobic.009G009000.1	181	V	-	Terpene_cyclase_plant_C1,Isoprenoid_Biosyn_C1 superfamily,PLN02279,Terpene_synth superfamily	NA
Sobic.009G009000.1	182	S	-	Terpene_cyclase_plant_C1,Isoprenoid_Biosyn_C1 superfamily,PLN02279,Terpene_synth superfamily	NA
Sobic.009G009000.1	183	P	-	Terpene_cyclase_plant_C1,Isoprenoid_Biosyn_C1 superfamily,PLN02279,Terpene_synth superfamily	NA
Sobic.009G009000.1	184	G	-	Terpene_cyclase_plant_C1,Isoprenoid_Biosyn_C1 superfamily,PLN02279,Terpene_synth superfamily	NA
Sobic.009G009000.1	185	V	-	Terpene_cyclase_plant_C1,Isoprenoid_Biosyn_C1 superfamily,PLN02279,Terpene_synth superfamily	NA
Sobic.009G009000.1	186	F	-	Terpene_cyclase_plant_C1,Isoprenoid_Biosyn_C1 superfamily,PLN02279,Terpene_synth superfamily	NA
Sobic.009G009000.1	187	V	-	Terpene_cyclase_plant_C1,Isoprenoid_Biosyn_C1 superfamily,PLN02279,Terpene_synth superfamily	NA
Sobic.009G009000.1	188	R	-	Terpene_cyclase_plant_C1,Isoprenoid_Biosyn_C1 superfamily,PLN02279,Terpene_synth superfamily	NA
Sobic.009G009000.1	189	F	-	Terpene_cyclase_plant_C1,Isoprenoid_Biosyn_C1 superfamily,PLN02279,Terpene_synth superfamily	NA
Sobic.009G009000.1	190	K	-	Terpene_cyclase_plant_C1,Isoprenoid_Biosyn_C1 superfamily,PLN02279,Terpene_synth superfamily	NA
Sobic.009G009000.1	191	D	-	Terpene_cyclase_plant_C1,Isoprenoid_Biosyn_C1 superfamily,PLN02279,Terpene_synth superfamily	NA
Sobic.009G009000.1	192	E	-	Terpene_cyclase_plant_C1,Isoprenoid_Biosyn_C1 superfamily,PLN02279,Terpene_synth superfamily	NA
Sobic.009G009000.1	193	G	-	Terpene_cyclase_plant_C1,Isoprenoid_Biosyn_C1 superfamily,PLN02279,Terpene_synth superfamily	NA
Sobic.009G009000.1	194	D	-	Terpene_cyclase_plant_C1,Isoprenoid_Biosyn_C1 superfamily,PLN02279,Terpene_synth superfamily	NA
Sobic.009G009000.1	195	F	-	Terpene_cyclase_plant_C1,Isoprenoid_Biosyn_C1 superfamily,PLN02279,Terpene_synth superfamily	NA
Sobic.009G009000.1	196	L	-	Terpene_cyclase_plant_C1,Isoprenoid_Biosyn_C1 superfamily,PLN02279,Terpene_synth superfamily	NA
Sobic.009G009000.1	197	A	-	Terpene_cyclase_plant_C1,Isoprenoid_Biosyn_C1 superfamily,PLN02279,Terpene_synth superfamily	NA
Sobic.009G009000.1	198	D	-	Terpene_cyclase_plant_C1,Isoprenoid_Biosyn_C1 superfamily,PLN02279,Terpene_synth superfamily	NA
Sobic.009G009000.1	199	N	-	Terpene_cyclase_plant_C1,Isoprenoid_Biosyn_C1 superfamily,PLN02279,Terpene_synth superfamily	NA
Sobic.009G009000.1	200	P	-	Terpene_cyclase_plant_C1,Isoprenoid_Biosyn_C1 superfamily,PLN02279,Terpene_synth superfamily	NA
Sobic.009G009000.1	201	R	-	Terpene_cyclase_plant_C1,Isoprenoid_Biosyn_C1 superfamily,PLN02279,Terpene_synth superfamily	NA
Sobic.009G009000.1	202	D	-	Terpene_cyclase_plant_C1,Isoprenoid_Biosyn_C1 superfamily,PLN02279,Terpene_synth superfamily	NA
Sobic.009G009000.1	203	L	-	Terpene_cyclase_plant_C1,Isoprenoid_Biosyn_C1 superfamily,PLN02279,Terpene_synth superfamily	NA
Sobic.009G009000.1	204	L	-	Terpene_cyclase_plant_C1,Isoprenoid_Biosyn_C1 superfamily,PLN02279,Terpene_synth superfamily	NA
Sobic.009G009000.1	205	N	-	Terpene_cyclase_plant_C1,Isoprenoid_Biosyn_C1 superfamily,PLN02279,Terpene_synth superfamily	NA
Sobic.009G009000.1	206	L	-	Terpene_cyclase_plant_C1,Isoprenoid_Biosyn_C1 superfamily,PLN02279,Terpene_synth superfamily	NA
Sobic.009G009000.1	207	Y	-	Terpene_cyclase_plant_C1,Isoprenoid_Biosyn_C1 superfamily,PLN02279,Terpene_synth superfamily	NA
Sobic.009G009000.1	208	N	-	Terpene_cyclase_plant_C1,Isoprenoid_Biosyn_C1 superfamily,PLN02279,Terpene_synth superfamily	NA
Sobic.009G009000.1	209	A	-	Terpene_cyclase_plant_C1,Isoprenoid_Biosyn_C1 superfamily,PLN02279,Terpene_synth superfamily	NA
Sobic.009G009000.1	210	A	-	Terpene_cyclase_plant_C1,Isoprenoid_Biosyn_C1 superfamily,PLN02279,Terpene_synth superfamily	NA
Sobic.009G009000.1	211	H	-	Terpene_cyclase_plant_C1,Isoprenoid_Biosyn_C1 superfamily,PLN02279,Terpene_synth superfamily	NA
Sobic.009G009000.1	212	M	-	Terpene_cyclase_plant_C1,Isoprenoid_Biosyn_C1 superfamily,PLN02279,Terpene_synth superfamily	NA
Sobic.009G009000.1	213	R	-	Terpene_cyclase_plant_C1,Isoprenoid_Biosyn_C1 superfamily,PLN02279,Terpene_synth superfamily	NA
Sobic.009G009000.1	214	T	-	Terpene_cyclase_plant_C1,Isoprenoid_Biosyn_C1 superfamily,PLN02279,Terpene_synth superfamily	NA
Sobic.009G009000.1	215	H	-	Terpene_cyclase_plant_C1,Isoprenoid_Biosyn_C1 superfamily,PLN02279,Terpene_synth superfamily	NA
Sobic.009G009000.1	216	G	-	Terpene_cyclase_plant_C1,Isoprenoid_Biosyn_C1 superfamily,PLN02279,Terpene_synth superfamily	NA
Sobic.009G009000.1	217	E	-	Terpene_cyclase_plant_C1,Isoprenoid_Biosyn_C1 superfamily,PLN02279,Terpene_synth superfamily	NA
Sobic.009G009000.1	218	I	-	Terpene_cyclase_plant_C1,Isoprenoid_Biosyn_C1 superfamily,PLN02279,Terpene_synth superfamily	NA
Sobic.009G009000.1	219	I	-	Terpene_cyclase_plant_C1,Isoprenoid_Biosyn_C1 superfamily,PLN02279,Terpene_synth superfamily	NA
Sobic.009G009000.1	220	L	-	Terpene_cyclase_plant_C1,Isoprenoid_Biosyn_C1 superfamily,PLN02279,Terpene_synth superfamily	NA
Sobic.009G009000.1	221	E	-	Terpene_cyclase_plant_C1,Isoprenoid_Biosyn_C1 superfamily,PLN02279,Terpene_synth superfamily	NA
Sobic.009G009000.1	222	E	-	Terpene_cyclase_plant_C1,Isoprenoid_Biosyn_C1 superfamily,PLN02279,Terpene_synth superfamily	NA
Sobic.009G009000.1	223	A	-	Terpene_cyclase_plant_C1,Isoprenoid_Biosyn_C1 superfamily,PLN02279,Terpene_synth superfamily	NA
Sobic.009G009000.1	224	M	-	Terpene_cyclase_plant_C1,Isoprenoid_Biosyn_C1 superfamily,PLN02279,Terpene_synth superfamily	NA
Sobic.009G009000.1	225	L	-	Terpene_cyclase_plant_C1,Isoprenoid_Biosyn_C1 superfamily,PLN02279,Terpene_synth superfamily	NA
Sobic.009G009000.1	226	F	-	Terpene_cyclase_plant_C1,Isoprenoid_Biosyn_C1 superfamily,PLN02279,Terpene_synth superfamily	NA
Sobic.009G009000.1	227	S	-	Terpene_cyclase_plant_C1,Isoprenoid_Biosyn_C1 superfamily,PLN02279,Terpene_synth superfamily	NA
Sobic.009G009000.1	228	Q	-	Terpene_cyclase_plant_C1,Isoprenoid_Biosyn_C1 superfamily,PLN02279,Terpene_synth superfamily	NA
Sobic.009G009000.1	229	R	-	Terpene_cyclase_plant_C1,Isoprenoid_Biosyn_C1 superfamily,PLN02279,Terpene_synth superfamily	NA
Sobic.009G009000.1	230	R	-	Terpene_cyclase_plant_C1,Isoprenoid_Biosyn_C1 superfamily,PLN02279,Terpene_synth superfamily	NA
Sobic.009G009000.1	231	L	-	Terpene_cyclase_plant_C1,Isoprenoid_Biosyn_C1 superfamily,PLN02279,Terpene_synth superfamily	NA
Sobic.009G009000.1	232	E	-	Terpene_cyclase_plant_C1,Isoprenoid_Biosyn_C1 superfamily,PLN02279,Terpene_synth superfamily	NA
Sobic.009G009000.1	233	T	-	Terpene_cyclase_plant_C1,Isoprenoid_Biosyn_C1 superfamily,PLN02279,Terpene_synth superfamily	NA
Sobic.009G009000.1	234	I	-	Terpene_cyclase_plant_C1,Isoprenoid_Biosyn_C1 superfamily,PLN02279,Terpene_synth superfamily	NA
Sobic.009G009000.1	235	L	-	Terpene_cyclase_plant_C1,Isoprenoid_Biosyn_C1 superfamily,PLN02279,Terpene_synth superfamily	NA
Sobic.009G009000.1	236	P	-	Terpene_cyclase_plant_C1,Isoprenoid_Biosyn_C1 superfamily,PLN02279,Terpene_synth superfamily	NA
Sobic.009G009000.1	237	Y	-	Terpene_cyclase_plant_C1,Isoprenoid_Biosyn_C1 superfamily,PLN02279,Terpene_synth superfamily	NA
Sobic.009G009000.1	238	M	-	Terpene_cyclase_plant_C1,Isoprenoid_Biosyn_C1 superfamily,PLN02279,Terpene_synth superfamily	NA
Sobic.009G009000.1	239	E	-	Terpene_cyclase_plant_C1,Isoprenoid_Biosyn_C1 superfamily,PLN02279,Terpene_synth superfamily	NA
Sobic.009G009000.1	240	G	-	Terpene_cyclase_plant_C1,Isoprenoid_Biosyn_C1 superfamily,PLN02279,Terpene_synth superfamily	NA
Sobic.009G009000.1	241	S	-	Terpene_cyclase_plant_C1,Isoprenoid_Biosyn_C1 superfamily,PLN02279,Terpene_synth superfamily	NA
Sobic.009G009000.1	242	L	-	Terpene_cyclase_plant_C1,Isoprenoid_Biosyn_C1 superfamily,PLN02279,Terpene_synth superfamily	NA
Sobic.009G009000.1	243	A	-	Terpene_cyclase_plant_C1,Isoprenoid_Biosyn_C1 superfamily,PLN02279,Terpene_synth superfamily	NA
Sobic.009G009000.1	244	R	-	Terpene_cyclase_plant_C1,Isoprenoid_Biosyn_C1 superfamily,PLN02279,Terpene_synth superfamily	NA
Sobic.009G009000.1	245	E	-	Terpene_cyclase_plant_C1,Isoprenoid_Biosyn_C1 superfamily,PLN02279,Terpene_synth superfamily	NA
Sobic.009G009000.1	246	I	-	Terpene_cyclase_plant_C1,Isoprenoid_Biosyn_C1 superfamily,PLN02279,Terpene_synth superfamily	NA
Sobic.009G009000.1	247	K	-	Terpene_cyclase_plant_C1,Isoprenoid_Biosyn_C1 superfamily,PLN02279,Terpene_synth superfamily	NA
Sobic.009G009000.1	248	S	-	Terpene_cyclase_plant_C1,Isoprenoid_Biosyn_C1 superfamily,PLN02279,Terpene_synth superfamily	NA
Sobic.009G009000.1	249	A	-	Terpene_cyclase_plant_C1,Isoprenoid_Biosyn_C1 superfamily,PLN02279,Terpene_synth superfamily	NA
Sobic.009G009000.1	250	L	-	Terpene_cyclase_plant_C1,Isoprenoid_Biosyn_C1 superfamily,PLN02279,Terpene_synth superfamily	NA
Sobic.009G009000.1	251	E	-	Terpene_cyclase_plant_C1,Isoprenoid_Biosyn_C1 superfamily,PLN02279,Terpene_synth superfamily	NA
Sobic.009G009000.1	252	I	-	Terpene_cyclase_plant_C1,Isoprenoid_Biosyn_C1 superfamily,PLN02279,Terpene_synth superfamily	NA
Sobic.009G009000.1	253	S	-	Terpene_cyclase_plant_C1,Isoprenoid_Biosyn_C1 superfamily,PLN02279,Terpene_synth superfamily	NA
Sobic.009G009000.1	254	L	-	Terpene_cyclase_plant_C1,Isoprenoid_Biosyn_C1 superfamily,PLN02279,Terpene_synth superfamily	NA
Sobic.009G009000.1	255	P	-	Terpene_cyclase_plant_C1,Isoprenoid_Biosyn_C1 superfamily,PLN02279,Terpene_synth superfamily	NA
Sobic.009G009000.1	256	R	-	Terpene_cyclase_plant_C1,Isoprenoid_Biosyn_C1 superfamily,PLN02279,Terpene_synth superfamily	NA
Sobic.009G009000.1	257	R	-	Terpene_cyclase_plant_C1,Isoprenoid_Biosyn_C1 superfamily,PLN02279,Terpene_synth superfamily	NA
Sobic.009G009000.1	258	V	-	Terpene_cyclase_plant_C1,Isoprenoid_Biosyn_C1 superfamily,PLN02279,Terpene_synth superfamily	NA
Sobic.009G009000.1	259	R	-	Terpene_cyclase_plant_C1,Isoprenoid_Biosyn_C1 superfamily,PLN02279,Terpene_synth superfamily	NA
Sobic.009G009000.1	260	I	-	Terpene_cyclase_plant_C1,Isoprenoid_Biosyn_C1 superfamily,PLN02279,Terpene_synth superfamily	NA
Sobic.009G009000.1	261	F	-	Terpene_cyclase_plant_C1,Isoprenoid_Biosyn_C1 superfamily,PLN02279,Terpene_synth superfamily	NA
Sobic.009G009000.1	262	E	-	Terpene_cyclase_plant_C1,Isoprenoid_Biosyn_C1 superfamily,PLN02279,Terpene_synth superfamily	NA
Sobic.009G009000.1	263	S	-	Terpene_cyclase_plant_C1,Isoprenoid_Biosyn_C1 superfamily,PLN02279,Terpene_synth superfamily	NA
Sobic.009G009000.1	264	K	-	Terpene_cyclase_plant_C1,Isoprenoid_Biosyn_C1 superfamily,PLN02279,Terpene_synth superfamily	NA
Sobic.009G009000.1	265	Y	-	Terpene_cyclase_plant_C1,Isoprenoid_Biosyn_C1 superfamily,PLN02279,Terpene_synth superfamily	NA
Sobic.009G009000.1	266	Y	-	Terpene_cyclase_plant_C1,Isoprenoid_Biosyn_C1 superfamily,PLN02279,Terpene_synth superfamily	NA
Sobic.009G009000.1	267	I	-	Terpene_cyclase_plant_C1,Isoprenoid_Biosyn_C1 superfamily,PLN02279,Terpene_synth superfamily	NA
Sobic.009G009000.1	268	S	-	Terpene_cyclase_plant_C1,Isoprenoid_Biosyn_C1 superfamily,PLN02279,Terpene_synth superfamily	NA
Sobic.009G009000.1	269	T	-	Terpene_cyclase_plant_C1,Isoprenoid_Biosyn_C1 superfamily,PLN02279,Terpene_synth superfamily	NA
Sobic.009G009000.1	270	Y	-	Terpene_cyclase_plant_C1,Isoprenoid_Biosyn_C1 superfamily,PLN02279,Terpene_synth superfamily	NA
Sobic.009G009000.1	271	E	-	Terpene_cyclase_plant_C1,Isoprenoid_Biosyn_C1 superfamily,PLN02279,Terpene_synth superfamily	NA
Sobic.009G009000.1	272	K	-	Terpene_cyclase_plant_C1,Isoprenoid_Biosyn_C1 superfamily,PLN02279,Terpene_synth superfamily	NA
Sobic.009G009000.1	273	D	-	Terpene_cyclase_plant_C1,Isoprenoid_Biosyn_C1 superfamily,PLN02279,Terpene_synth superfamily	NA
Sobic.009G009000.1	274	A	-	Terpene_cyclase_plant_C1,Isoprenoid_Biosyn_C1 superfamily,PLN02279,Terpene_synth superfamily	NA
